# Supplementary material for: Trends and Burden of Autism Spectrum Disorder in BRICS Countries: A Global Burden of Disease Analysis from 1990 to 2021
Source: Research Square preprint supplement (doi:10.21203/rs.3.rs-7626996/v1), 2025-10-09
Supplement: Supplementary file 1 [file c3223b577bc2baf431d30498.docx]

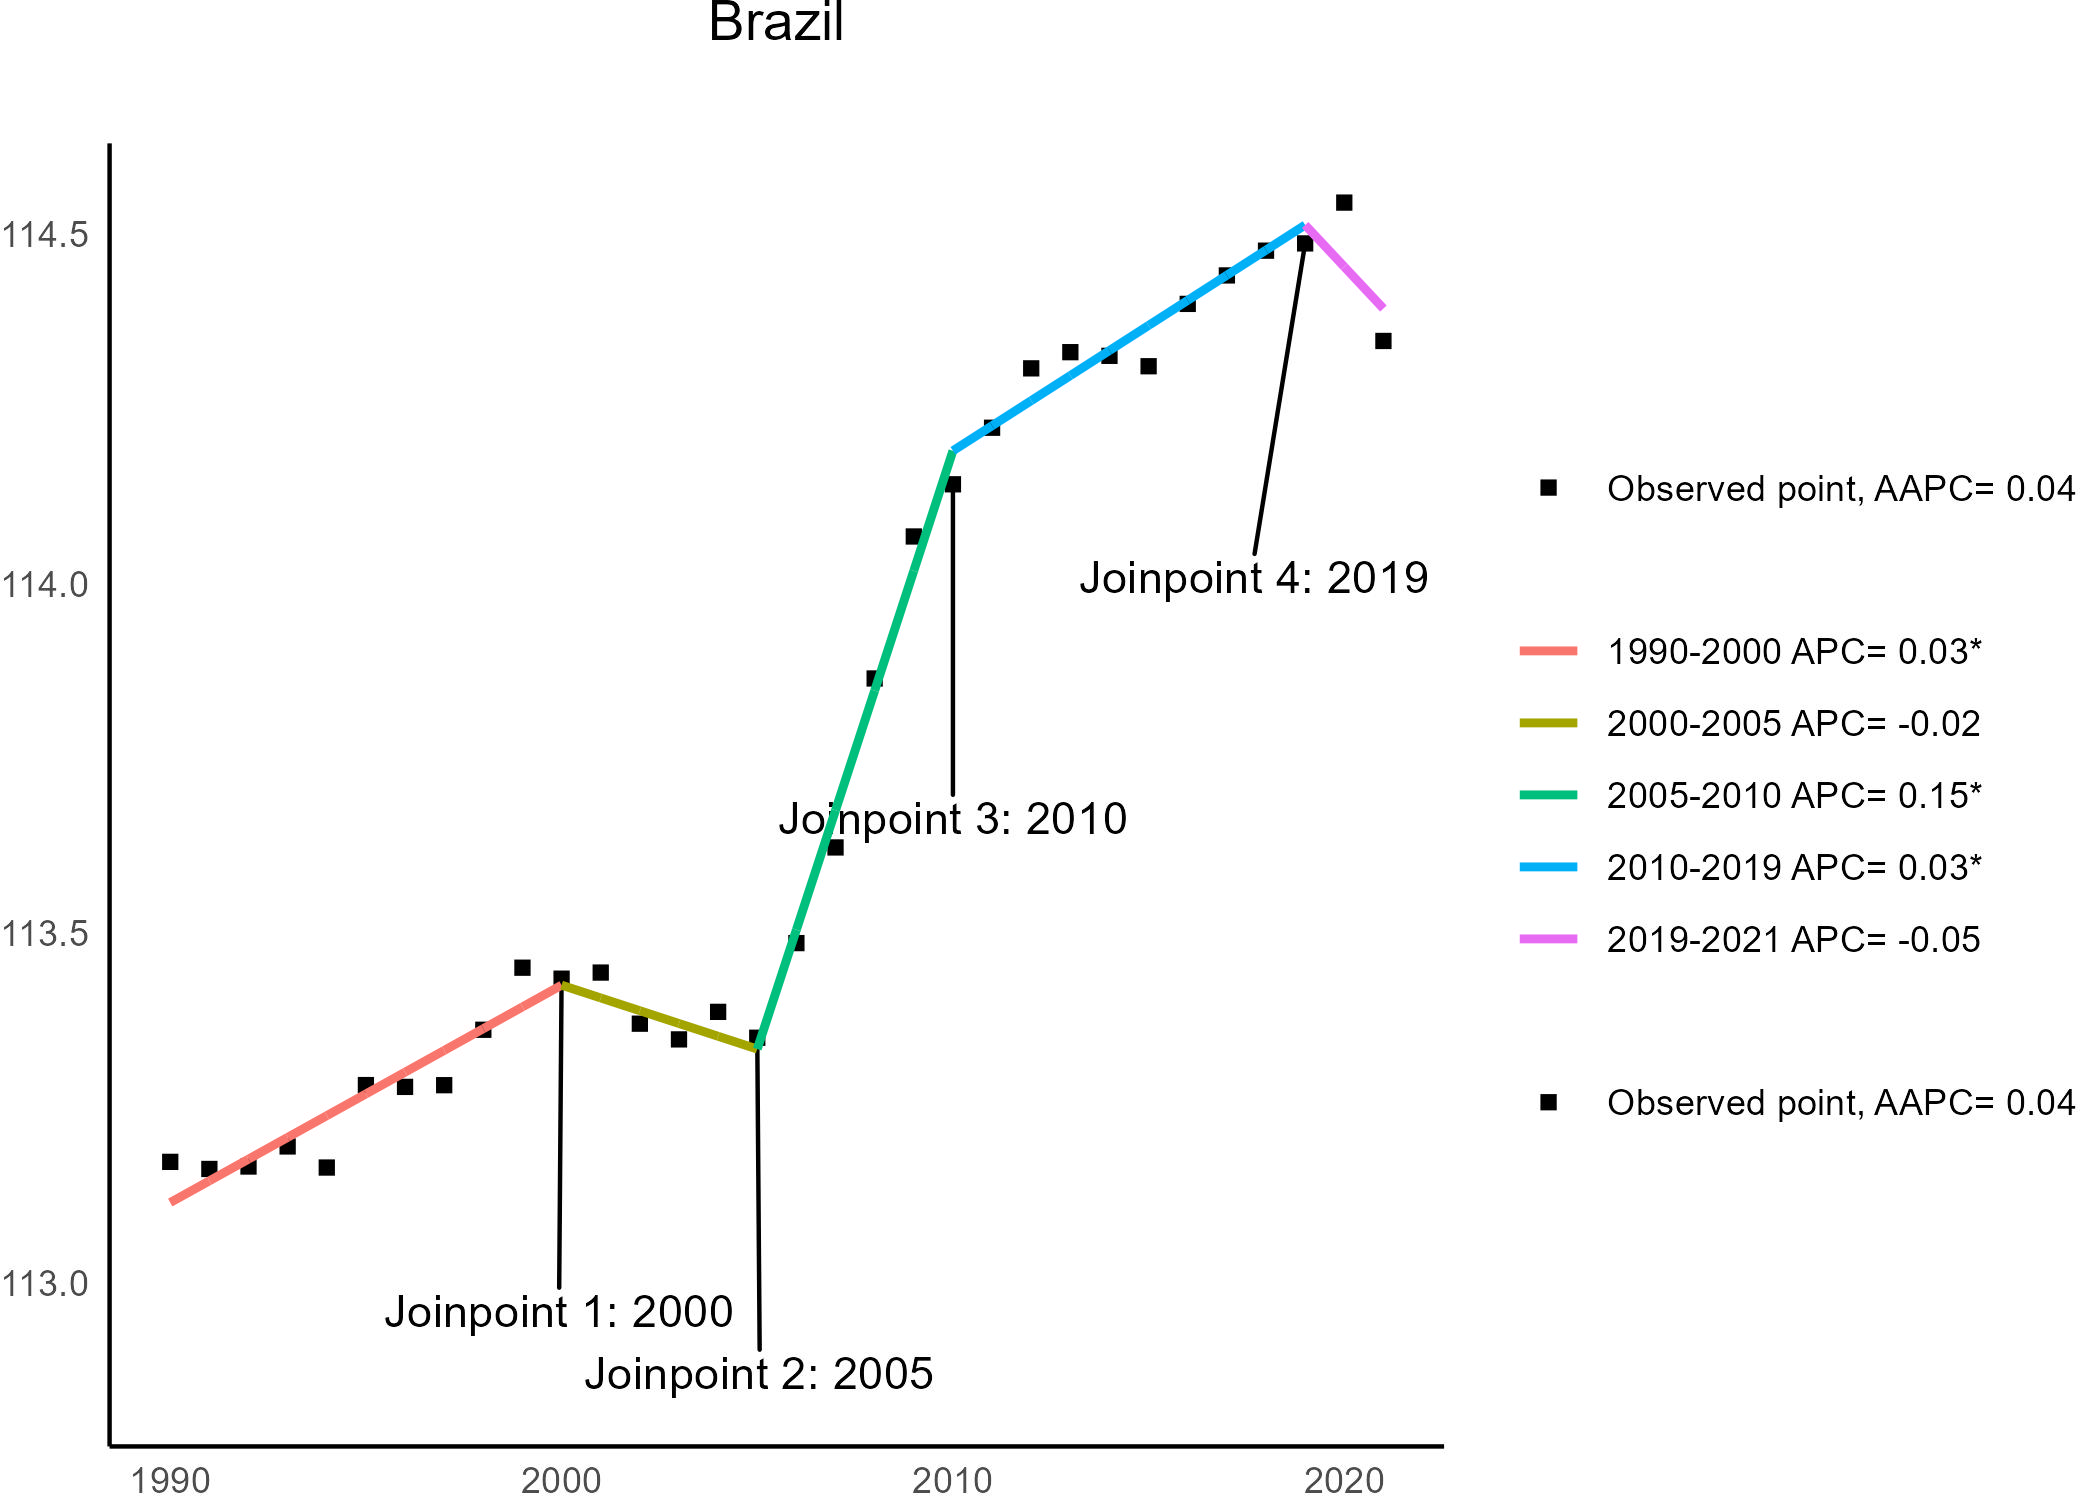

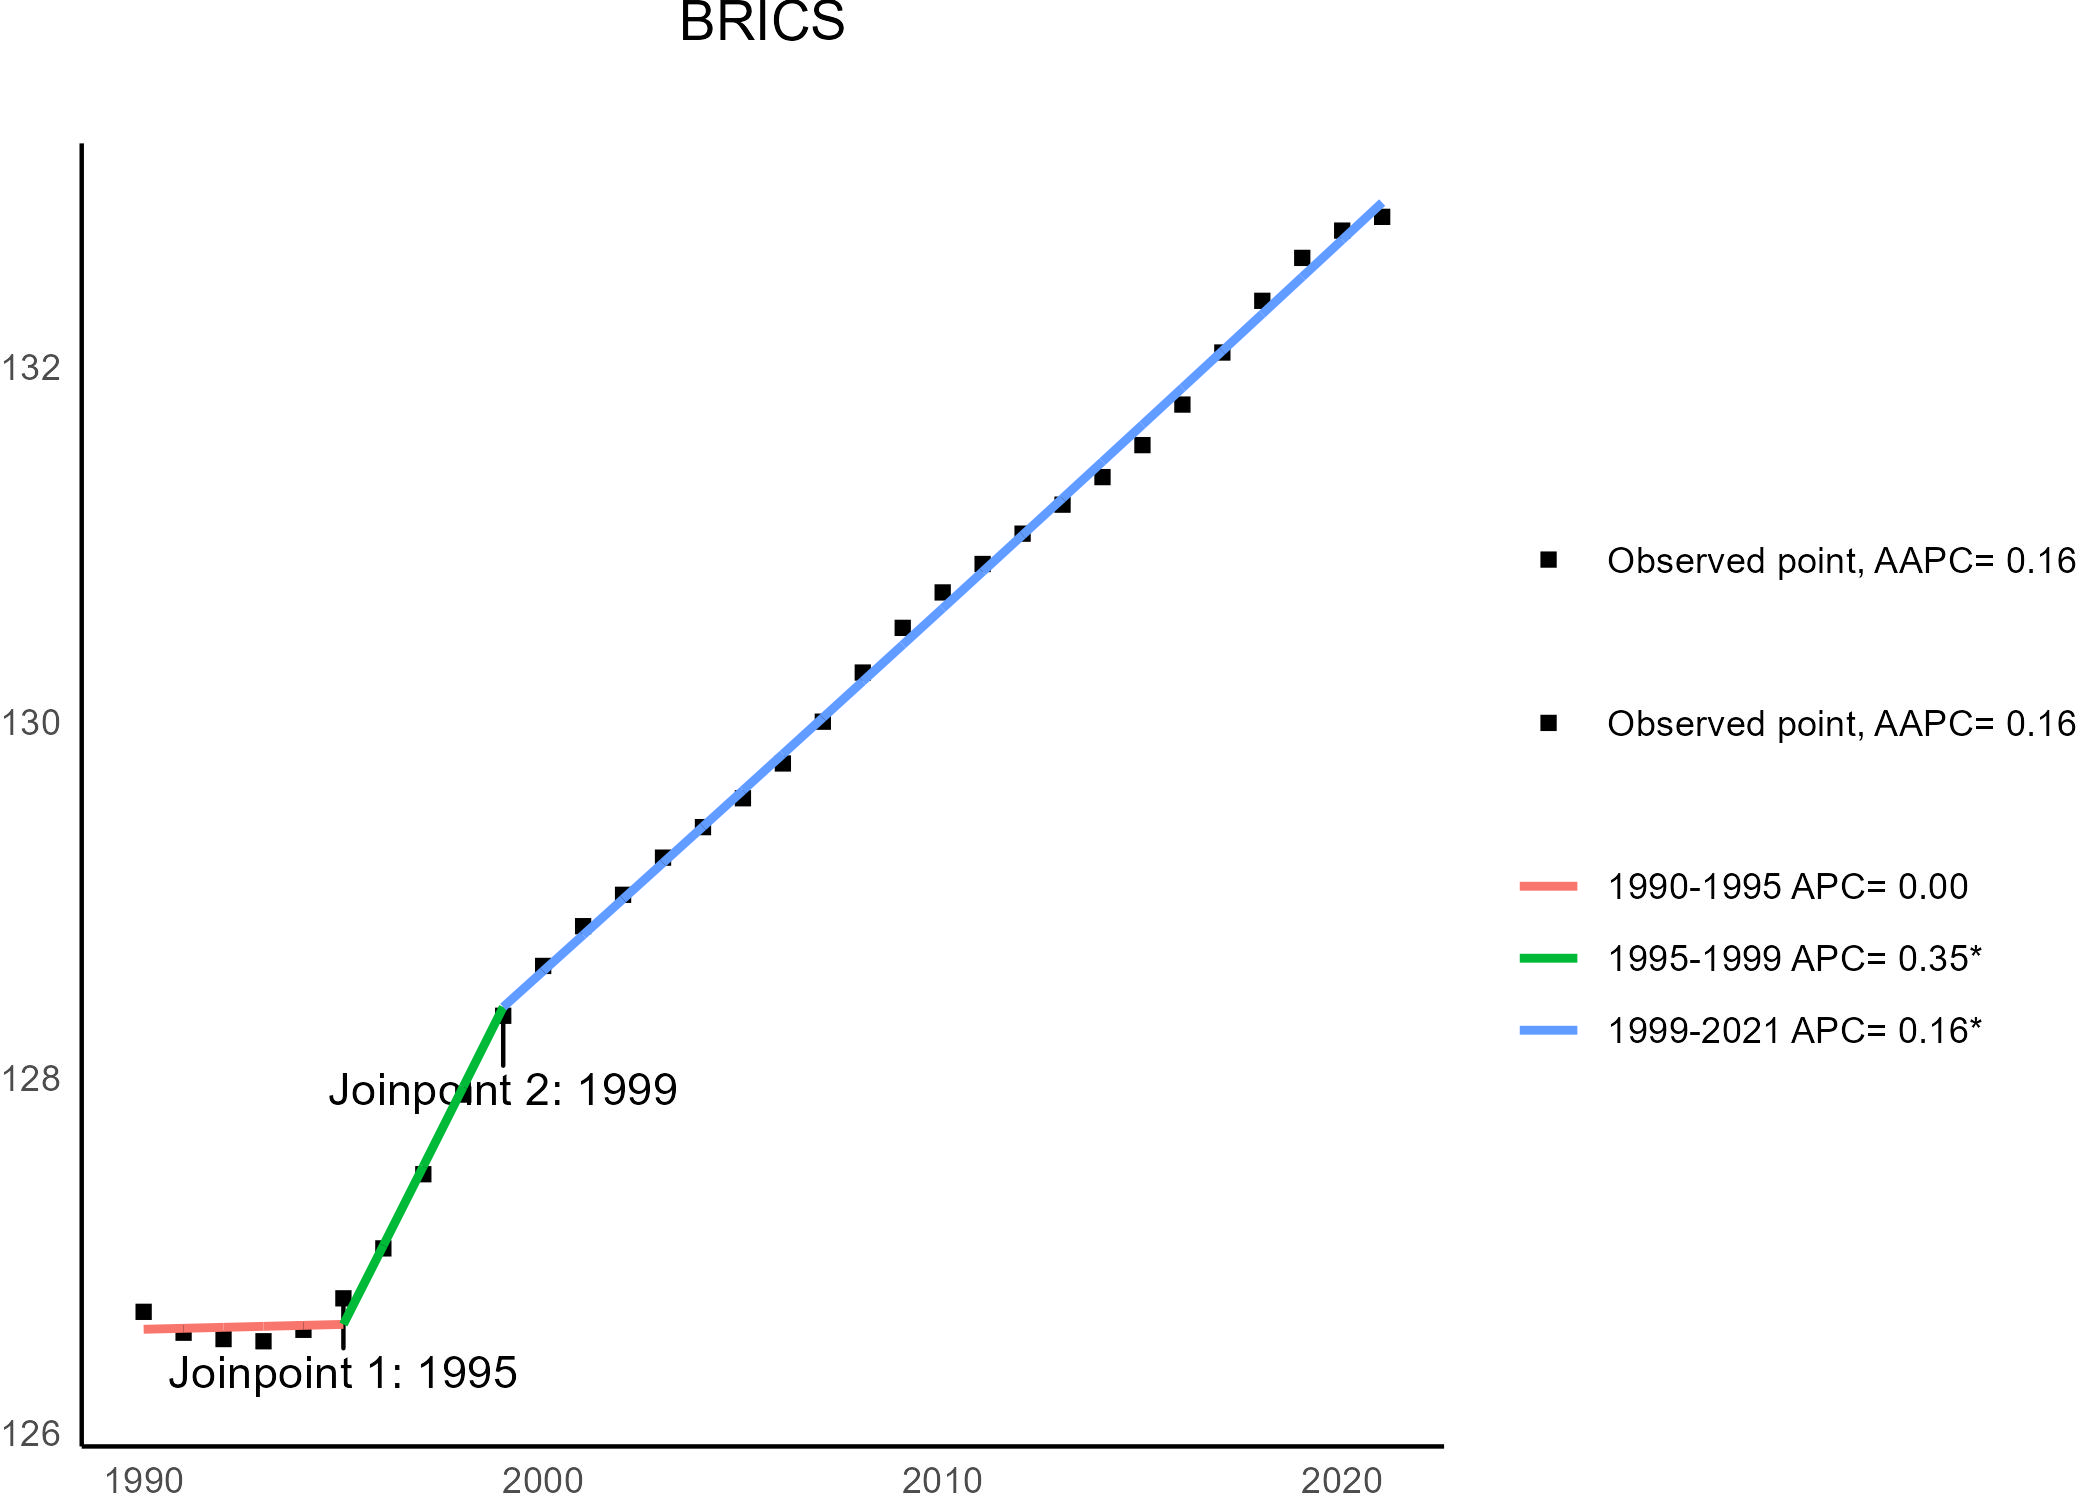

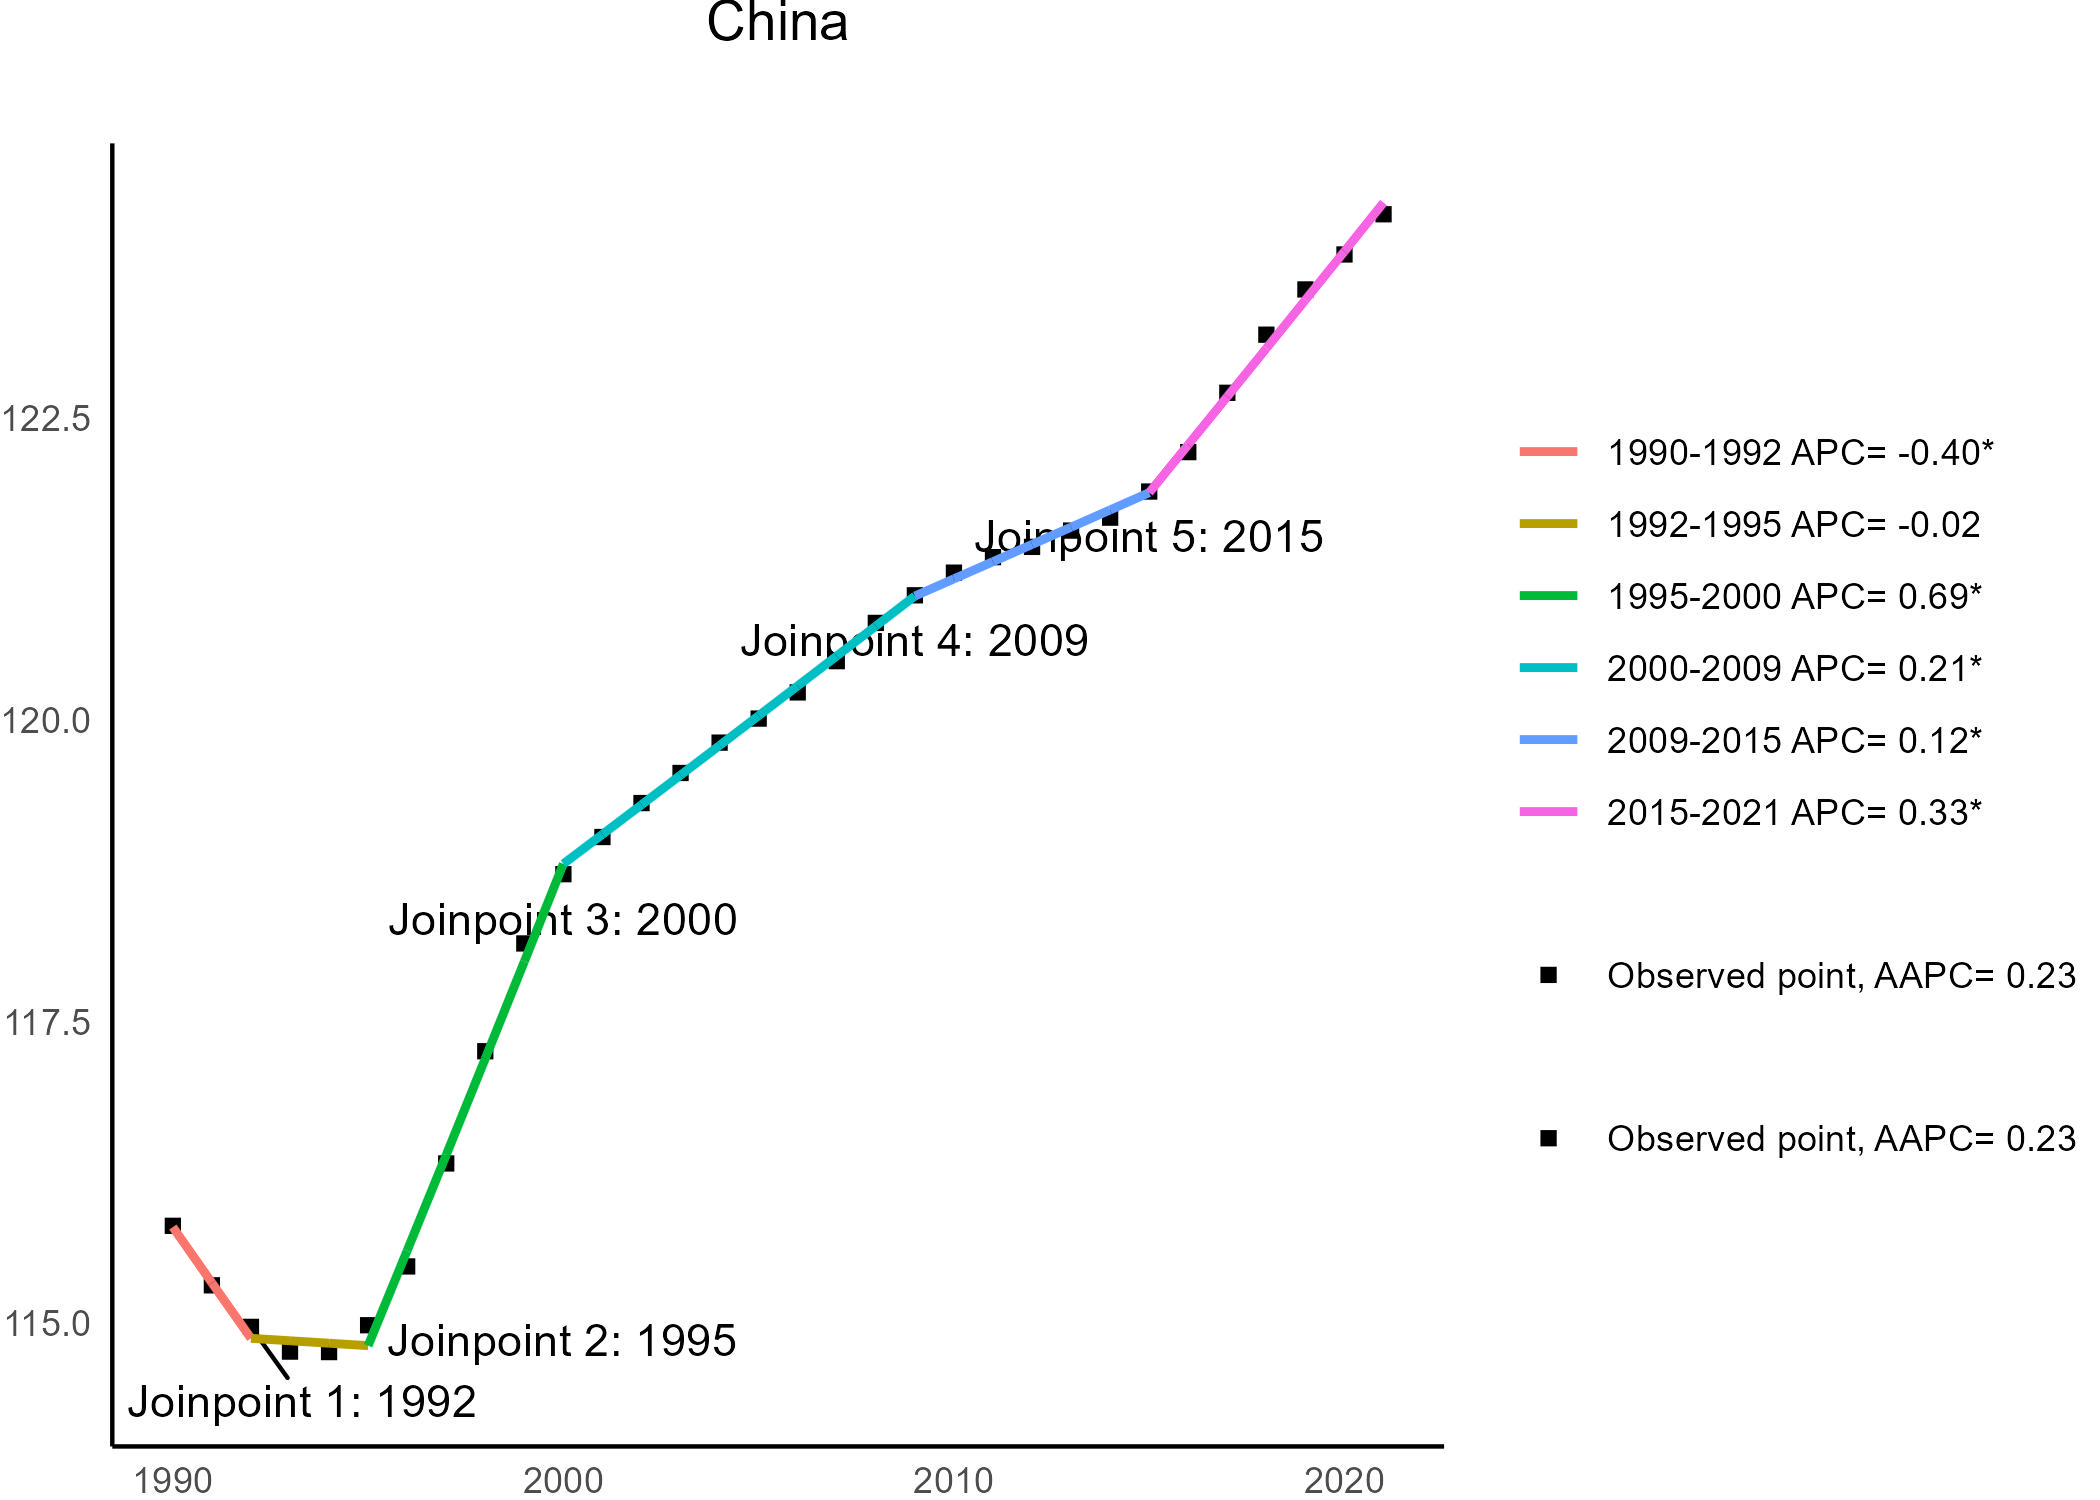

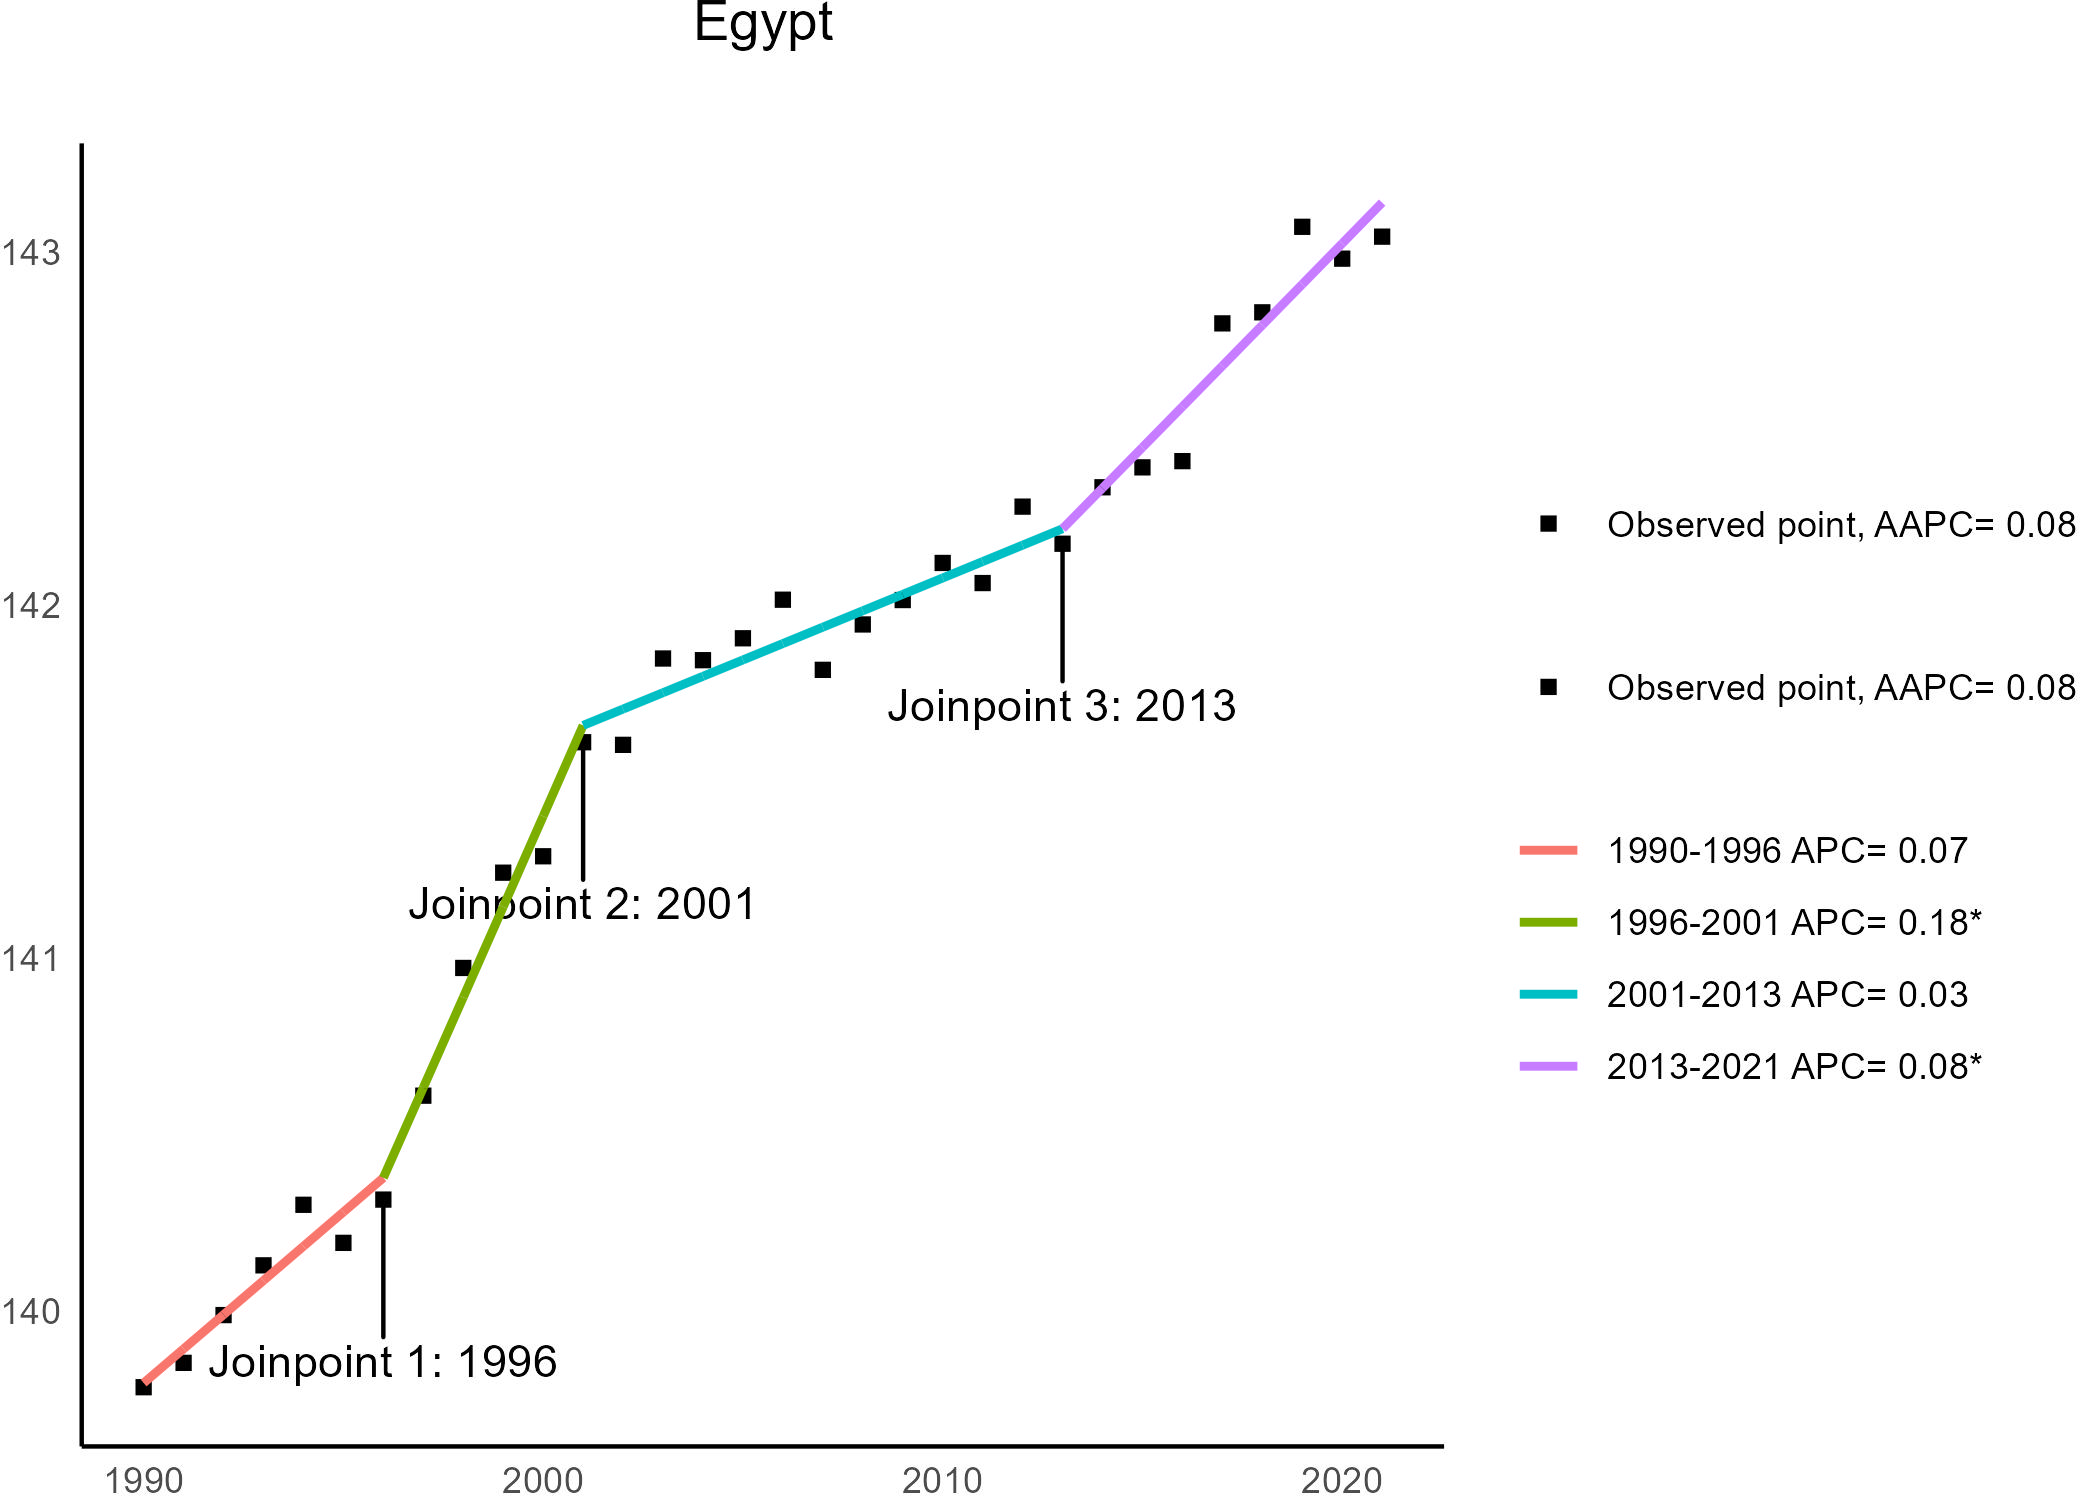

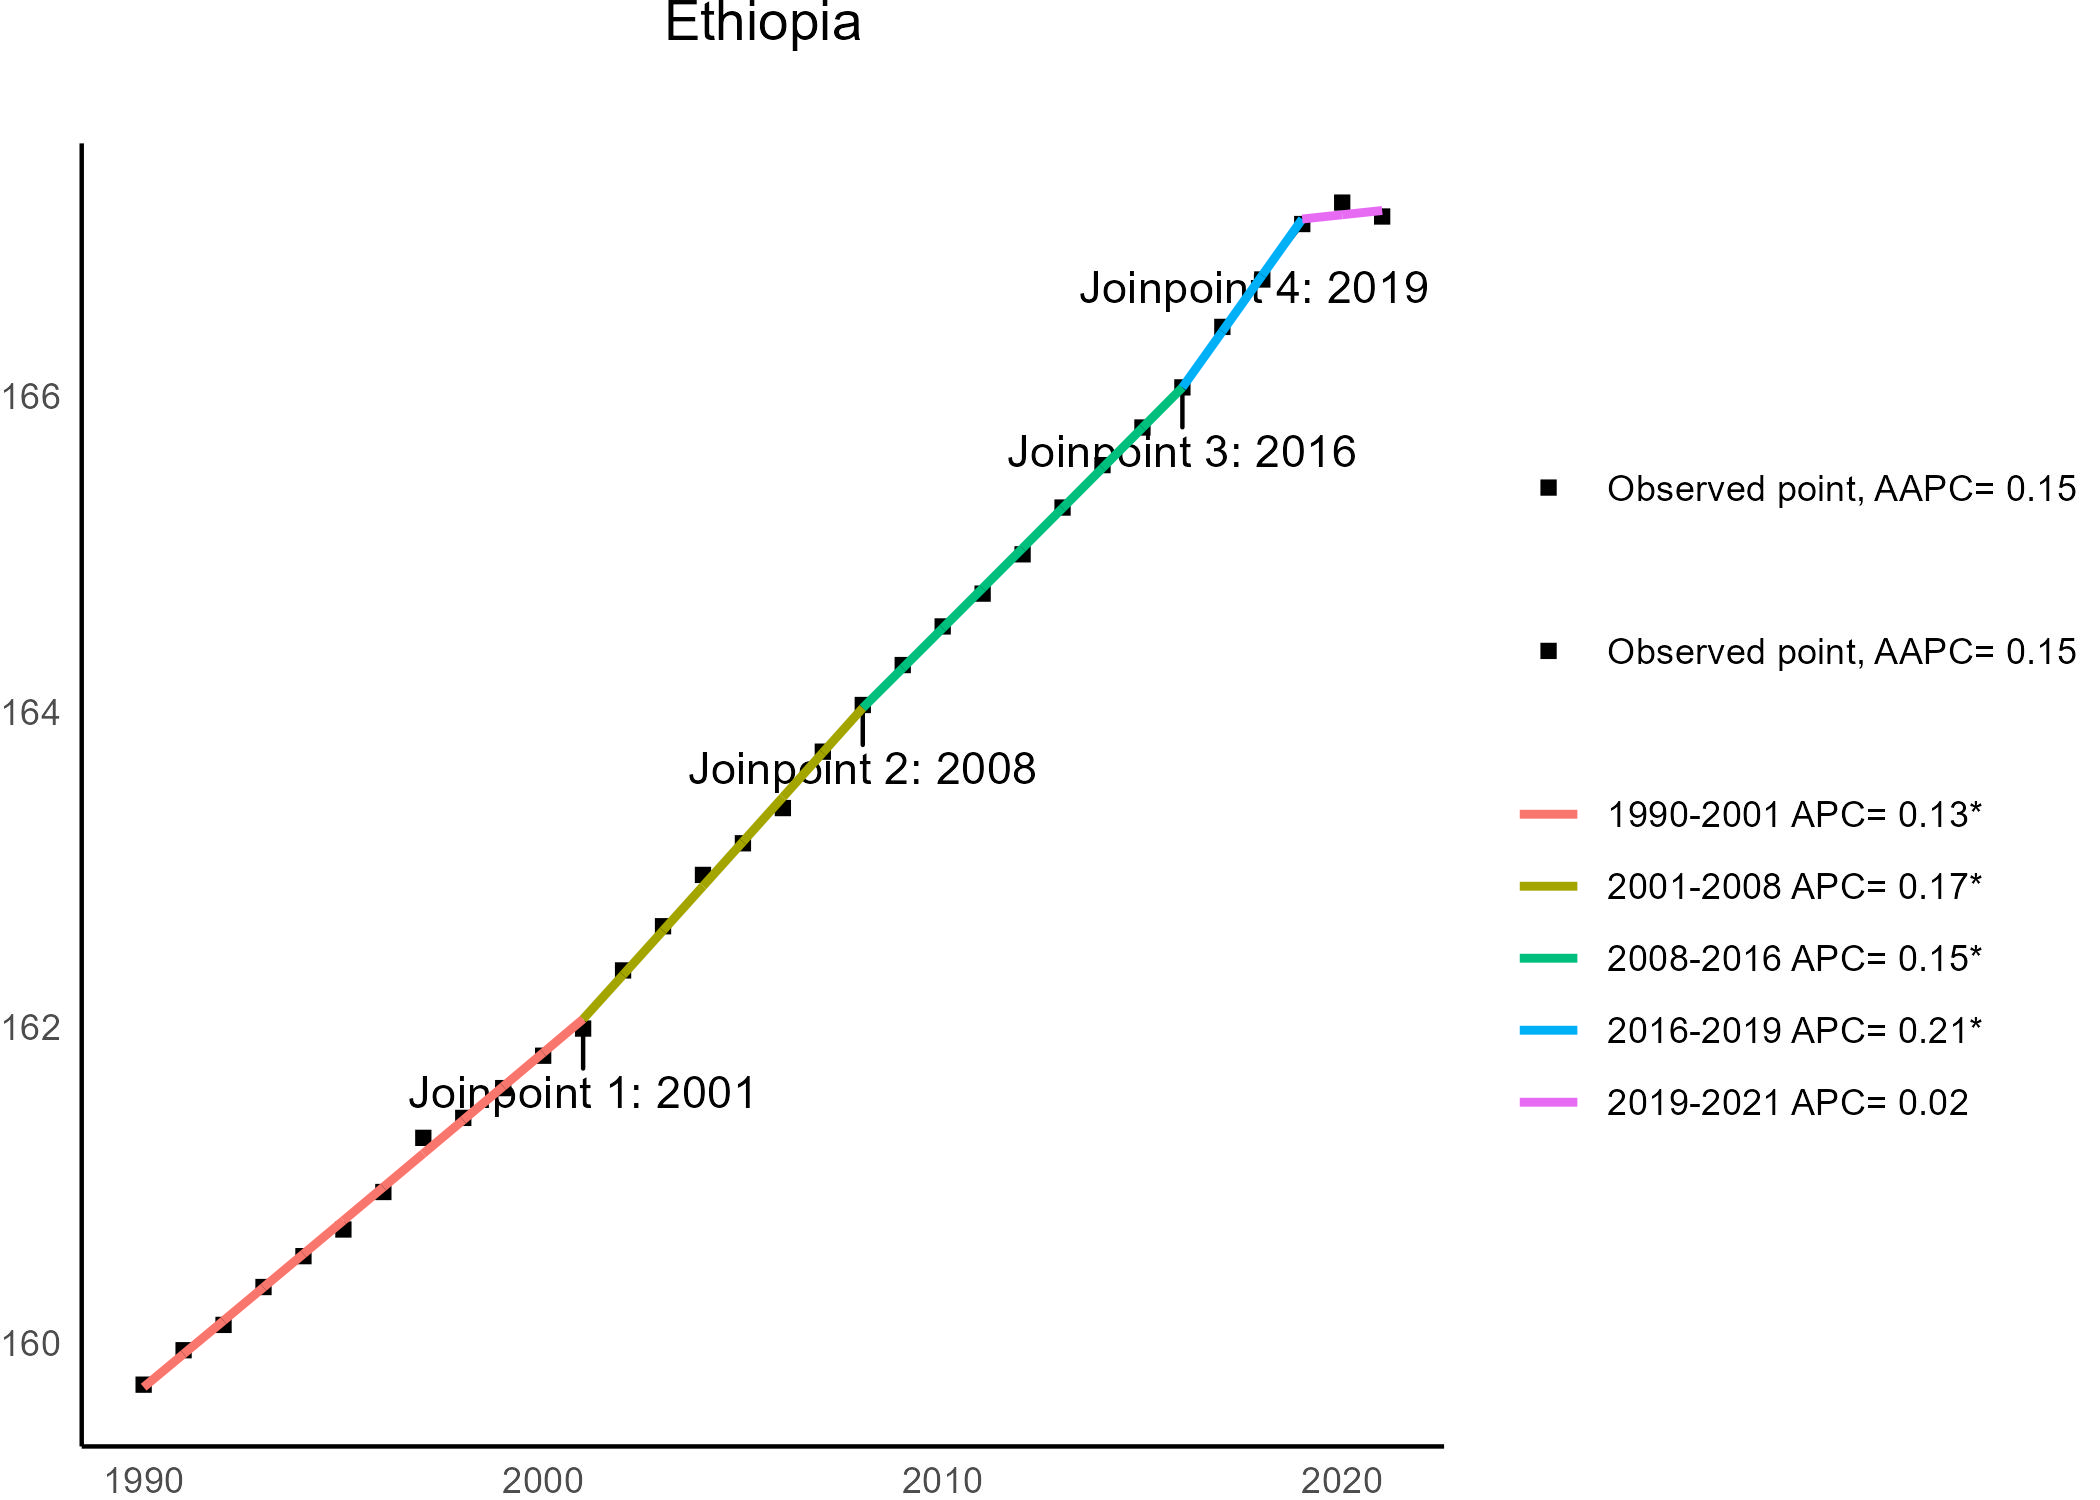

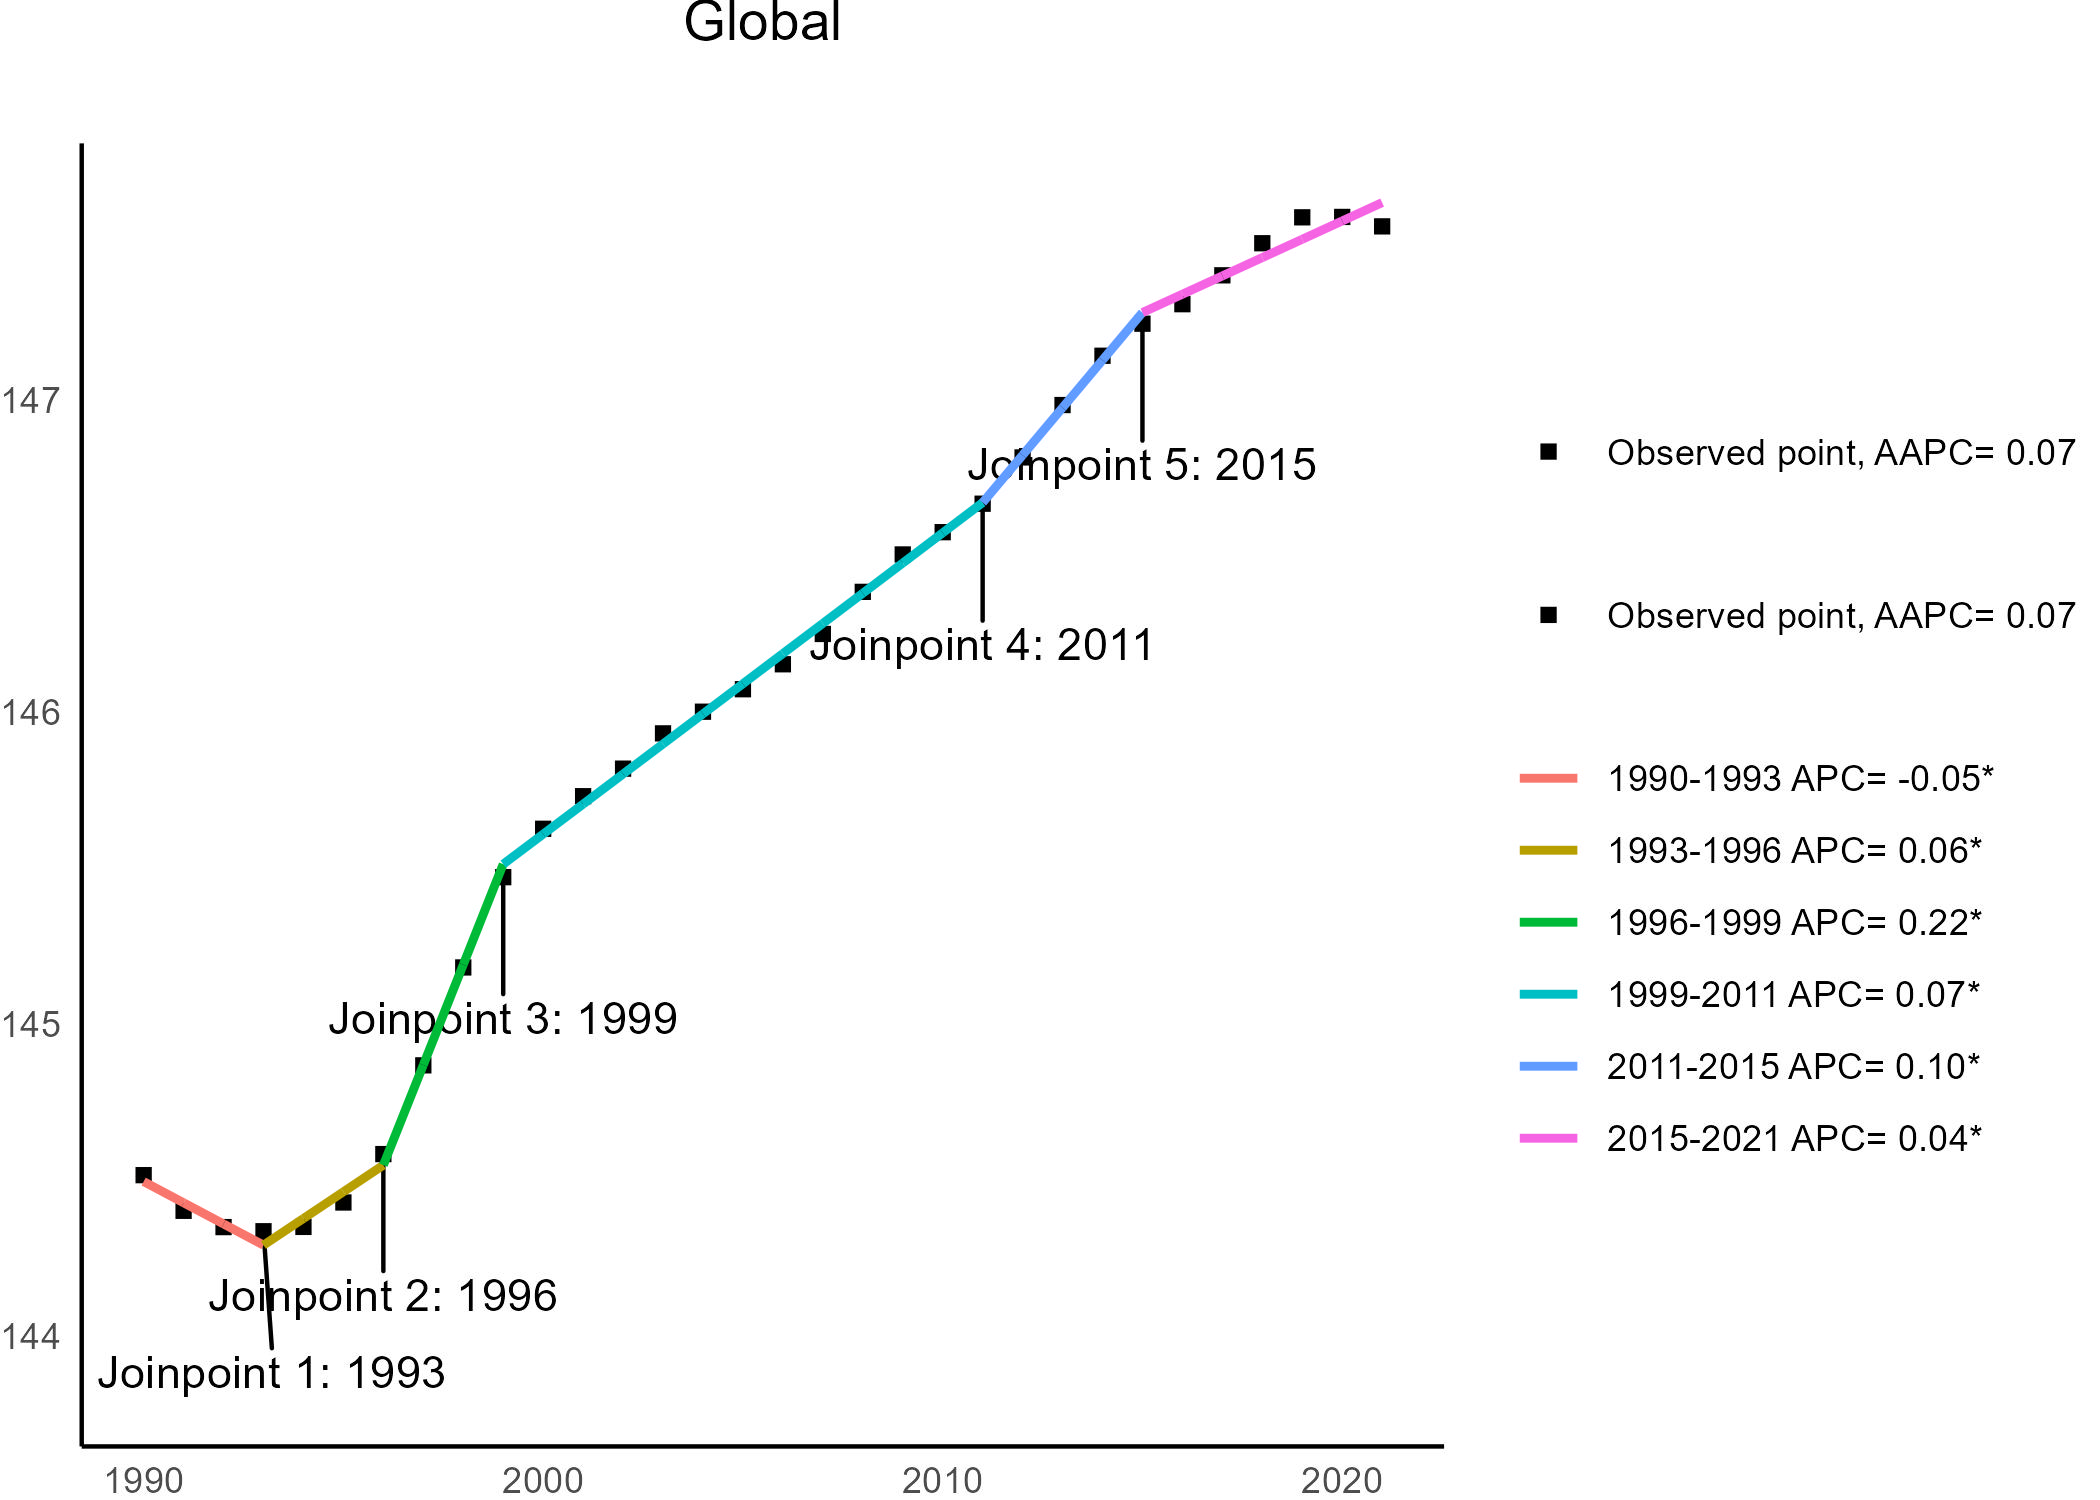

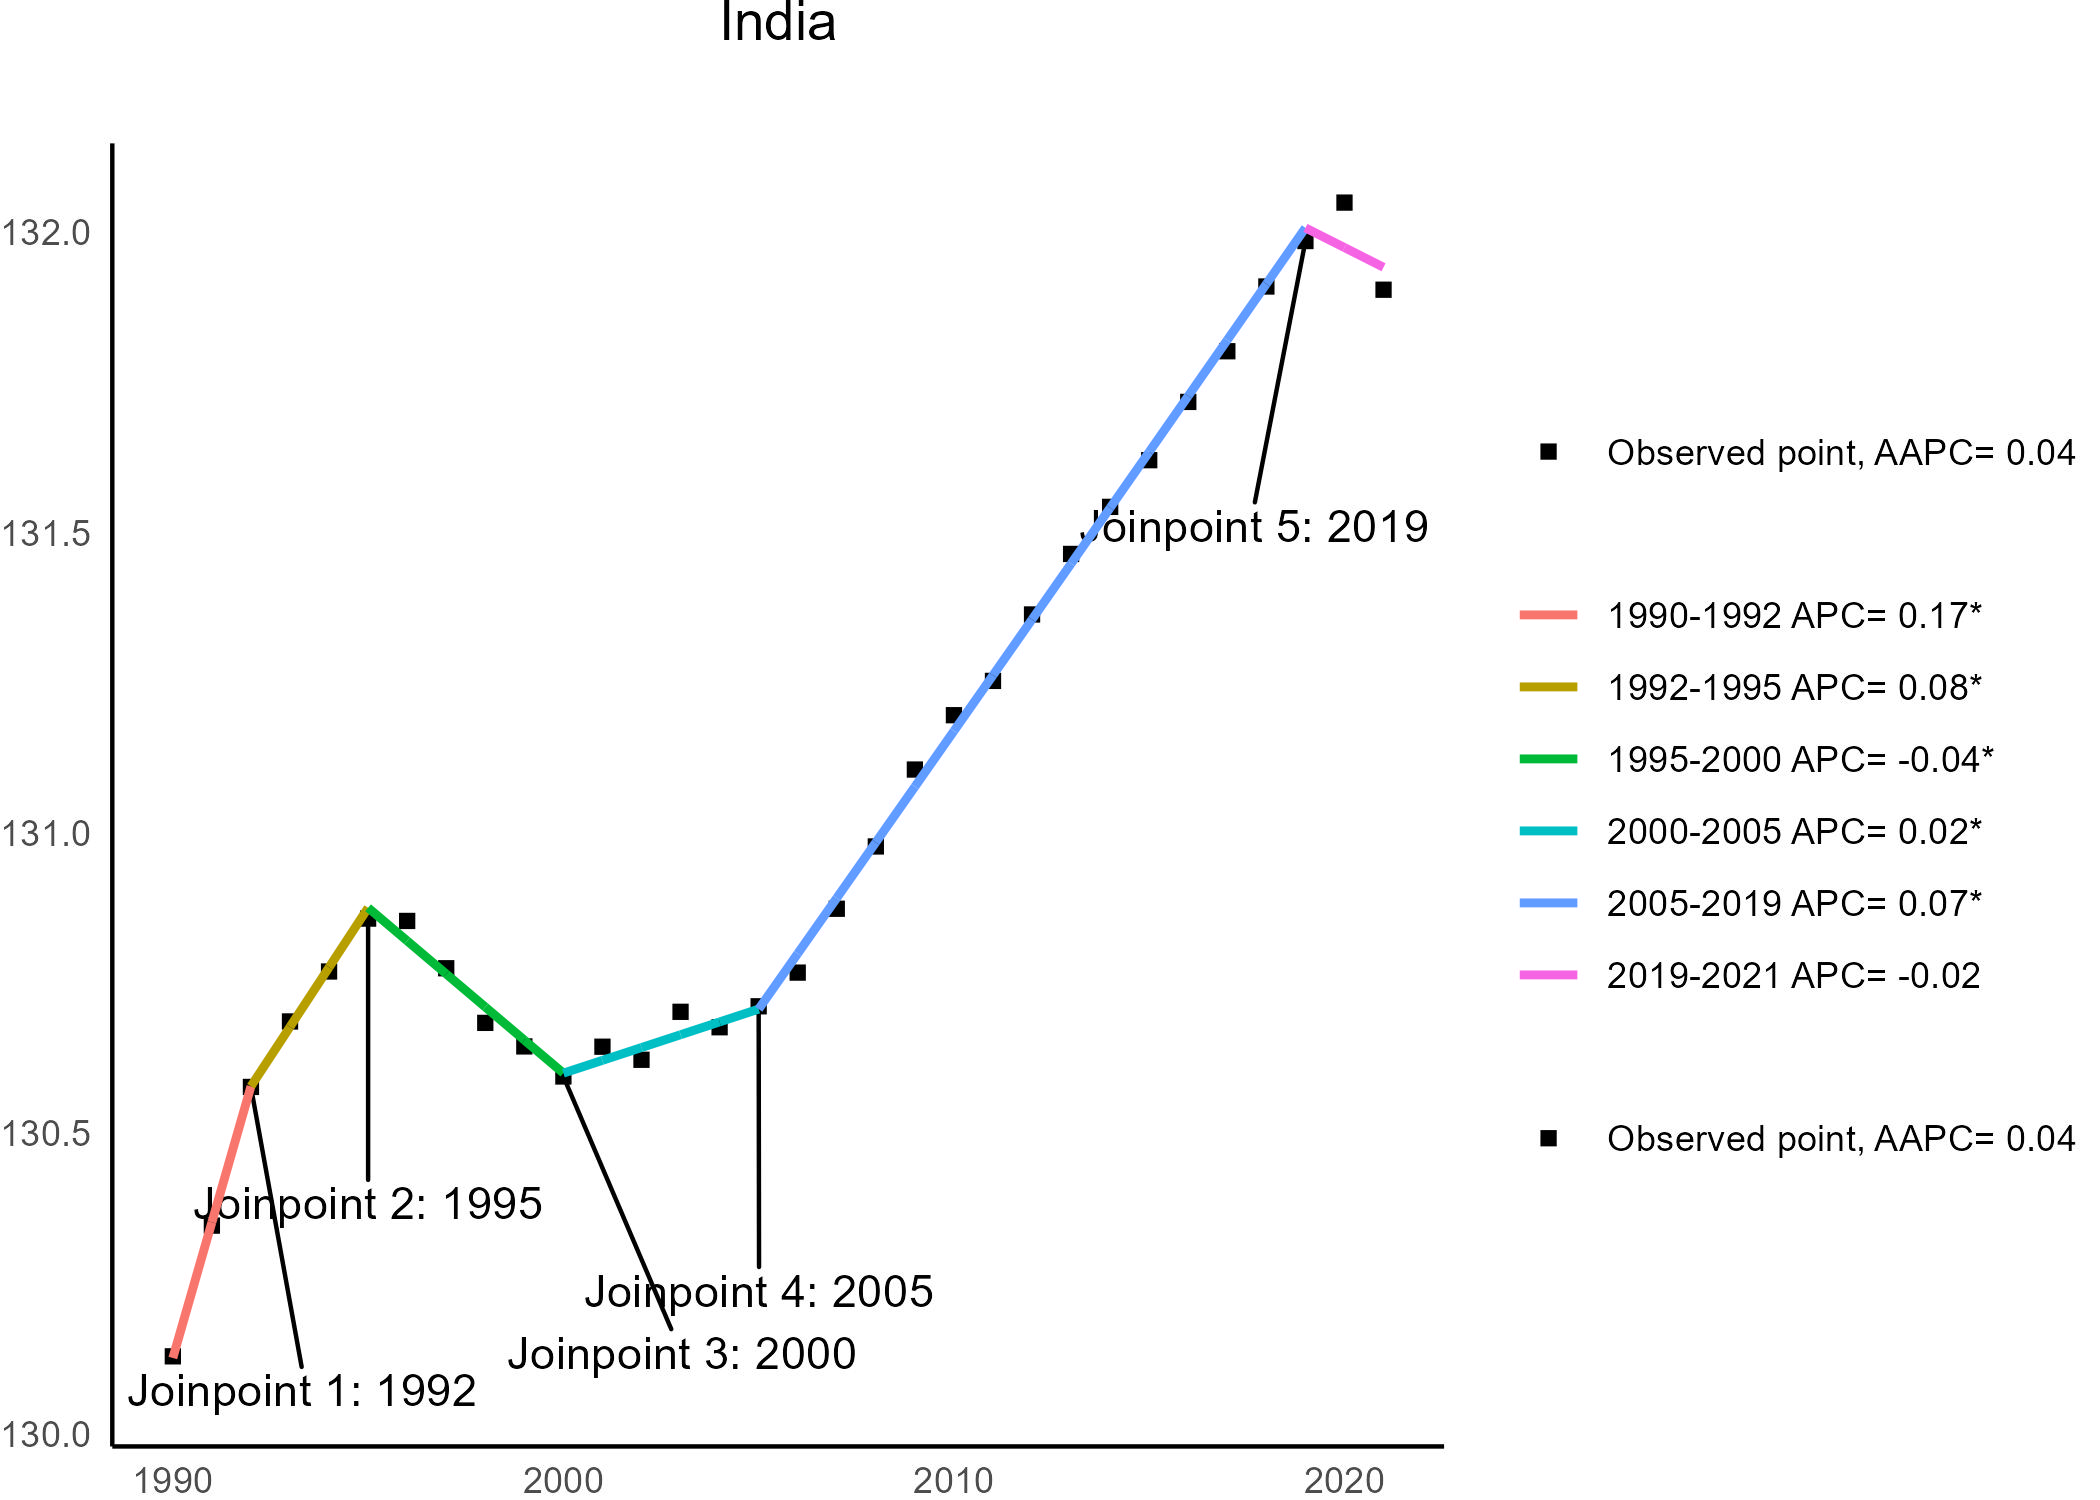

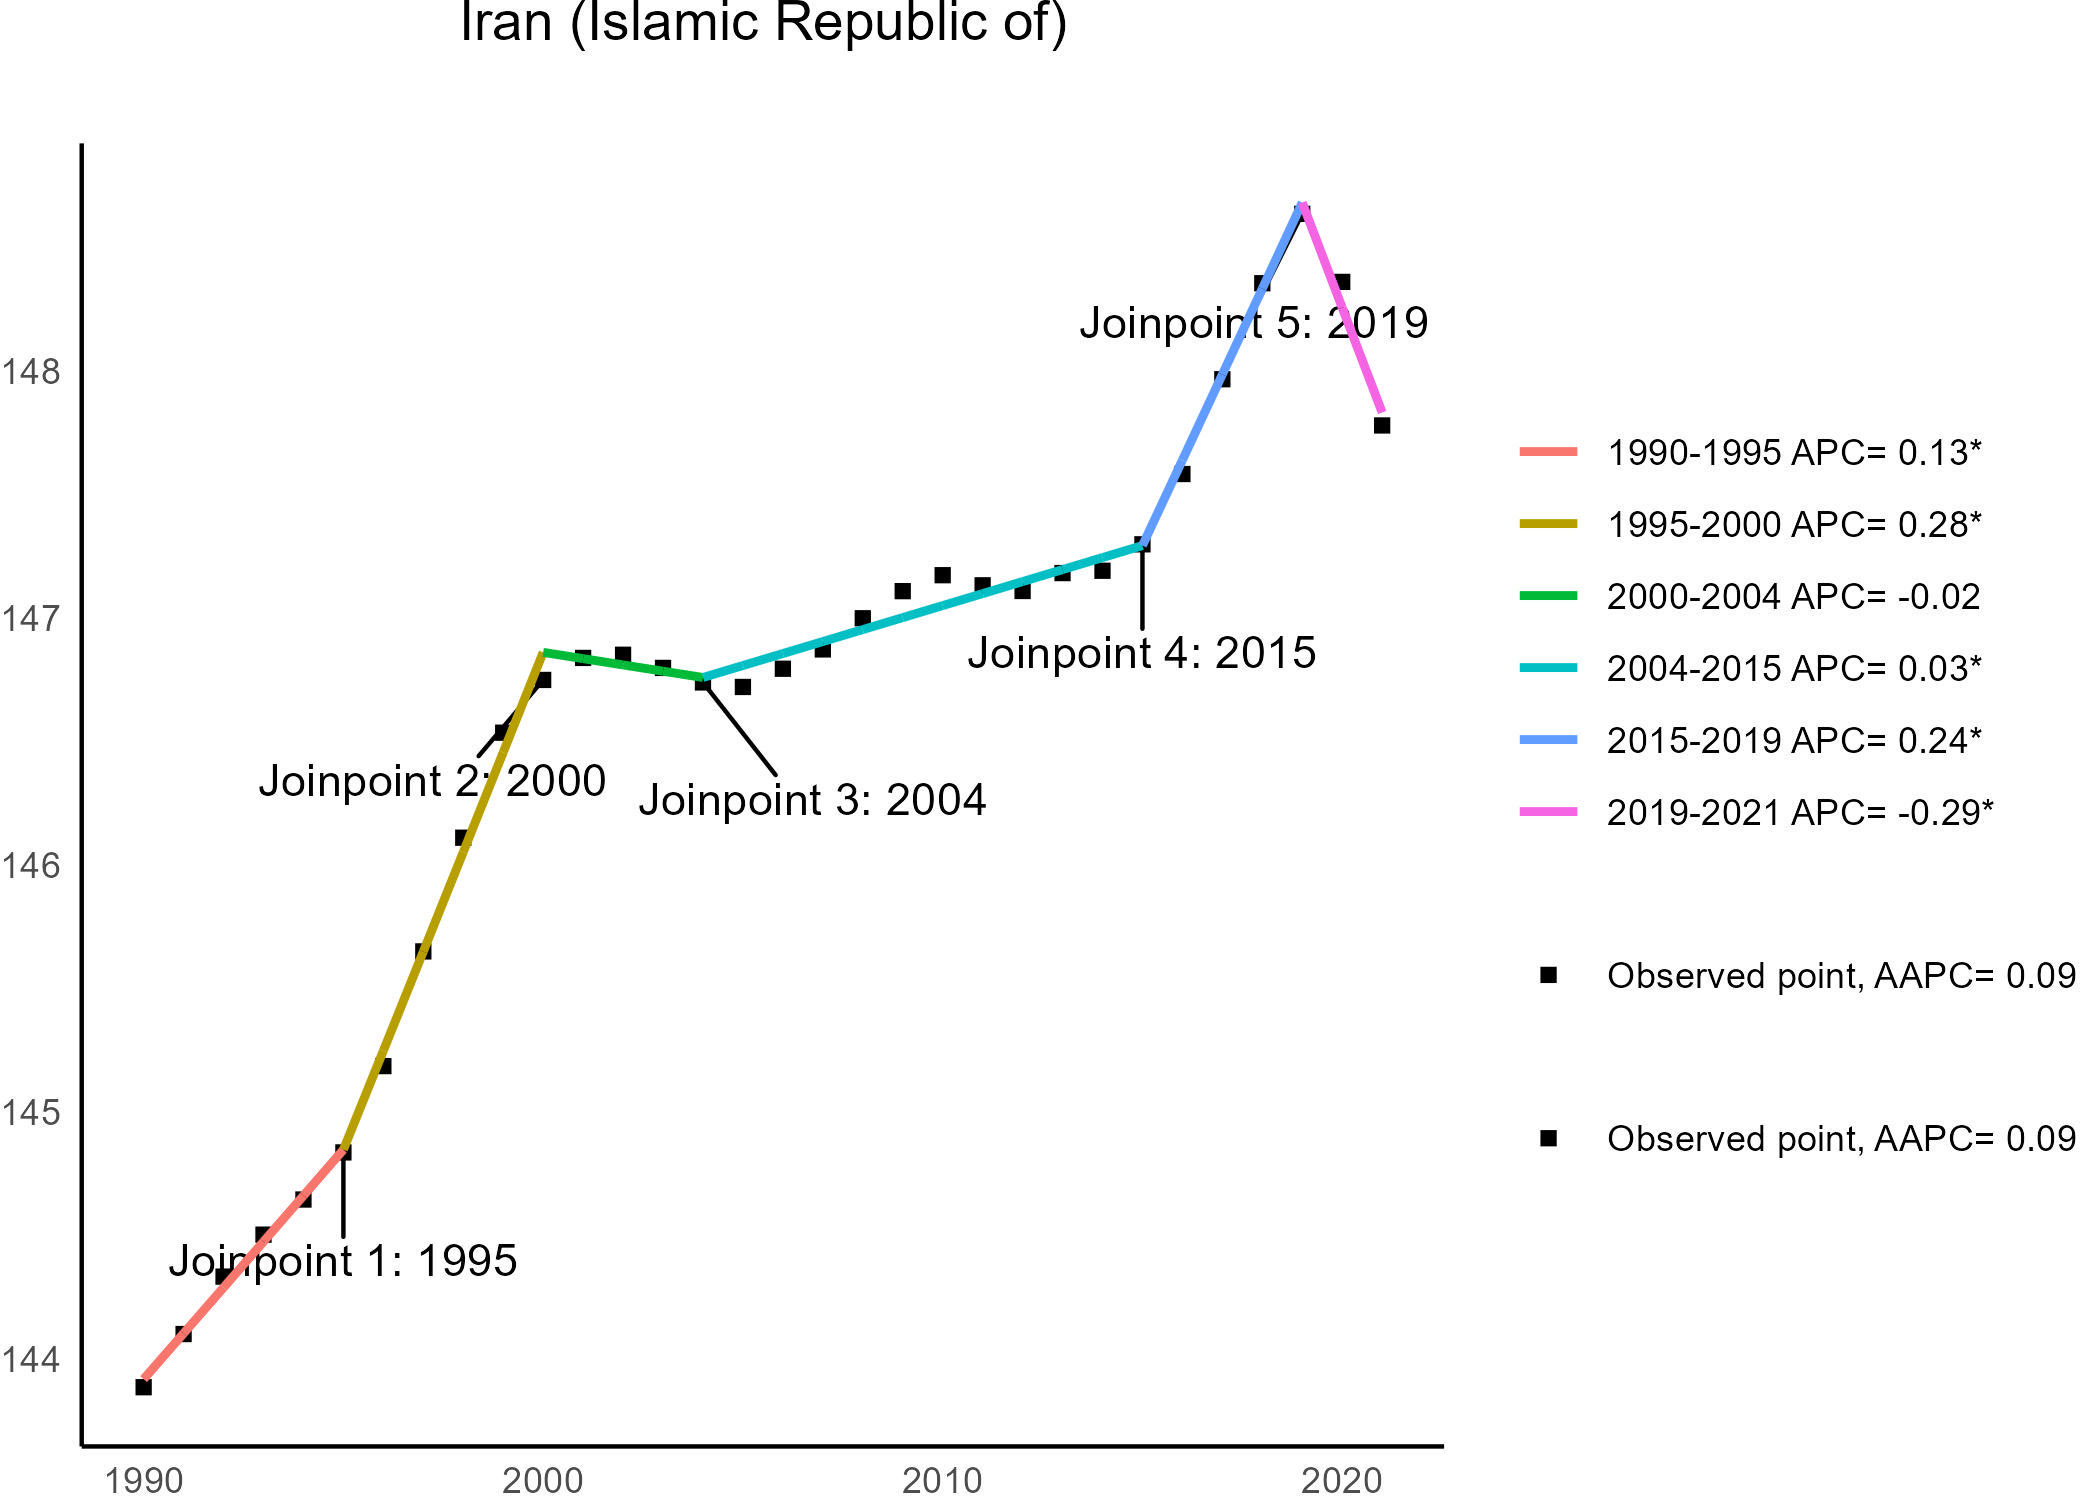

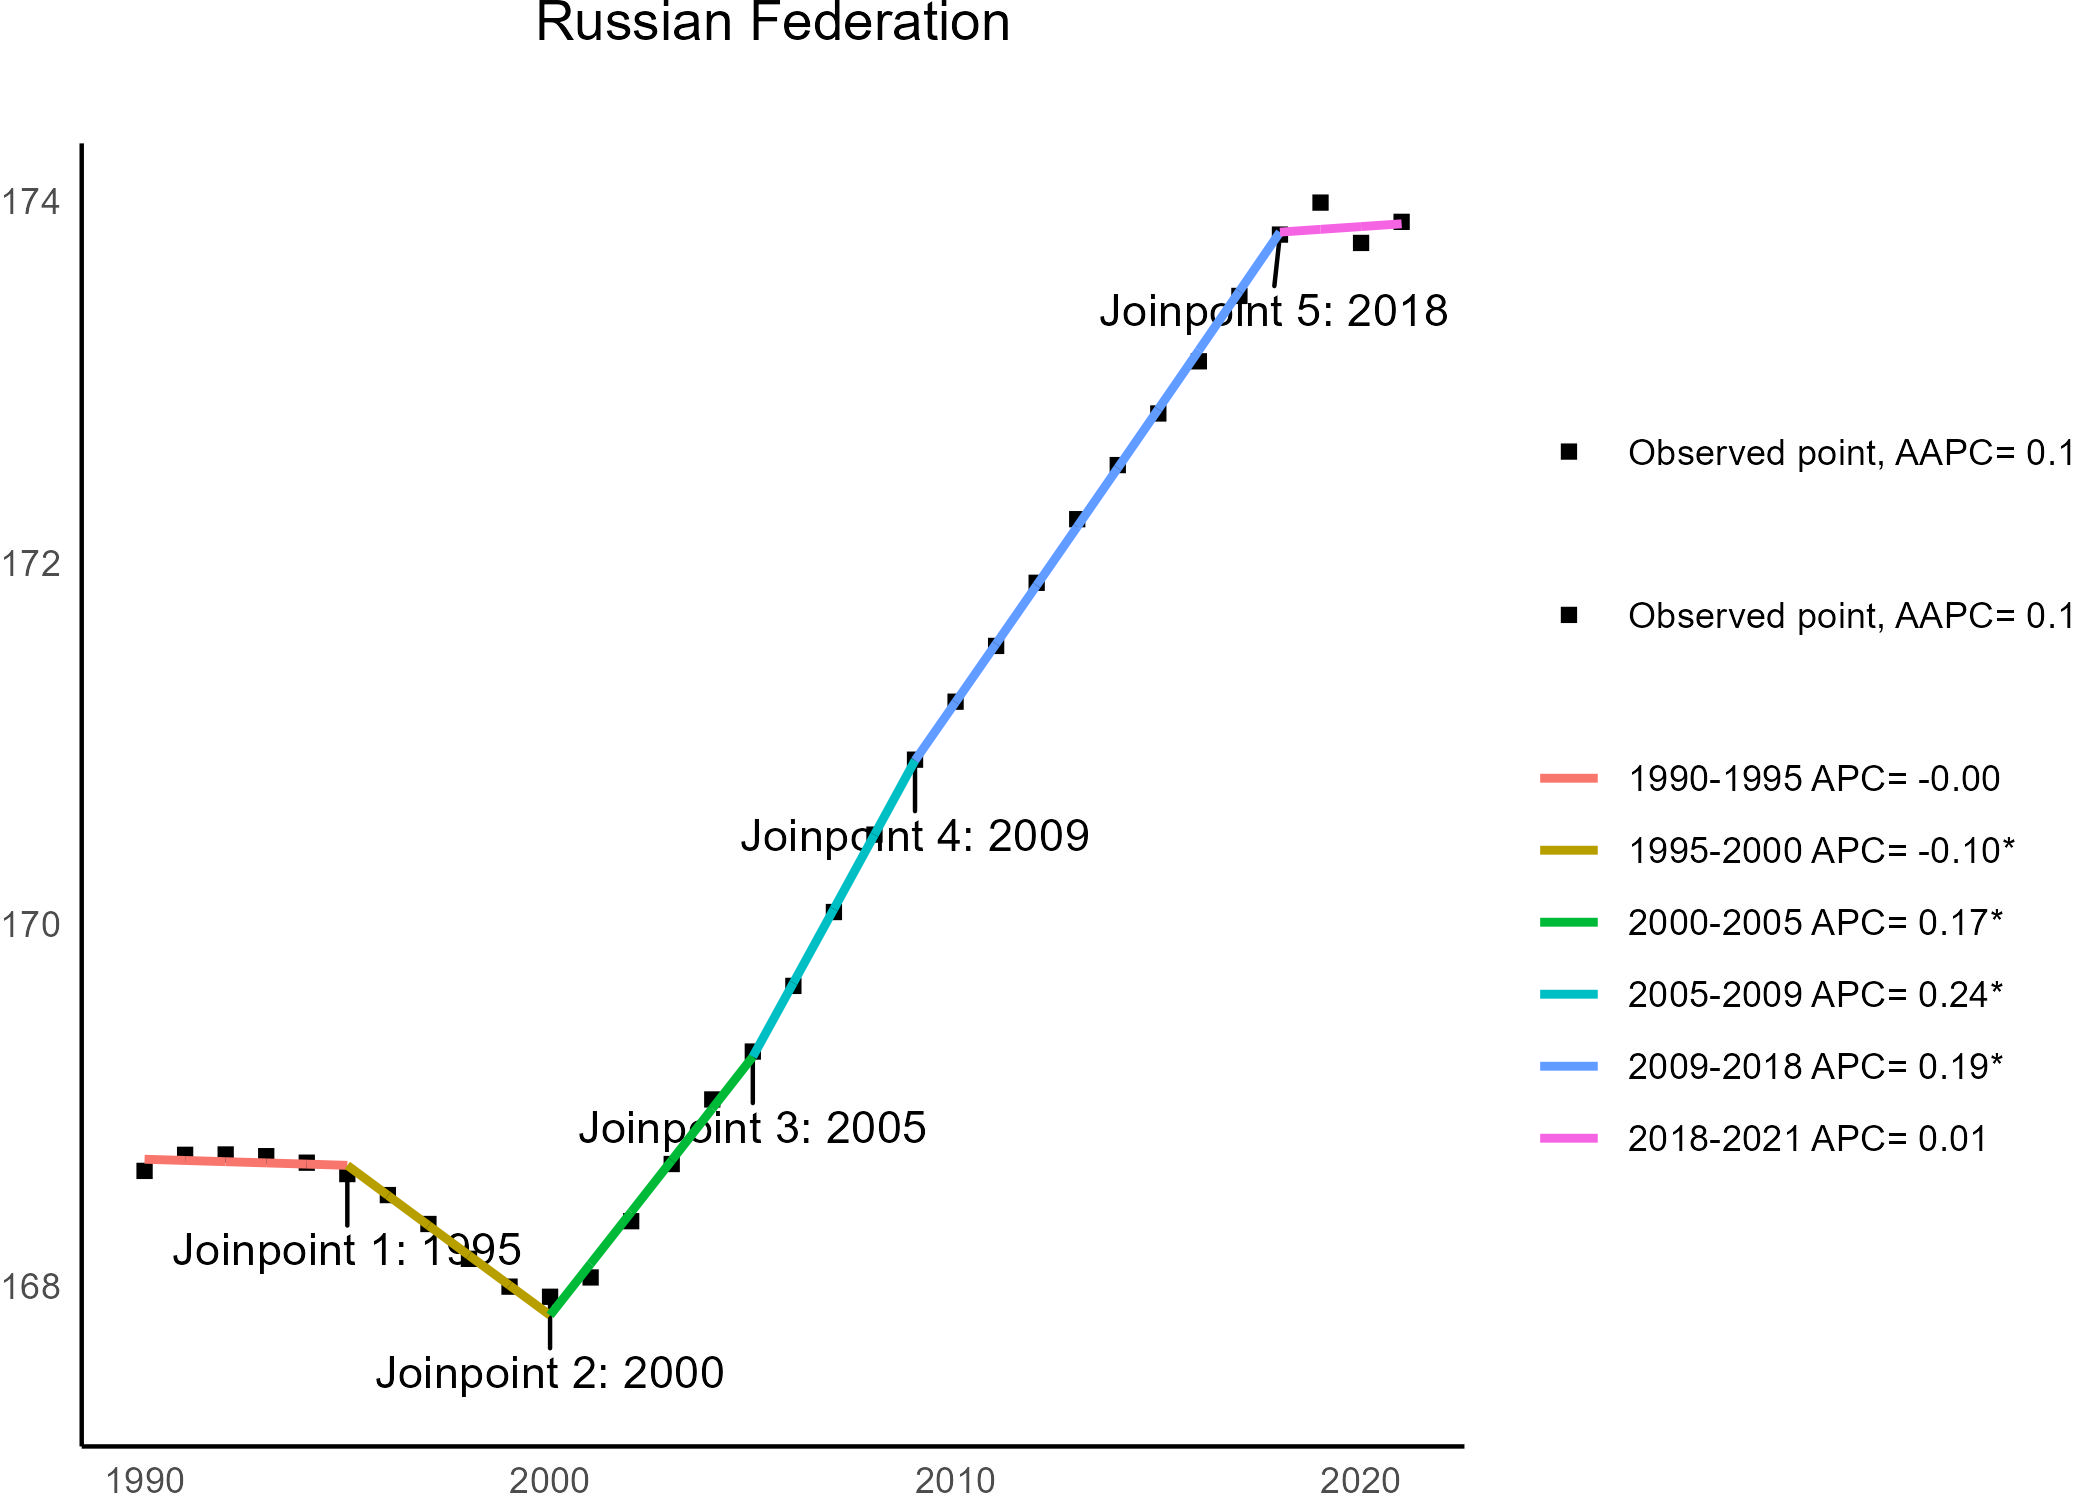

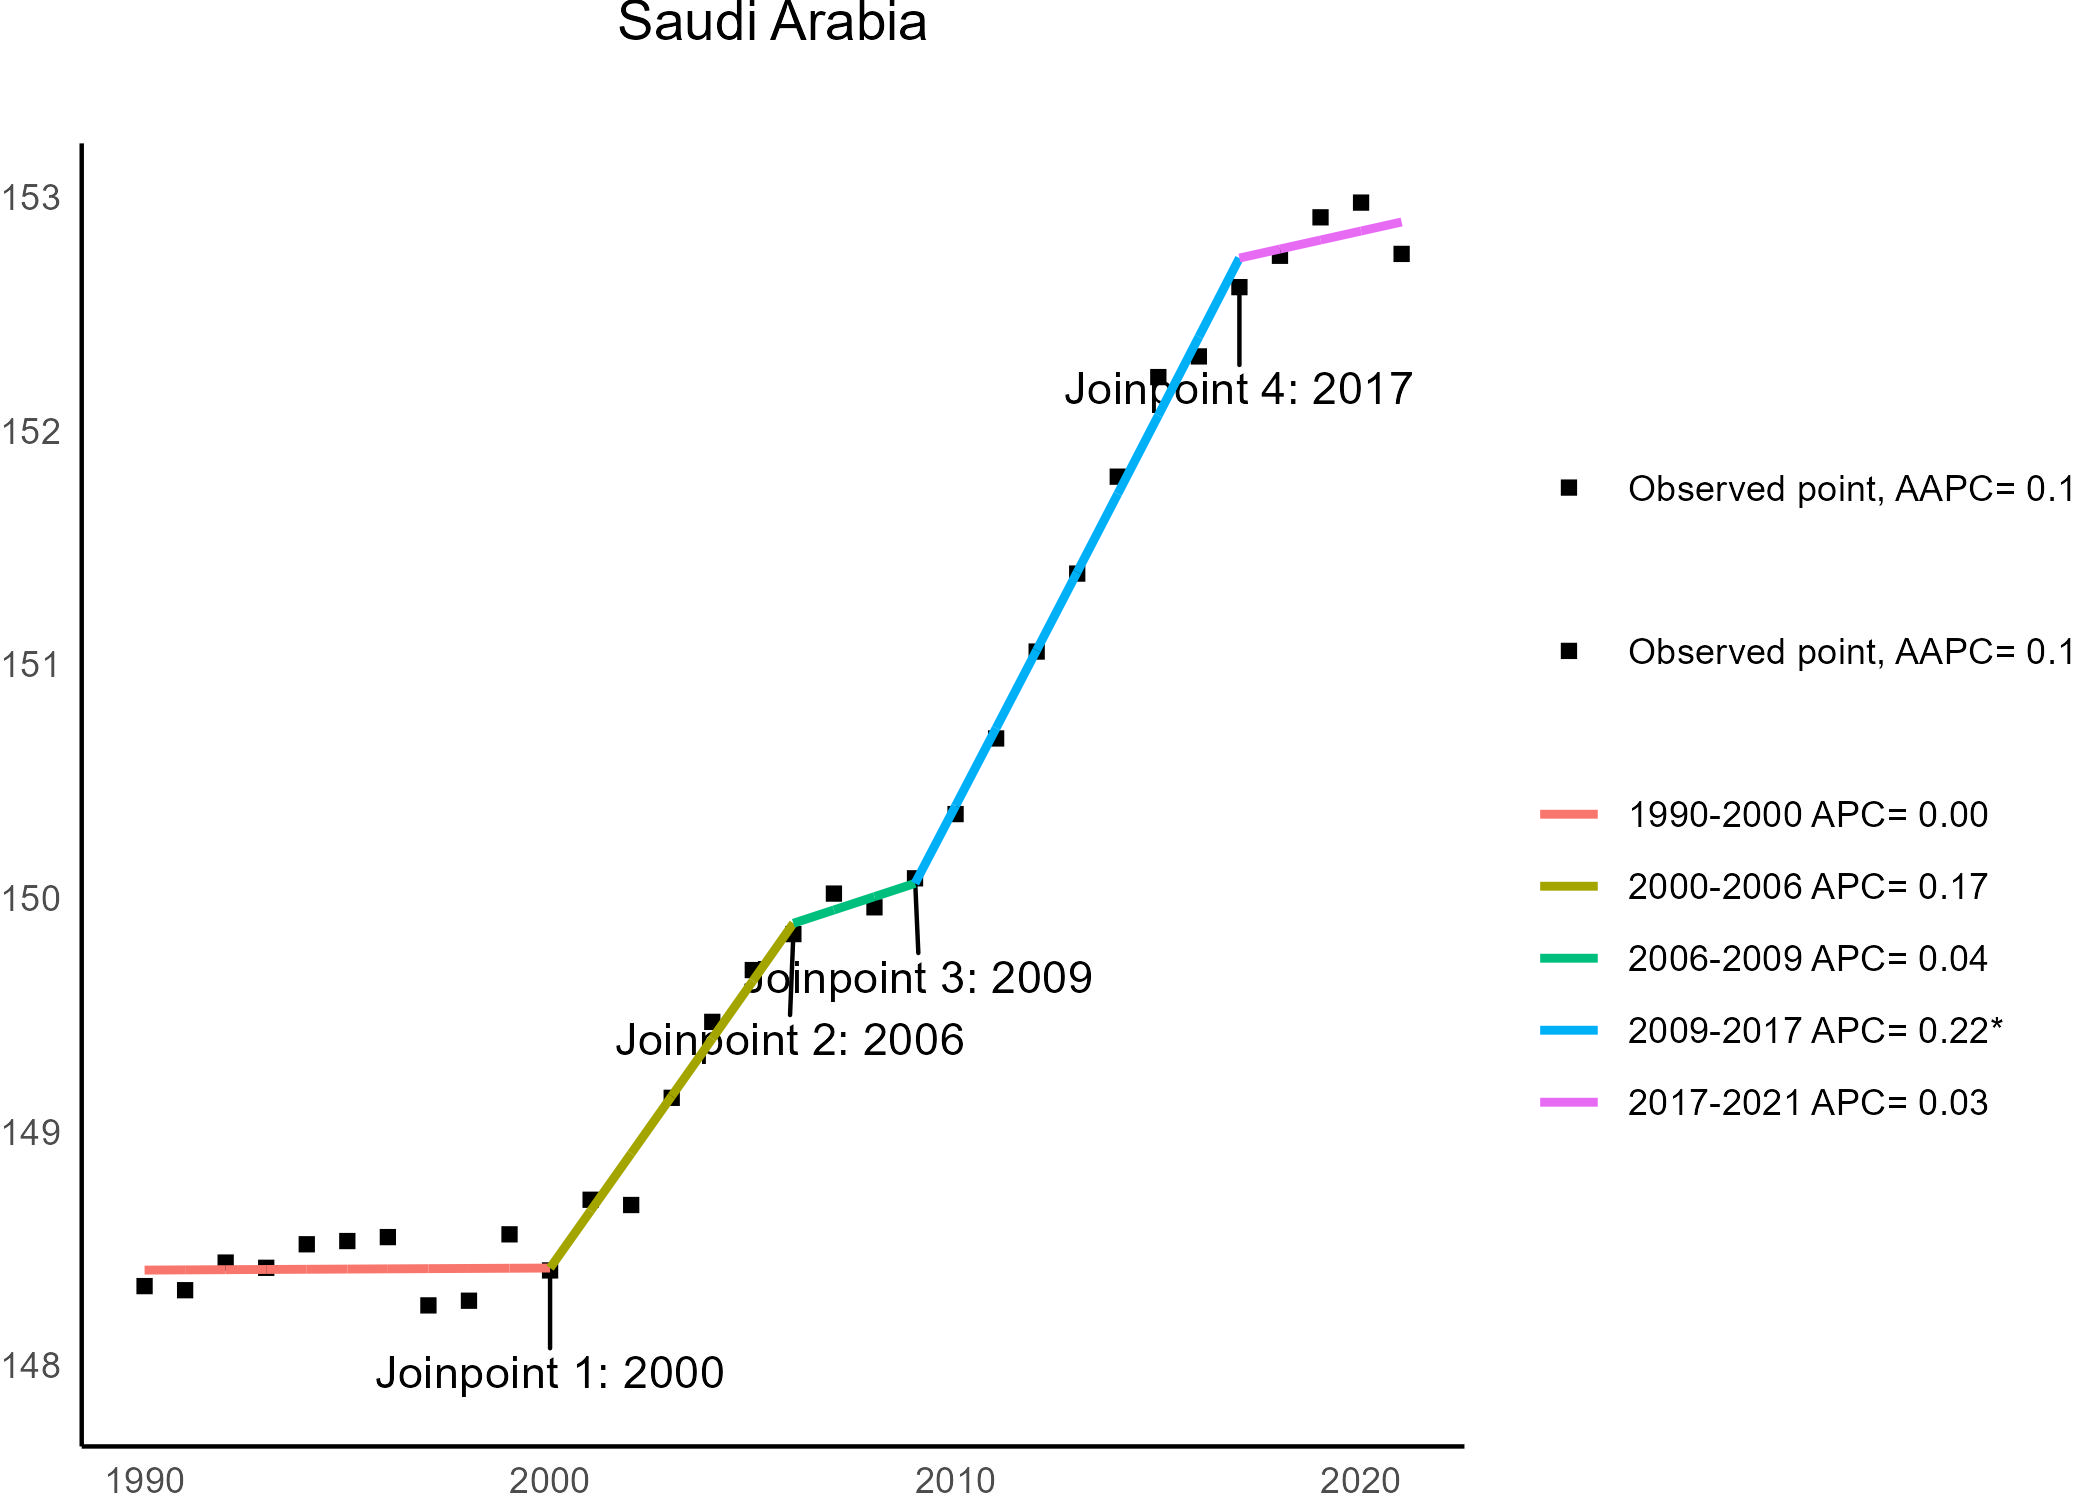

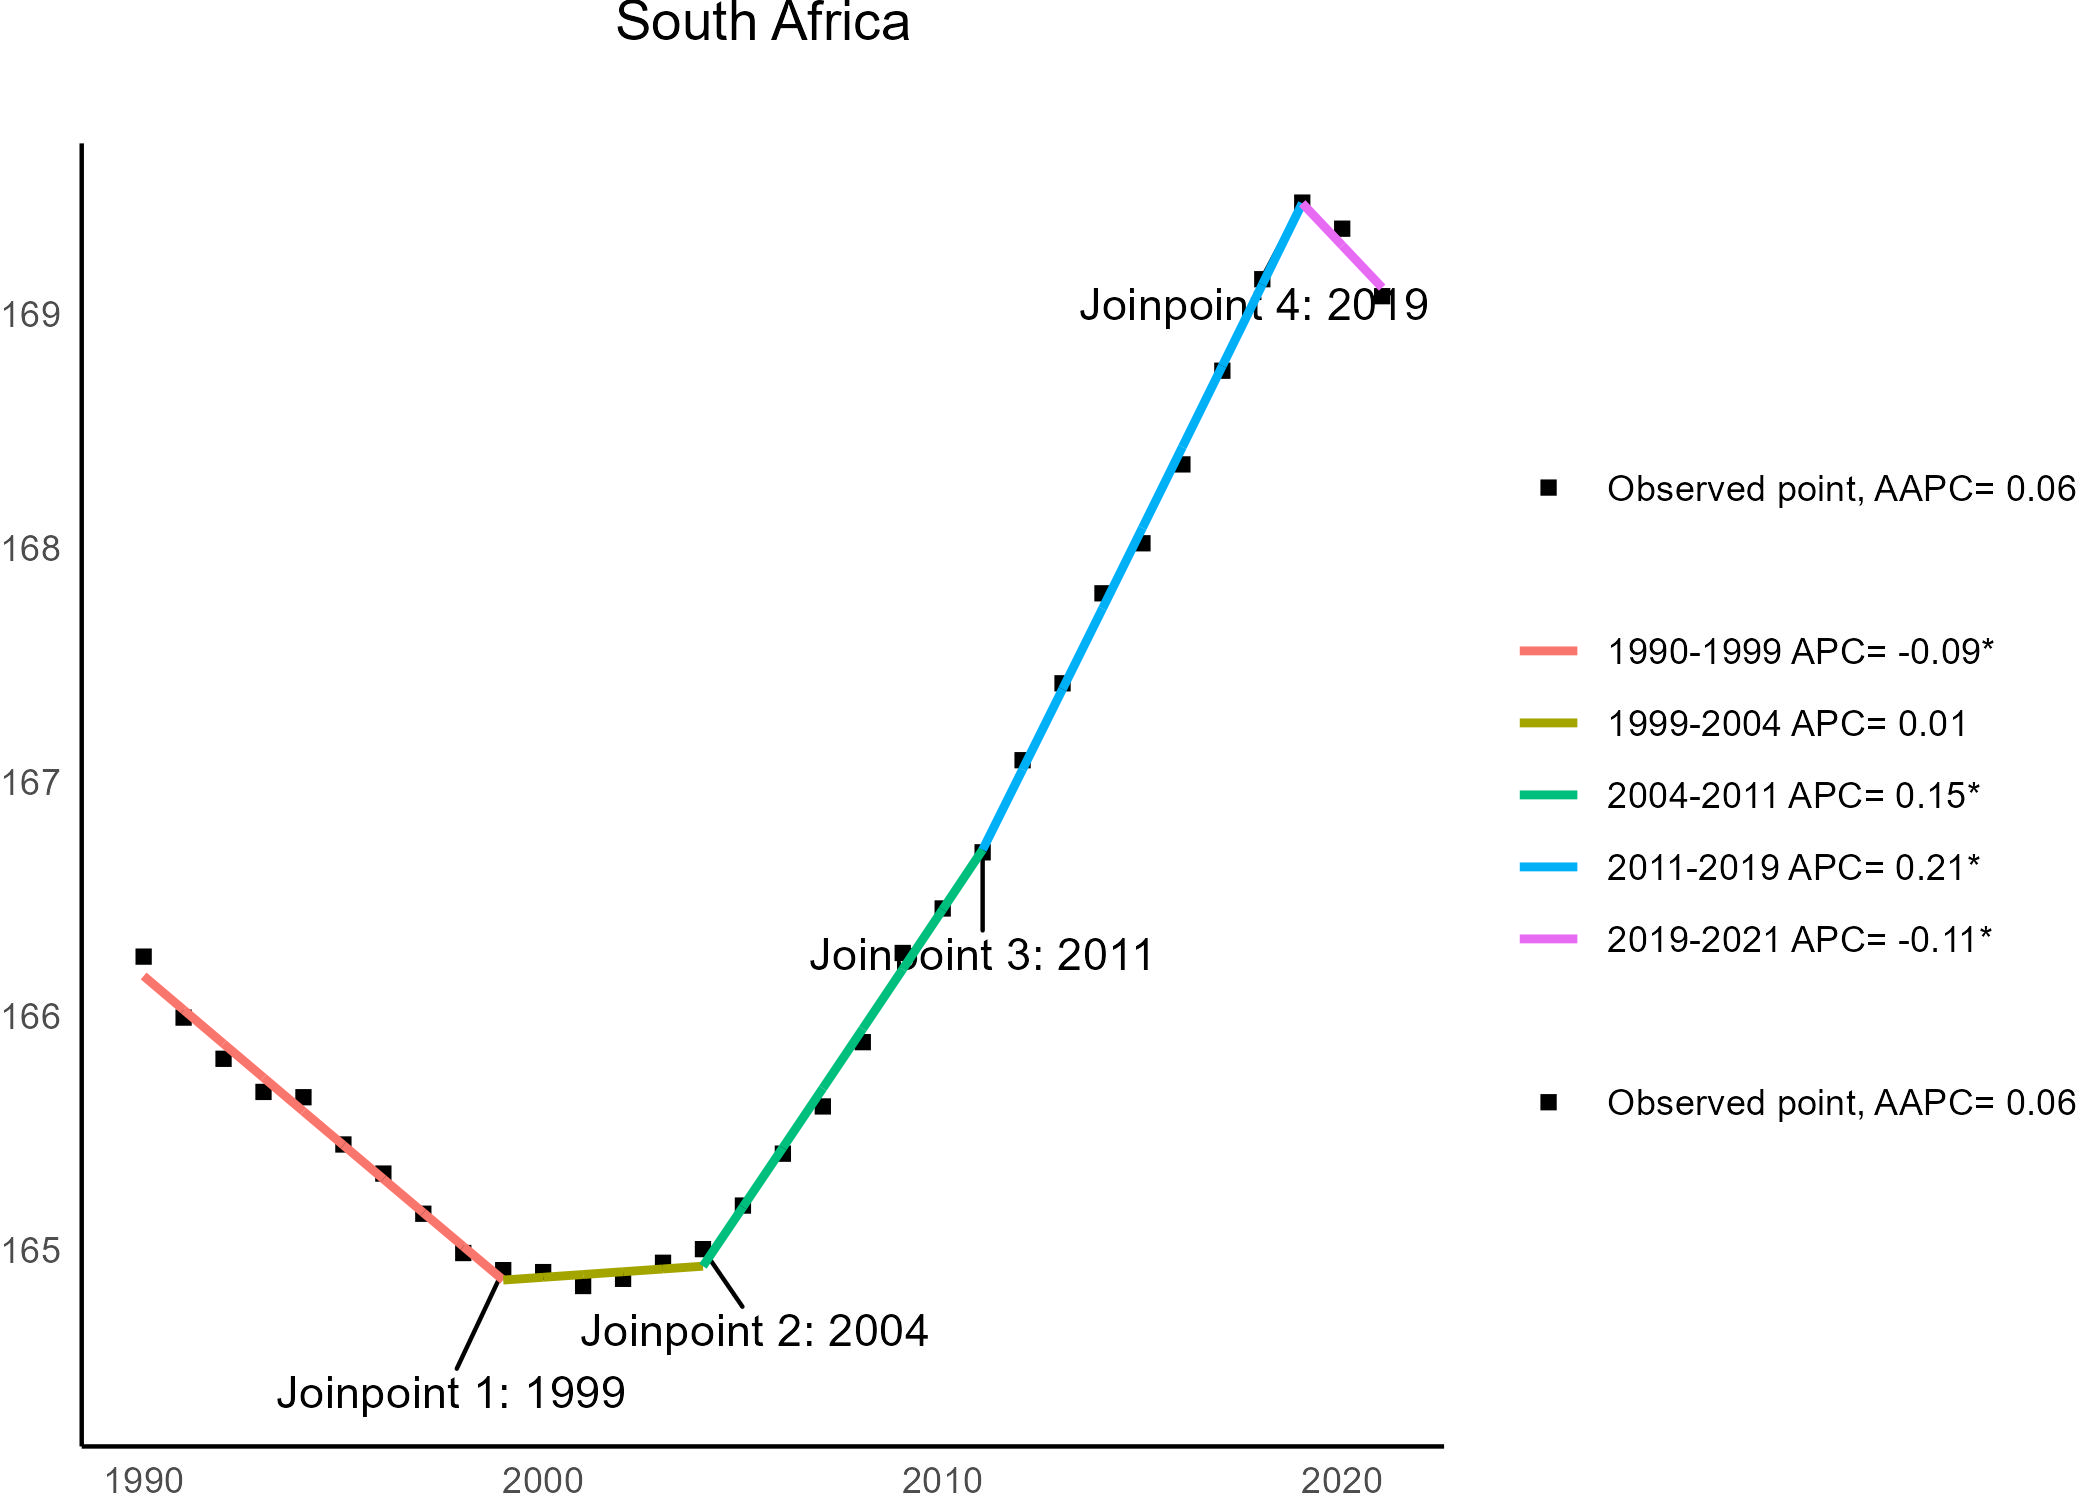

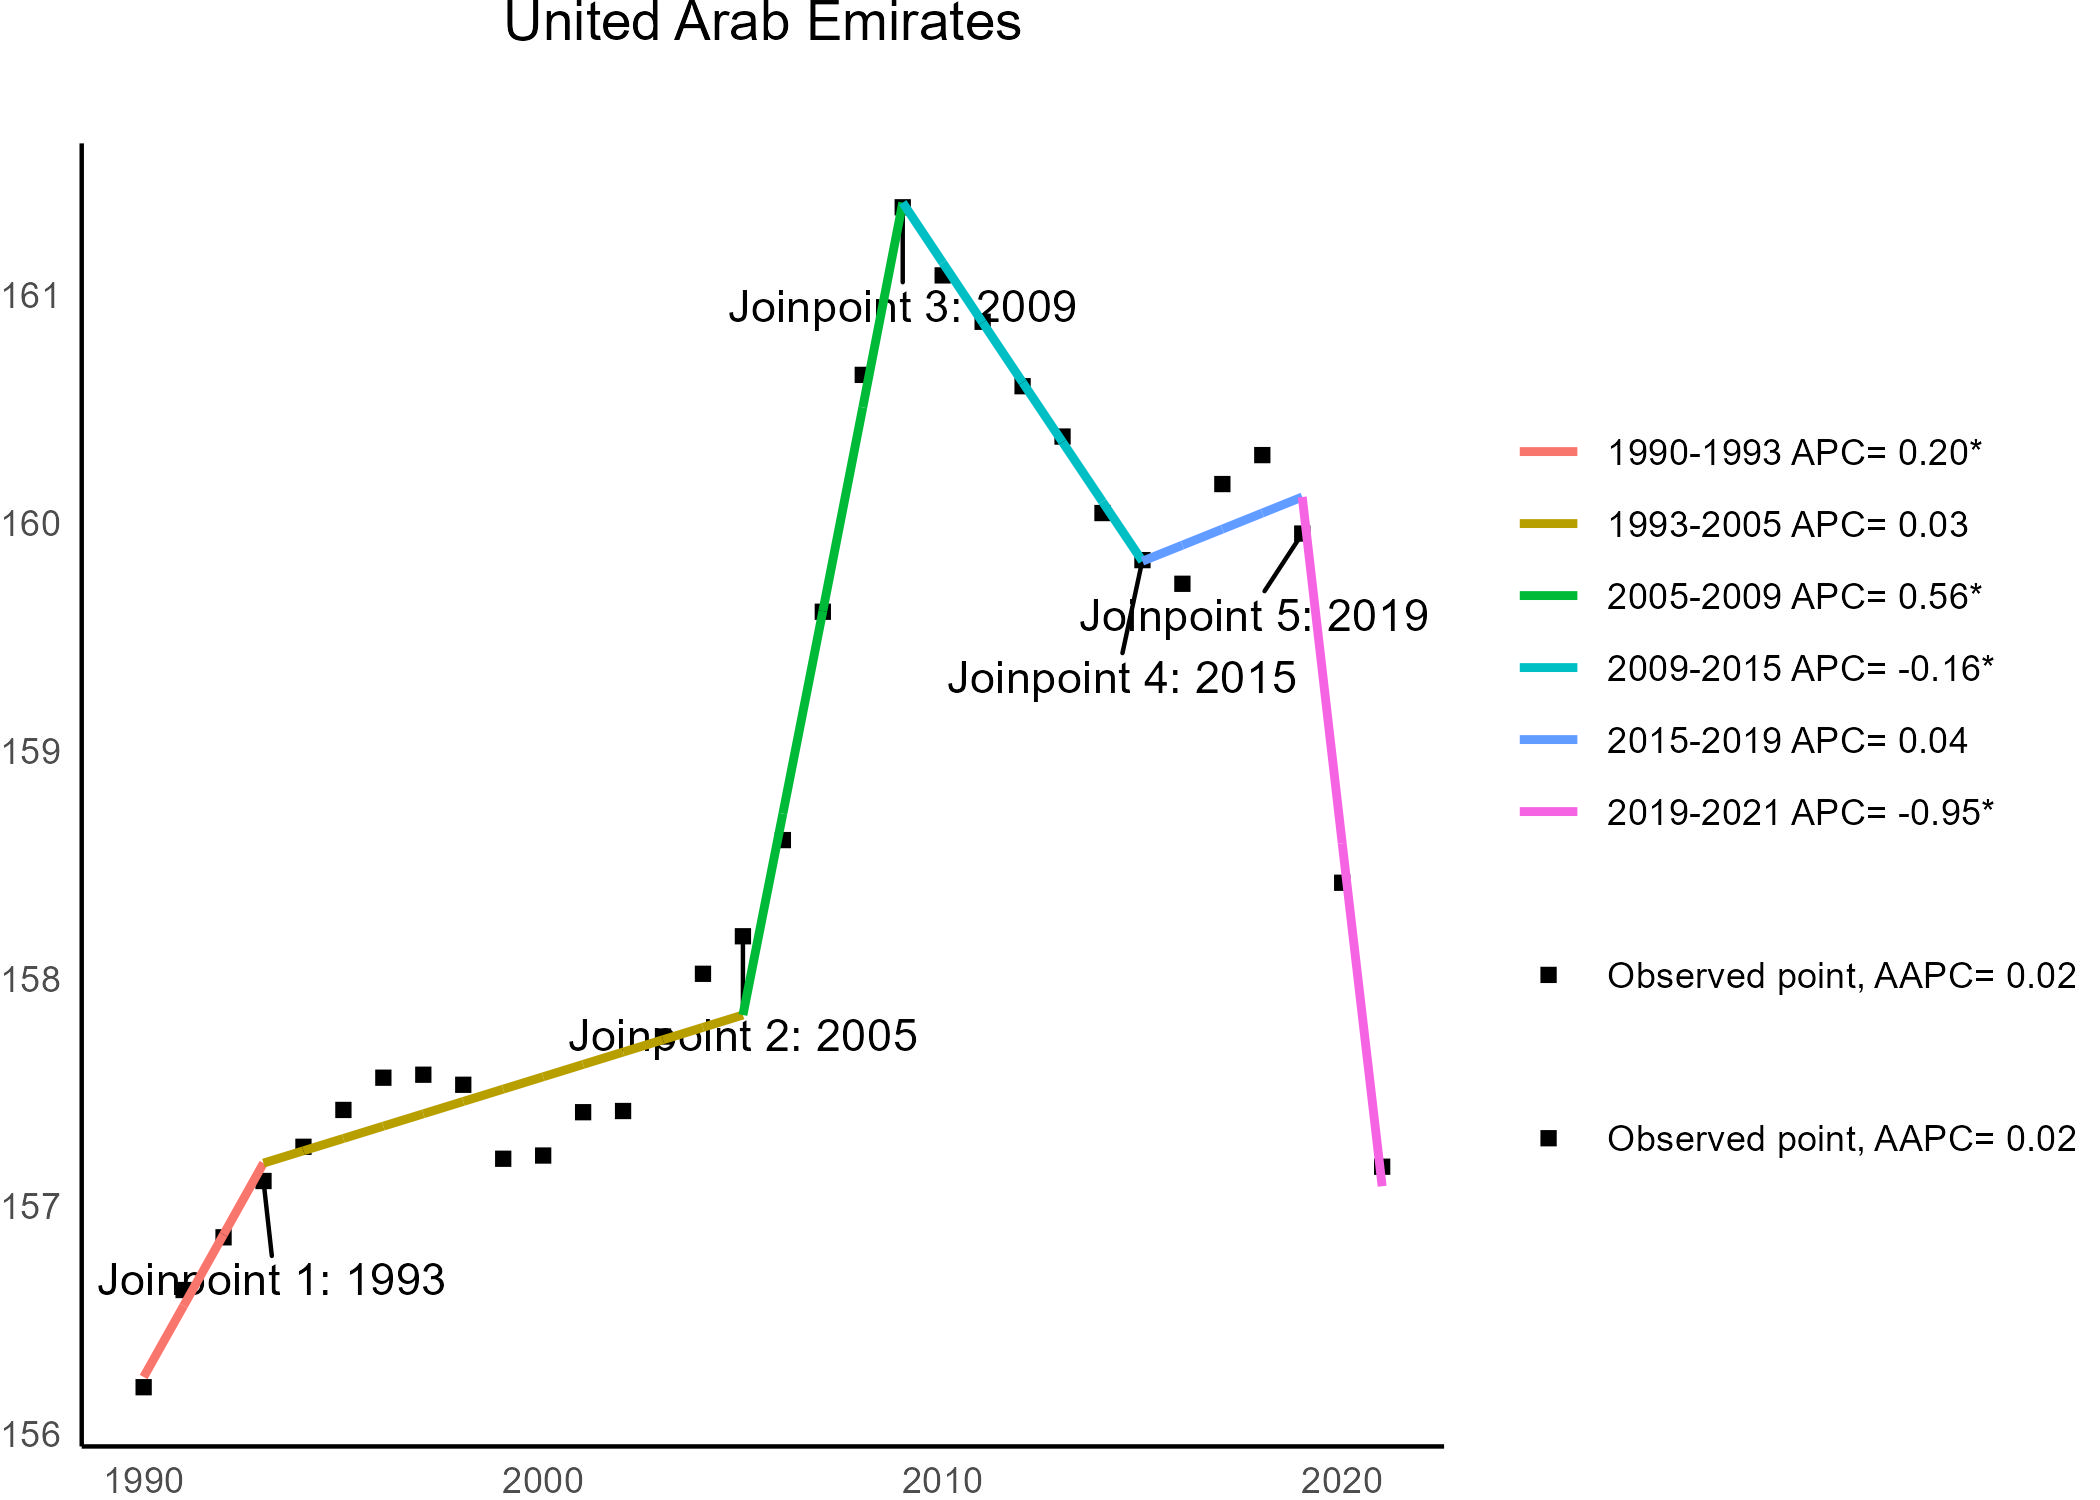

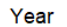

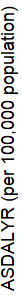


Supplemental Figure_1. DALYs trends of Autism-Spectrum Disorder from 1990 to 2021. Time trends of ASD-related disability-adjusted life years (DALYs), with AAPC indicating average annual percent change across countries.

DALYs: Disability Adjusted Life Years, ASDALYR: Age-standardized DALYs rate, AAPC: Average Annual Percentage Change, APC: Annual Percentage Change, BRICS: Brazil, Russian Federation, India, China, South Africa, Egypt, Ethiopia, Saudi Arabia, Iran, United Arab Emirates.


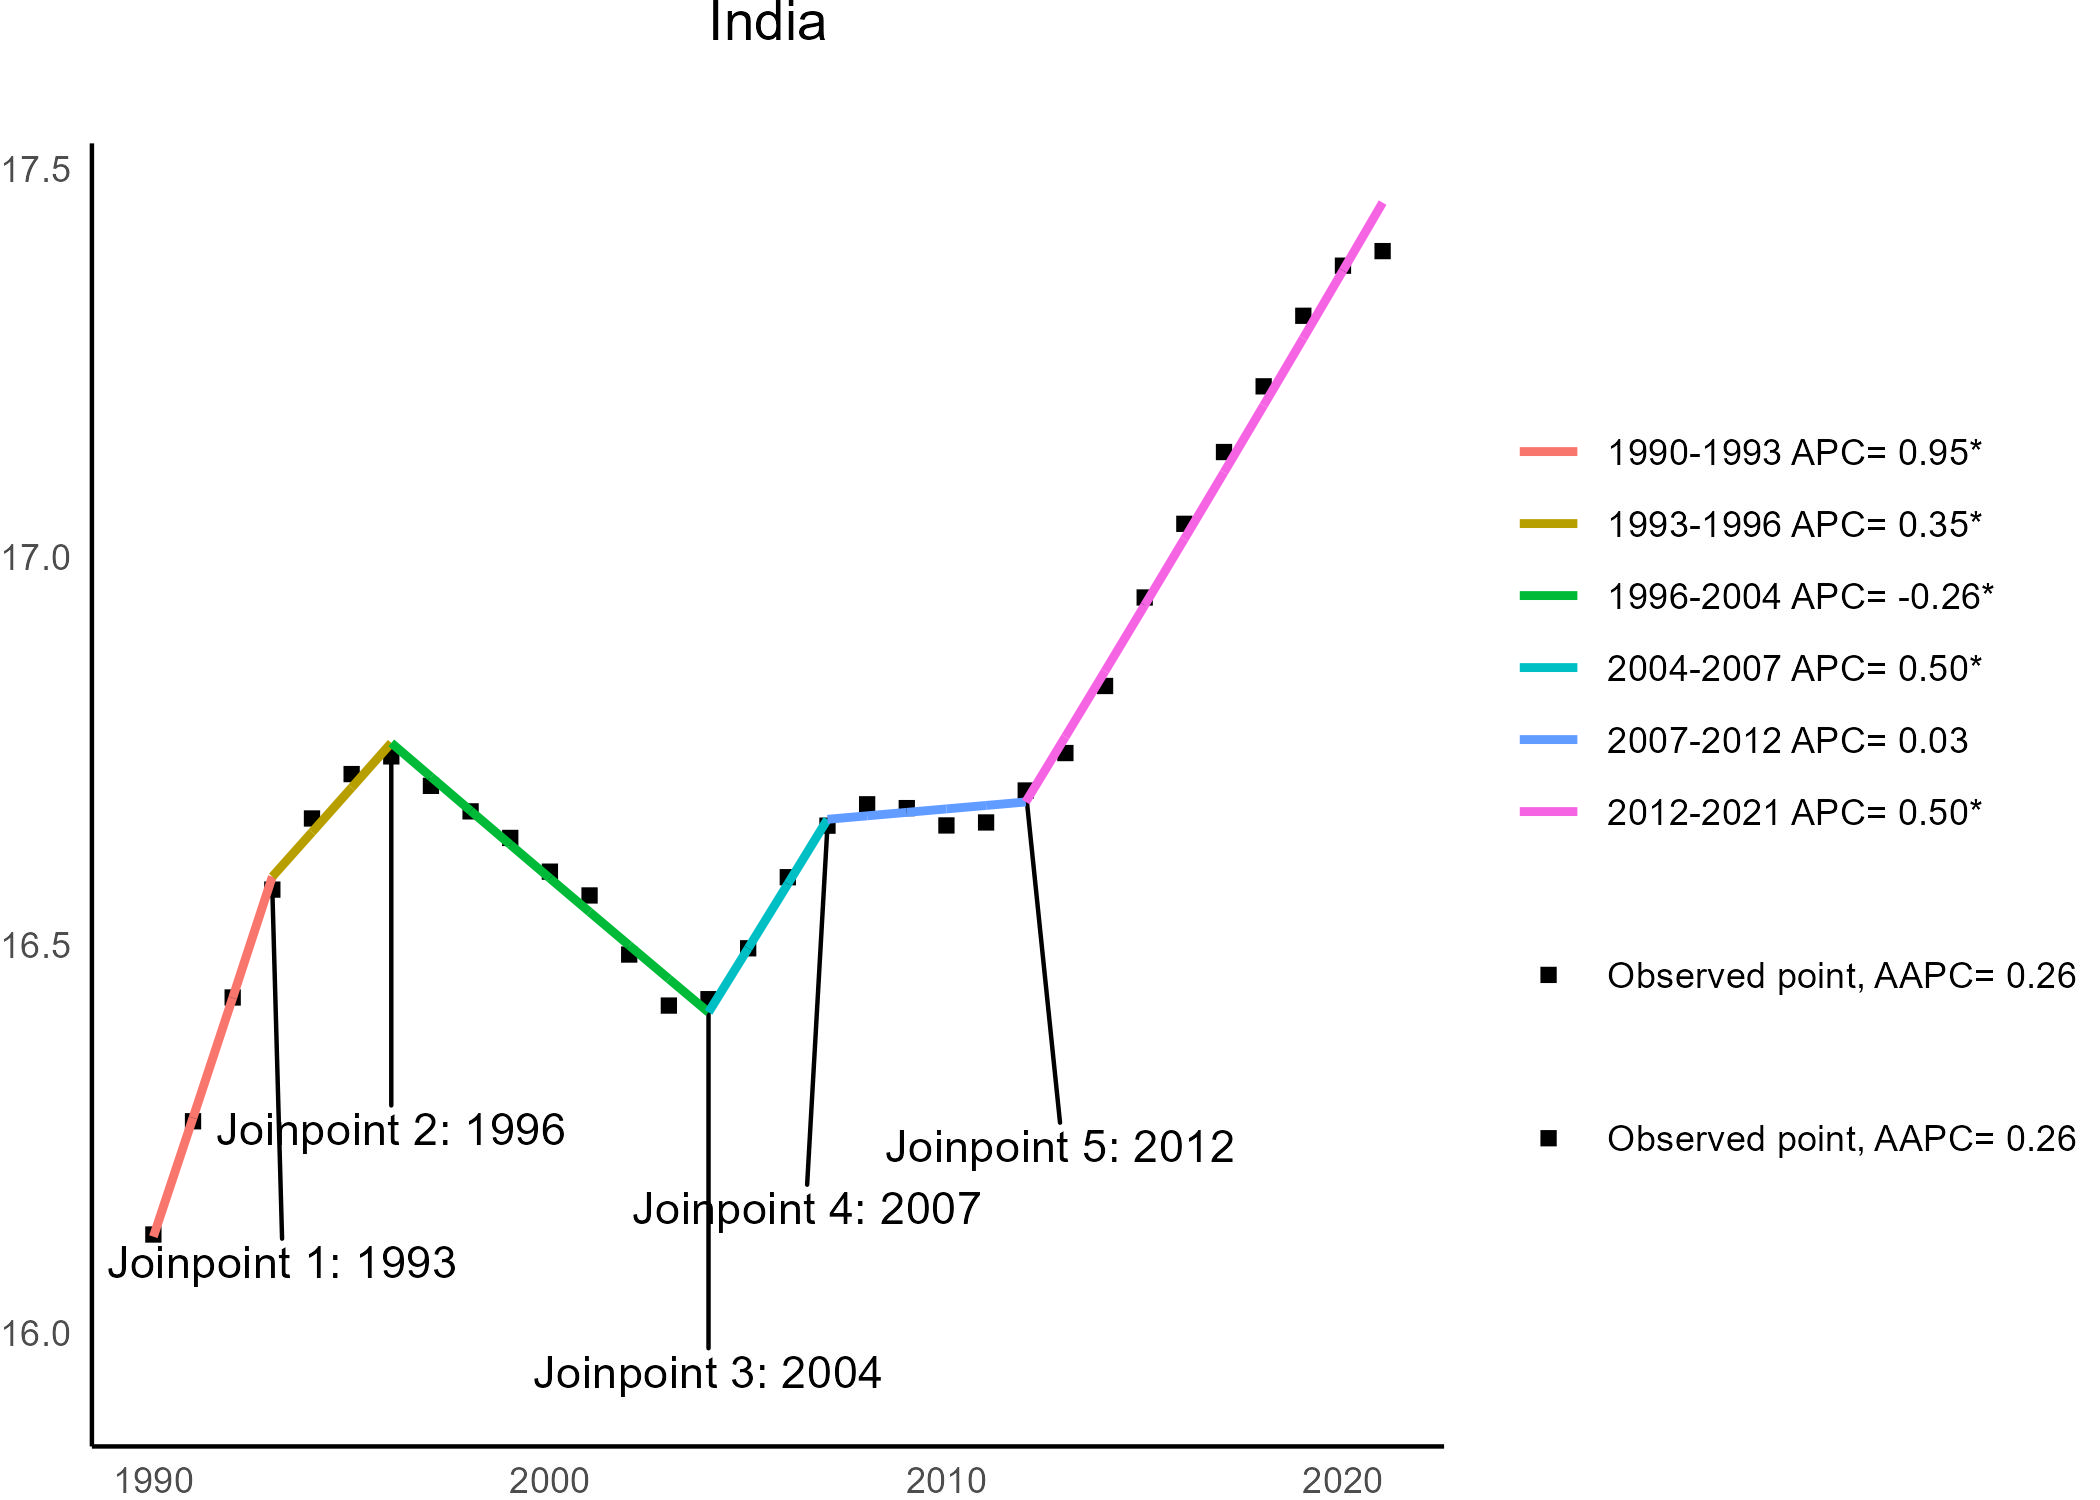

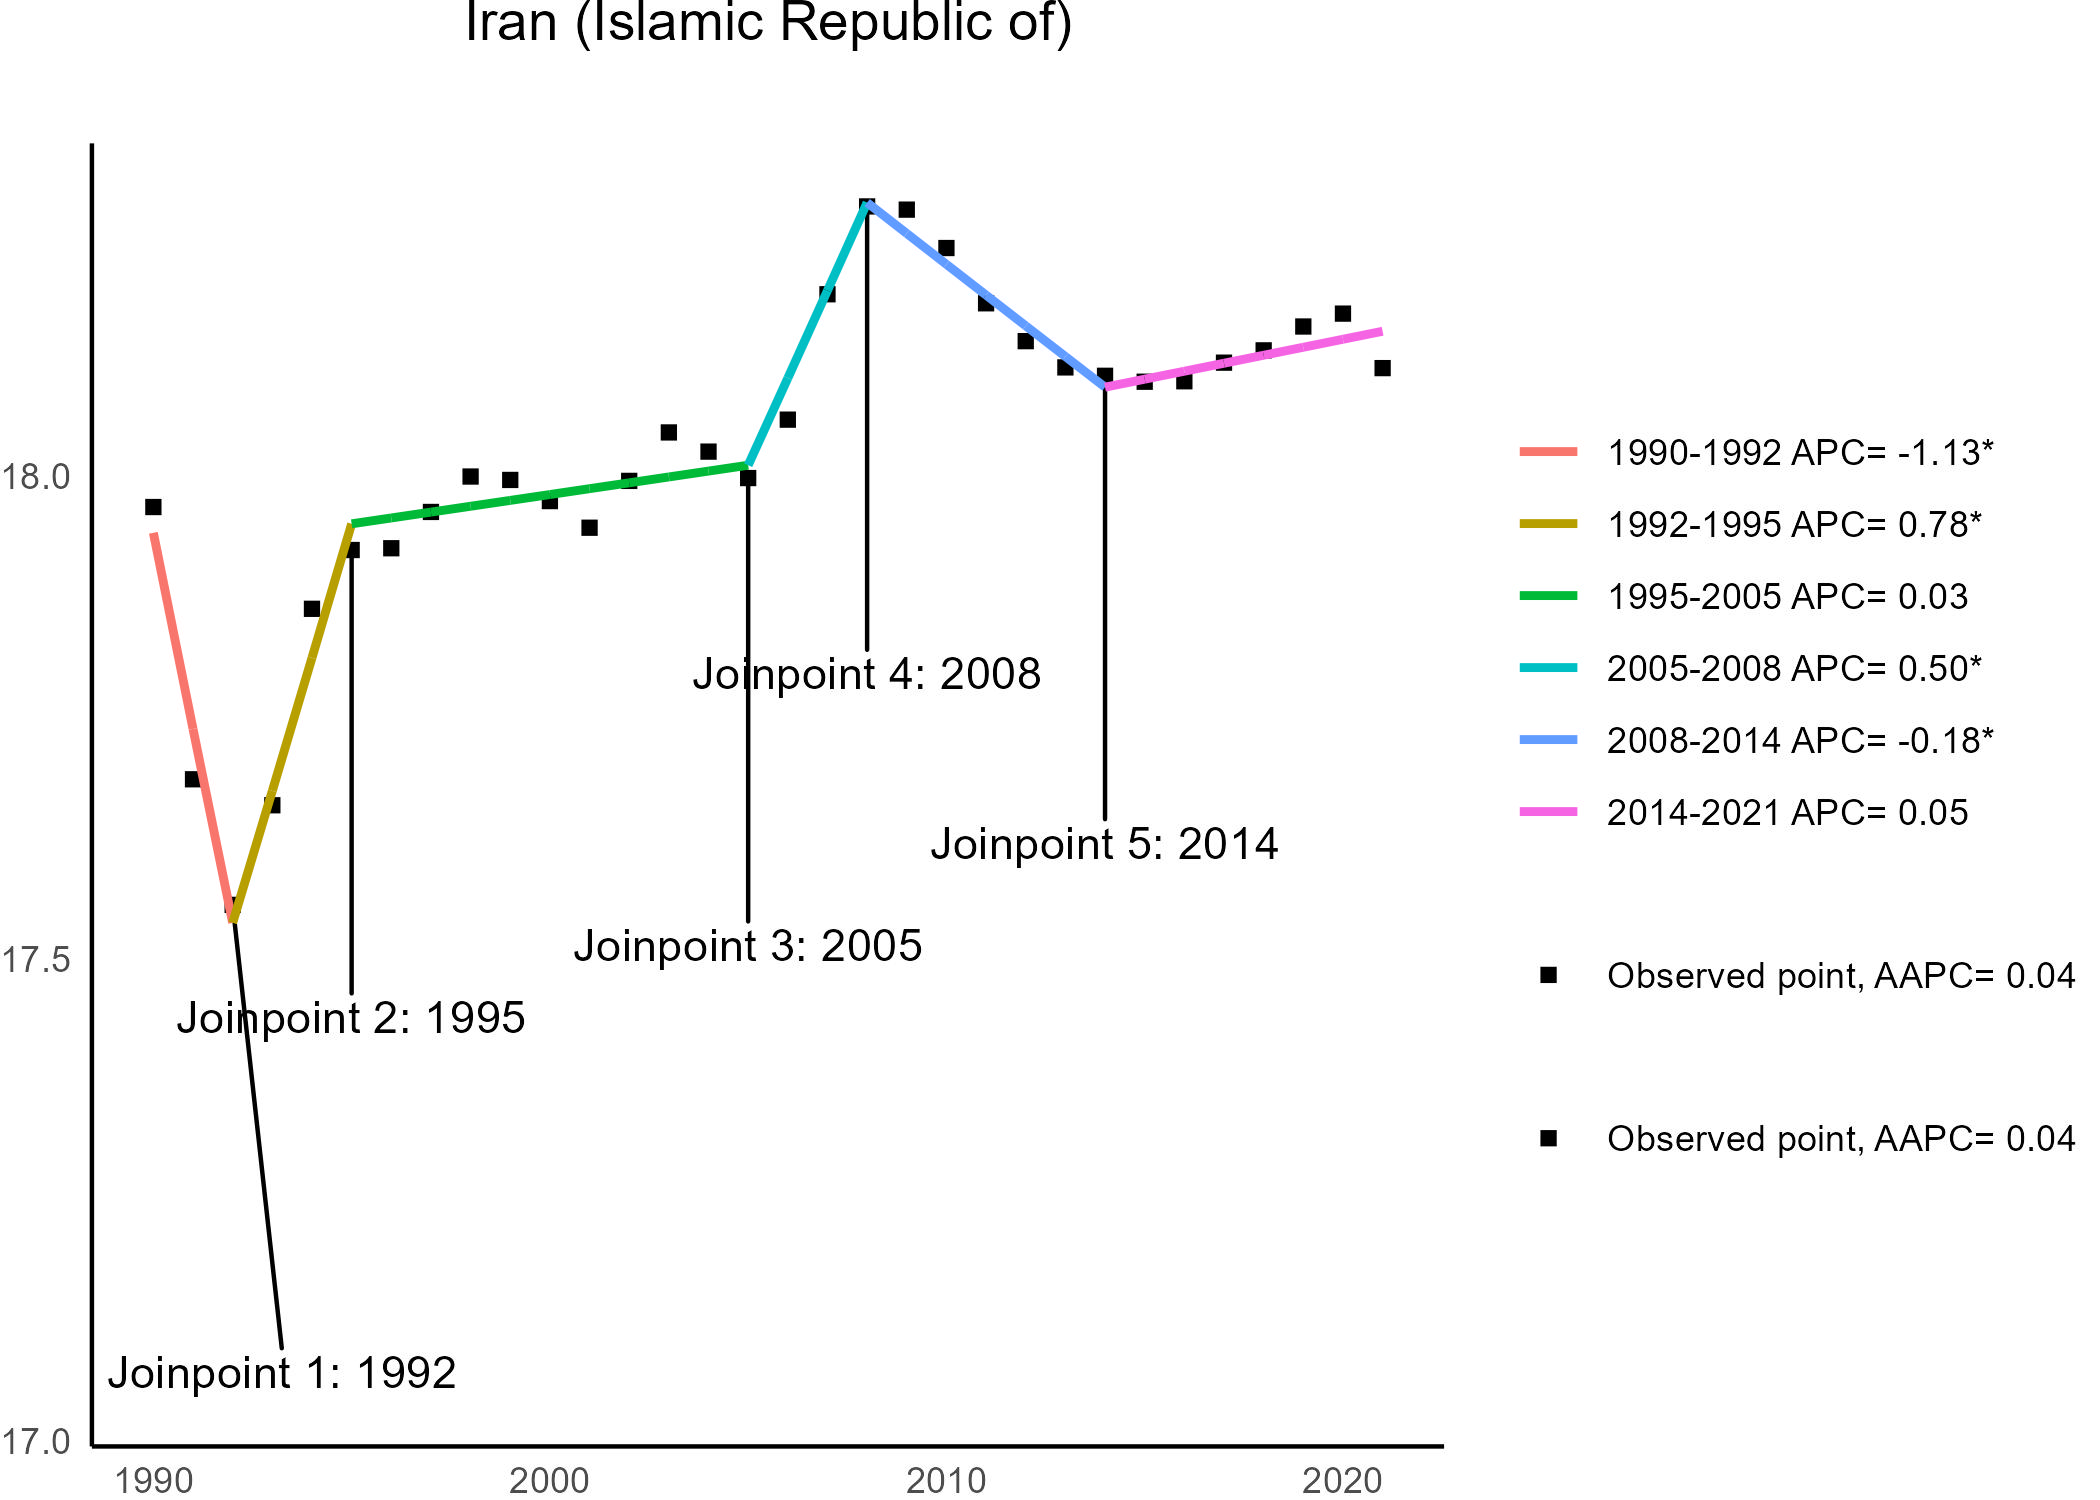

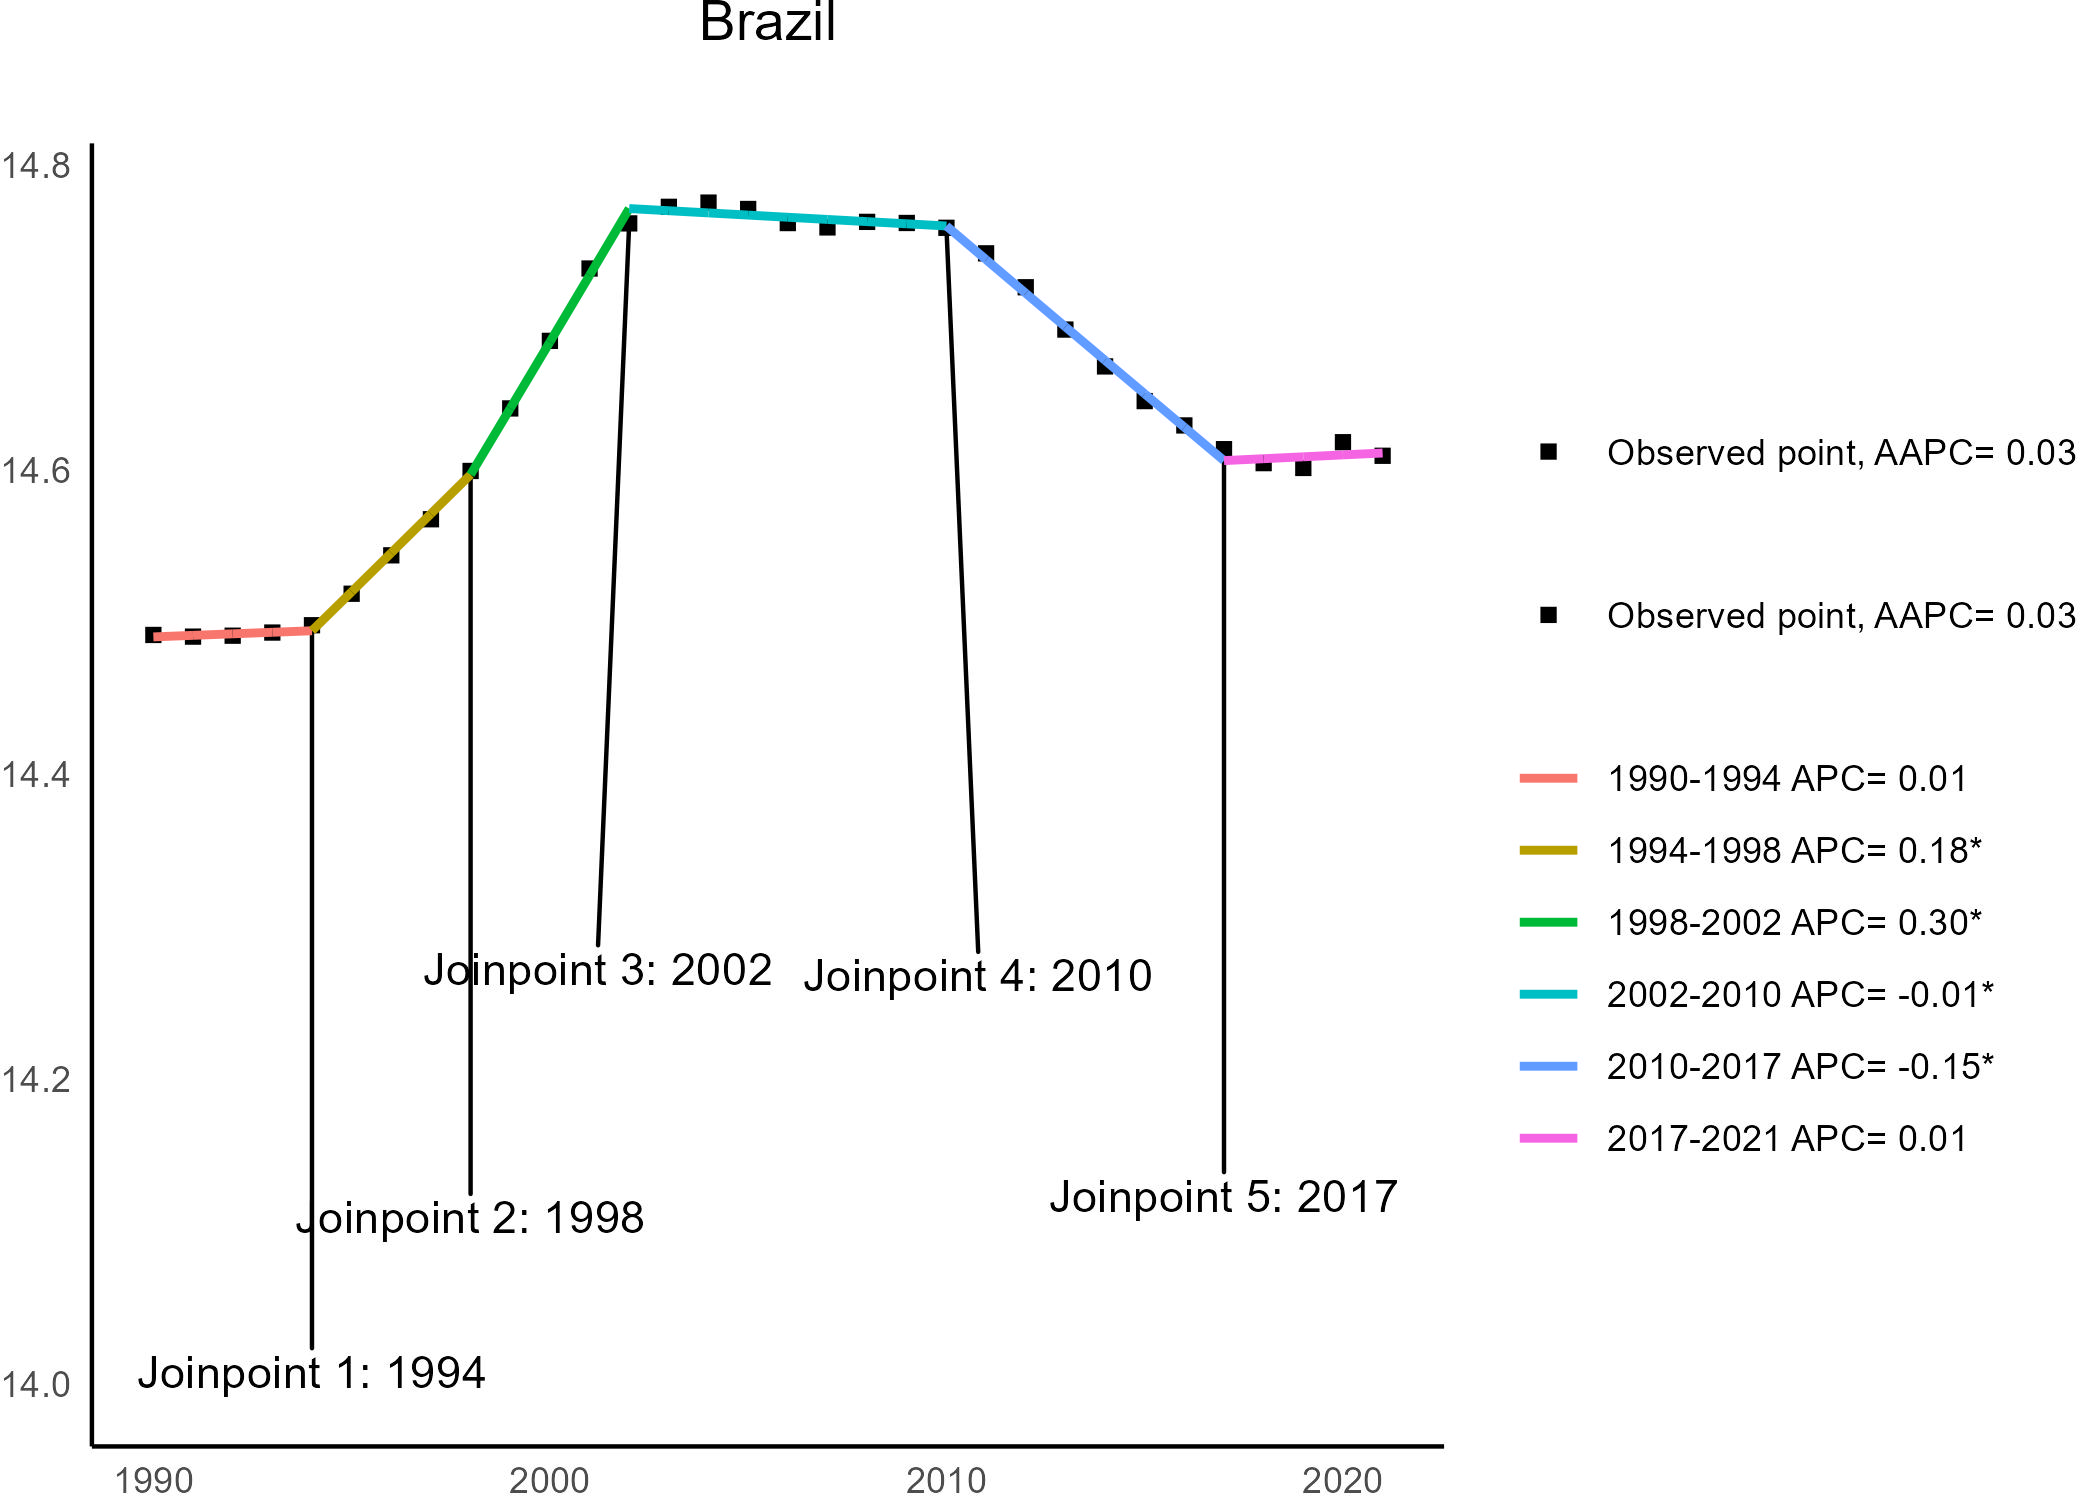

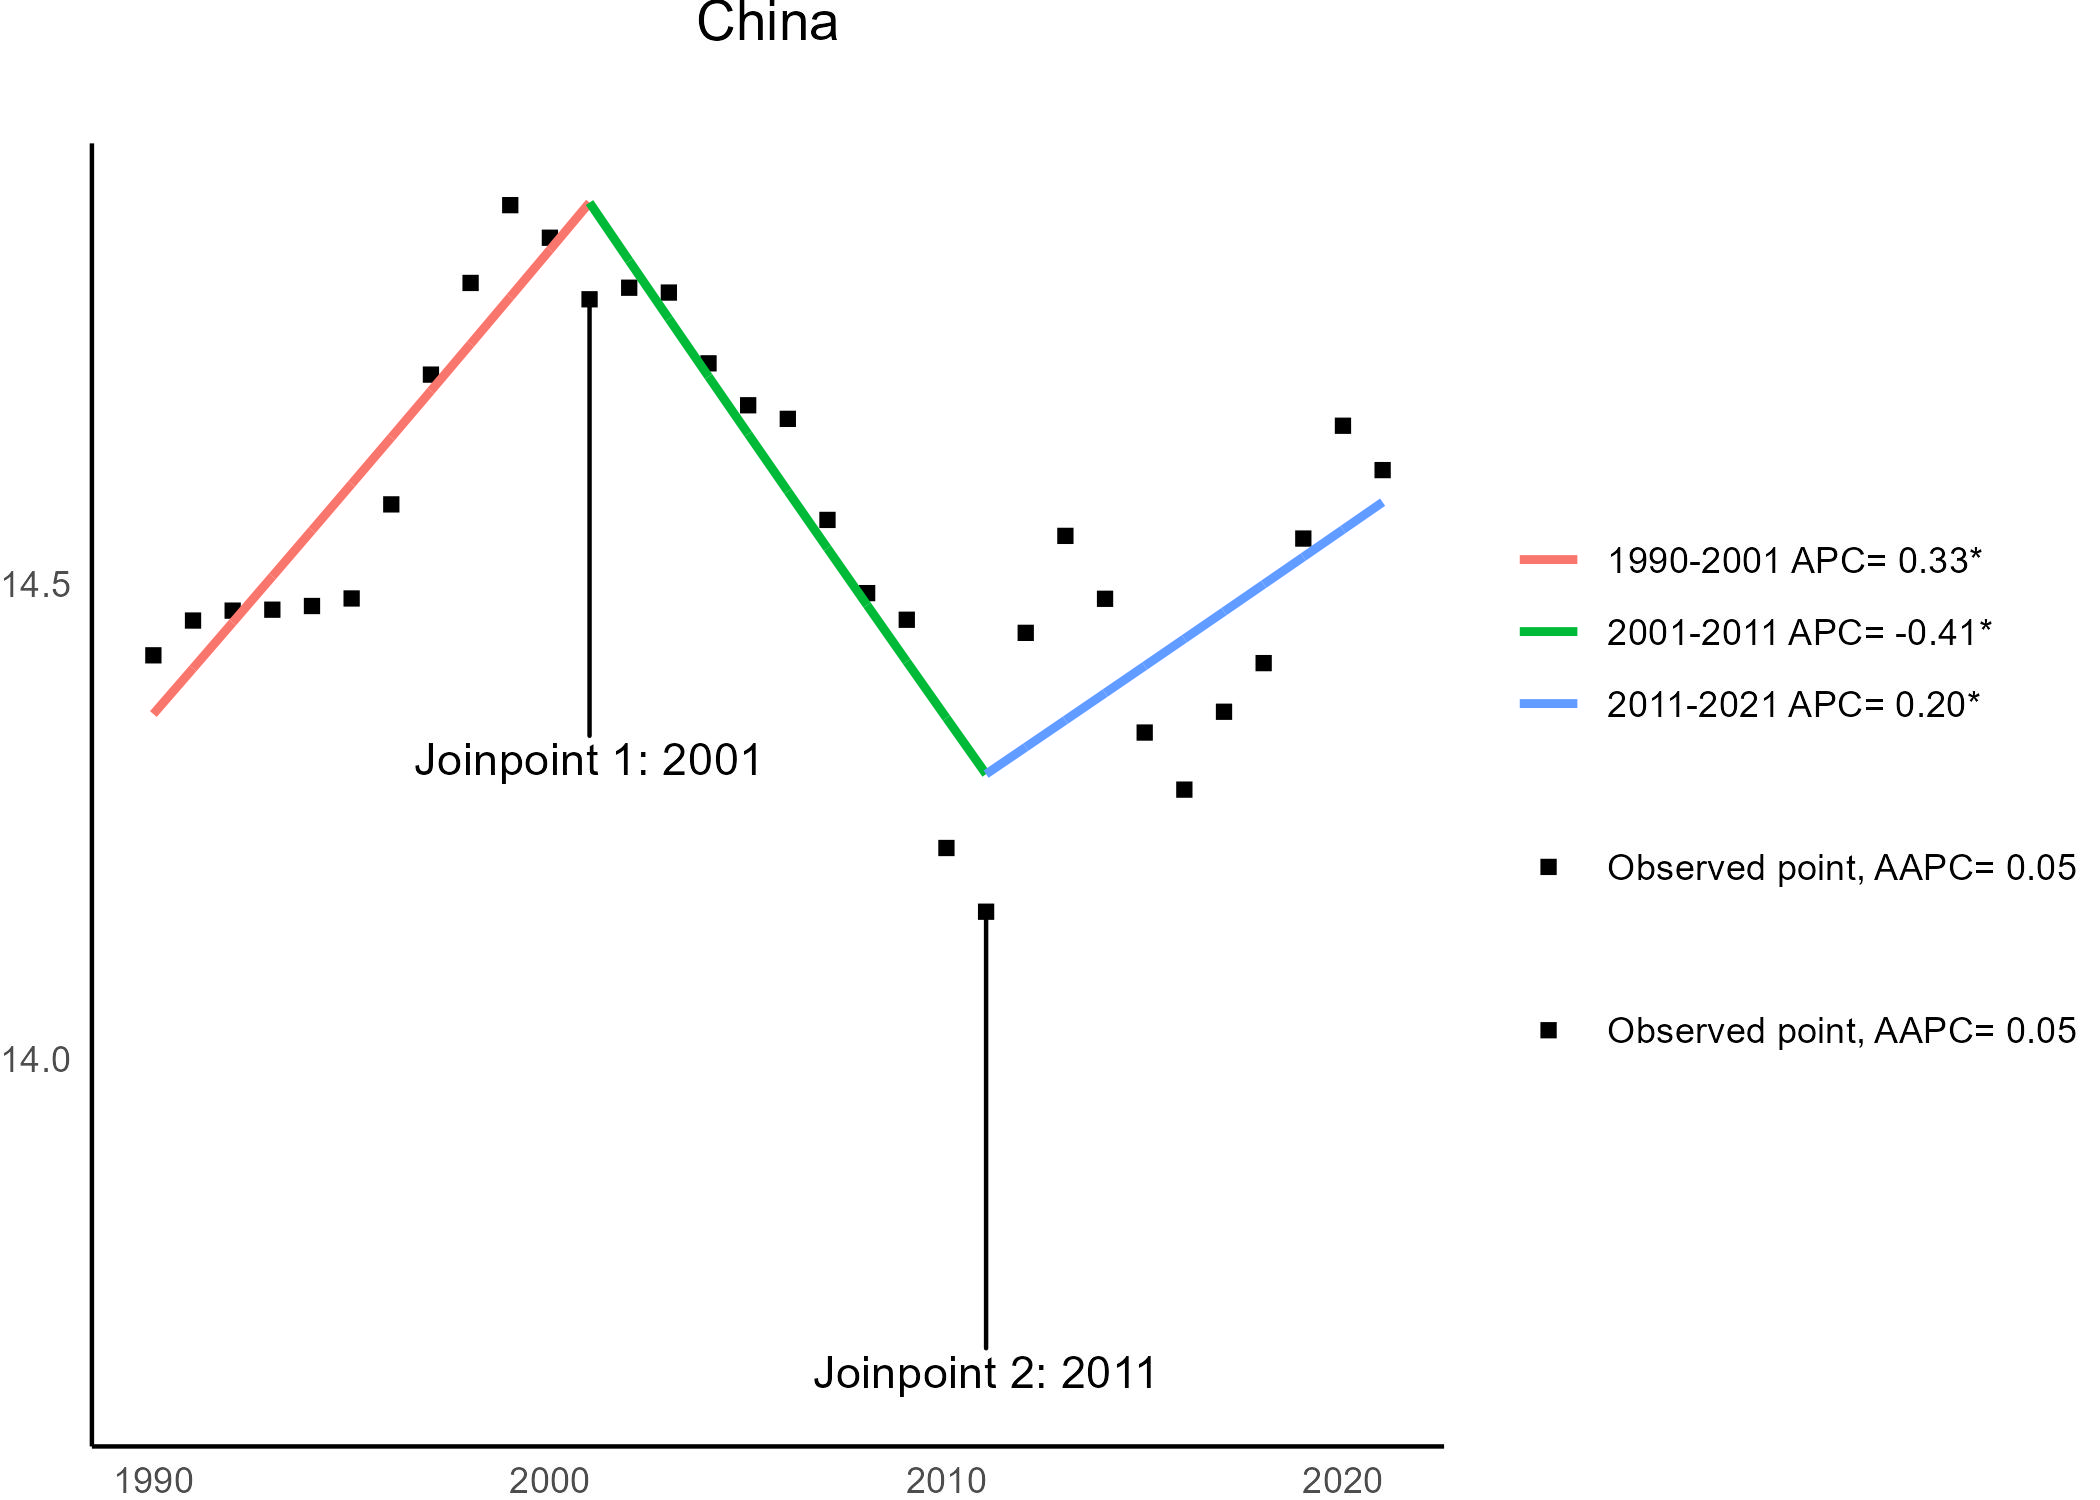

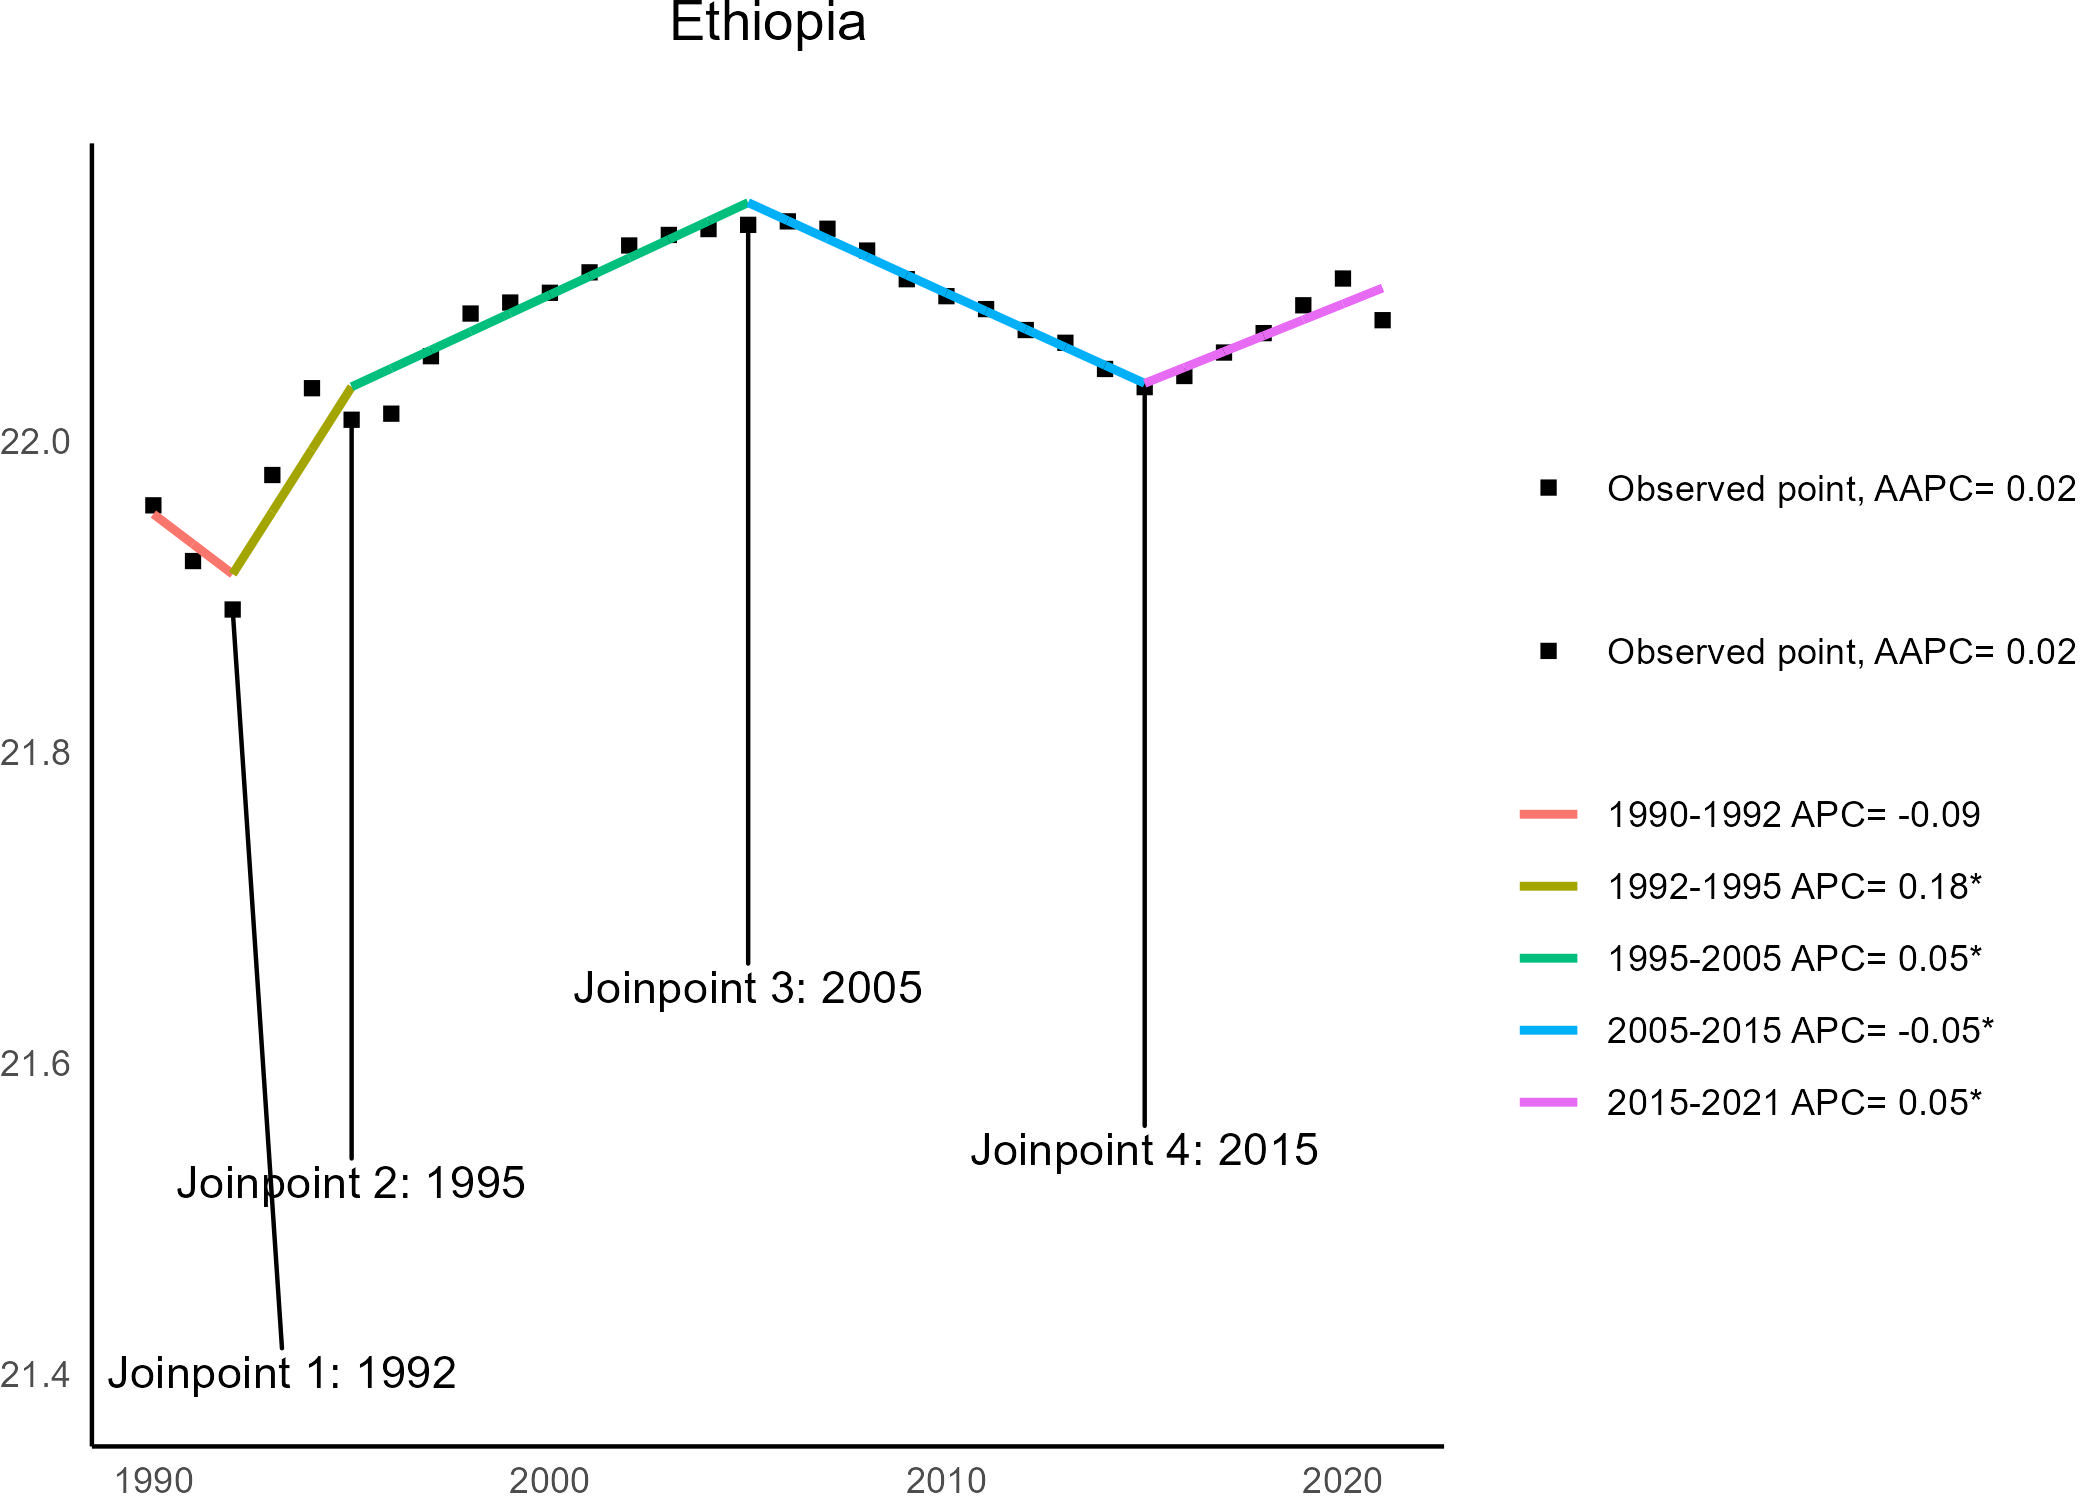

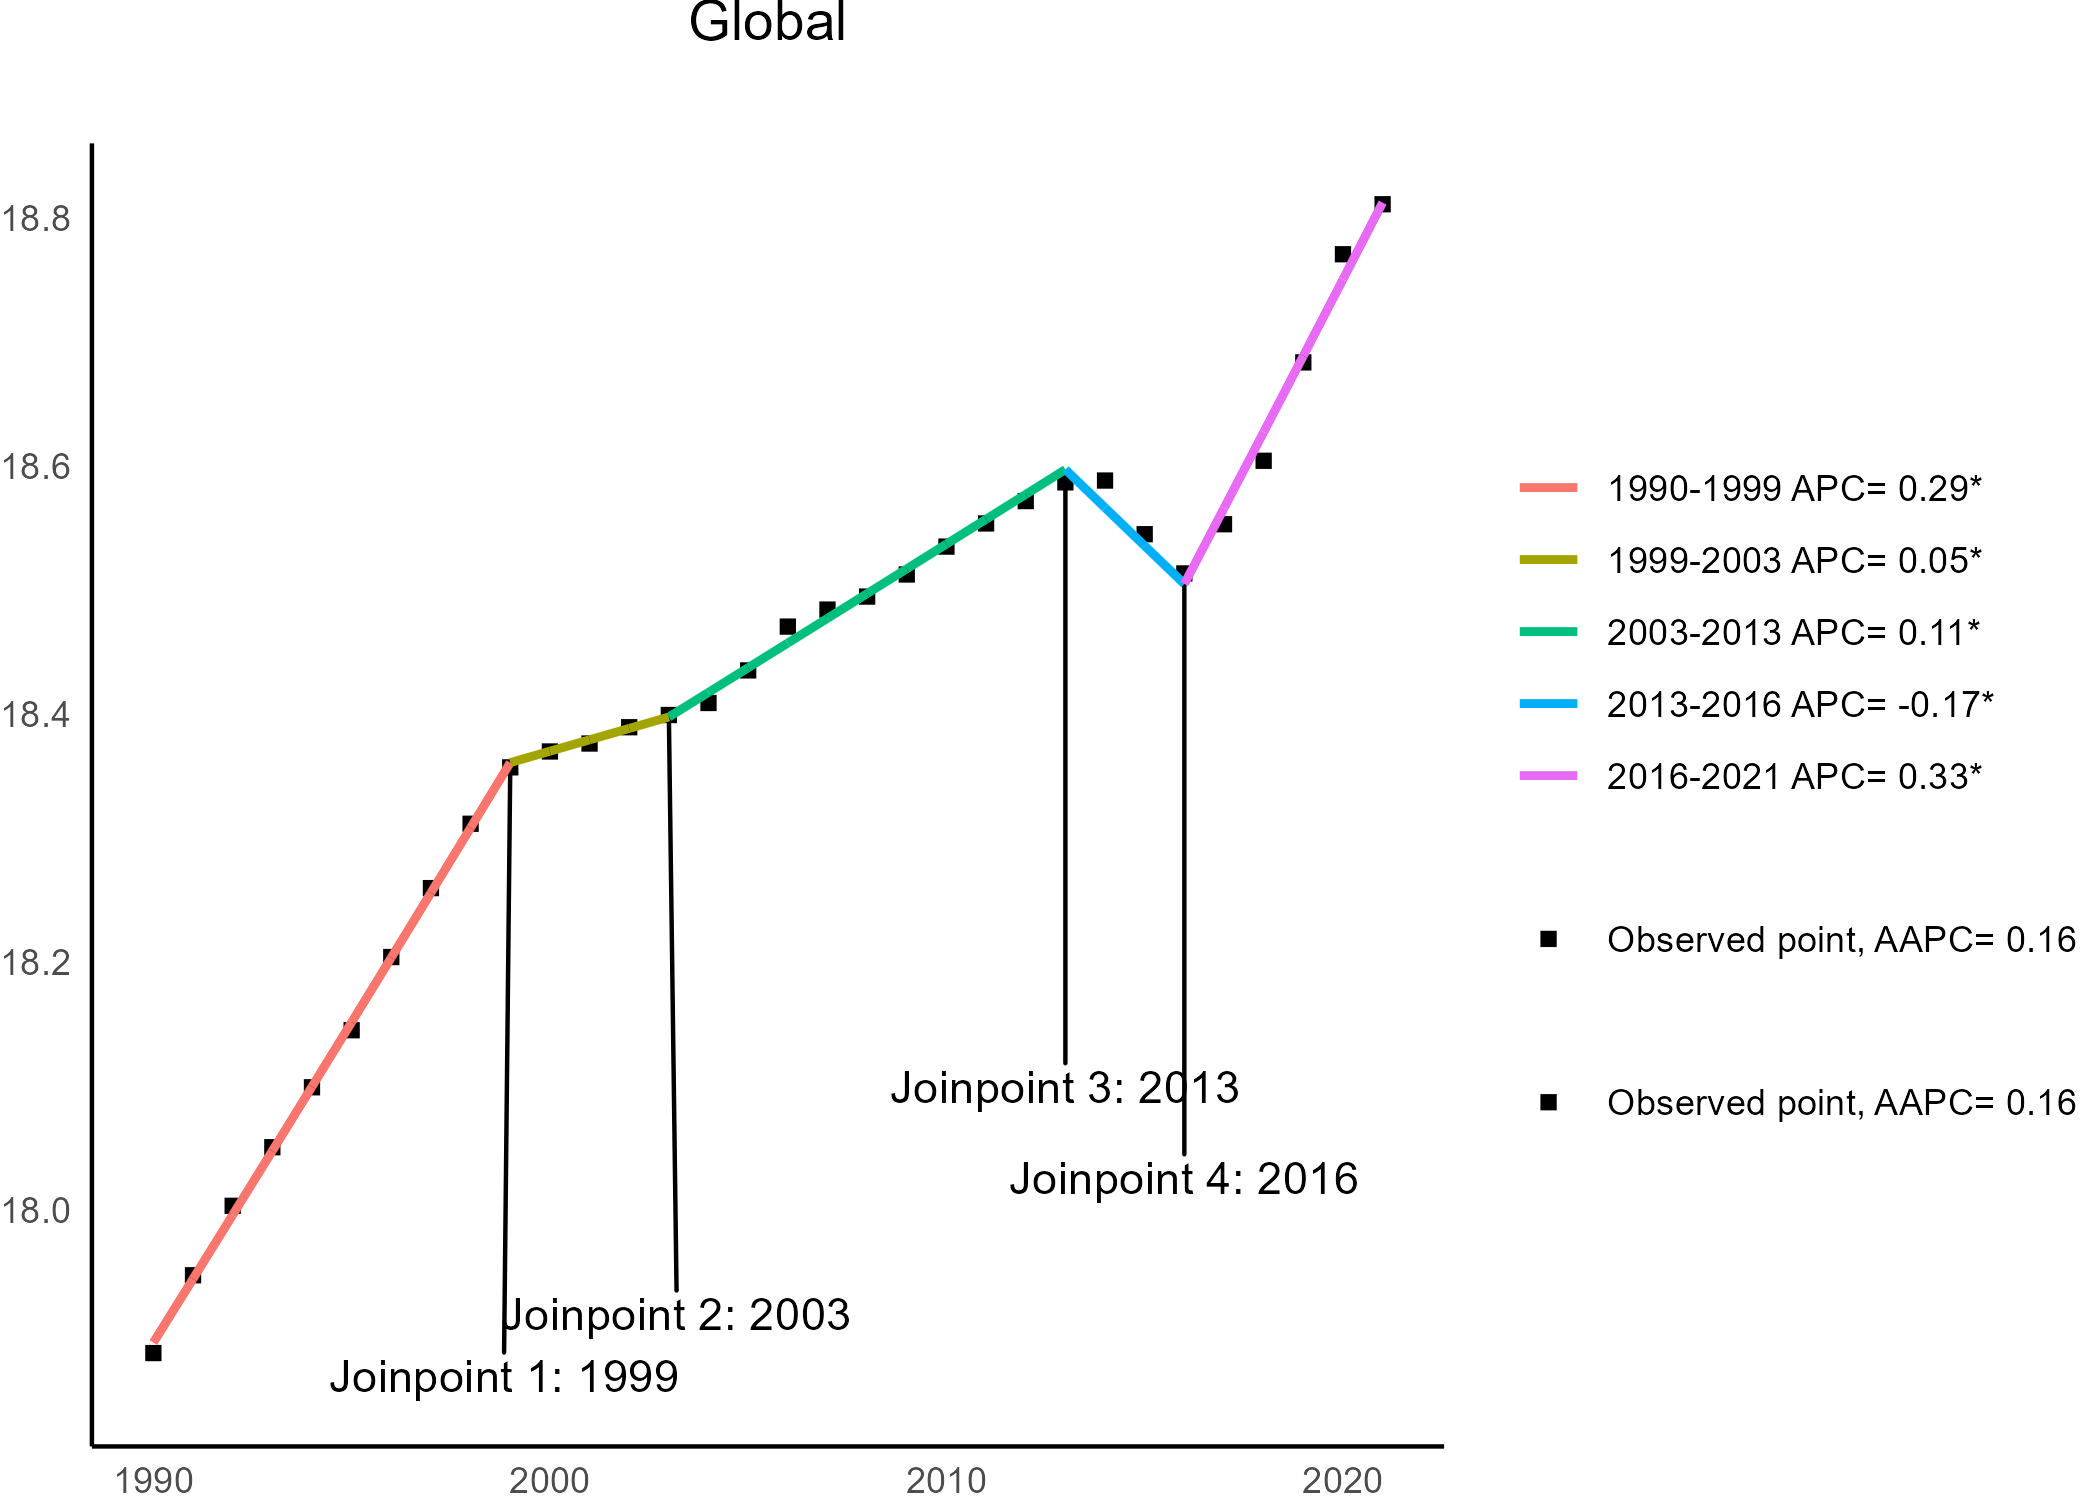

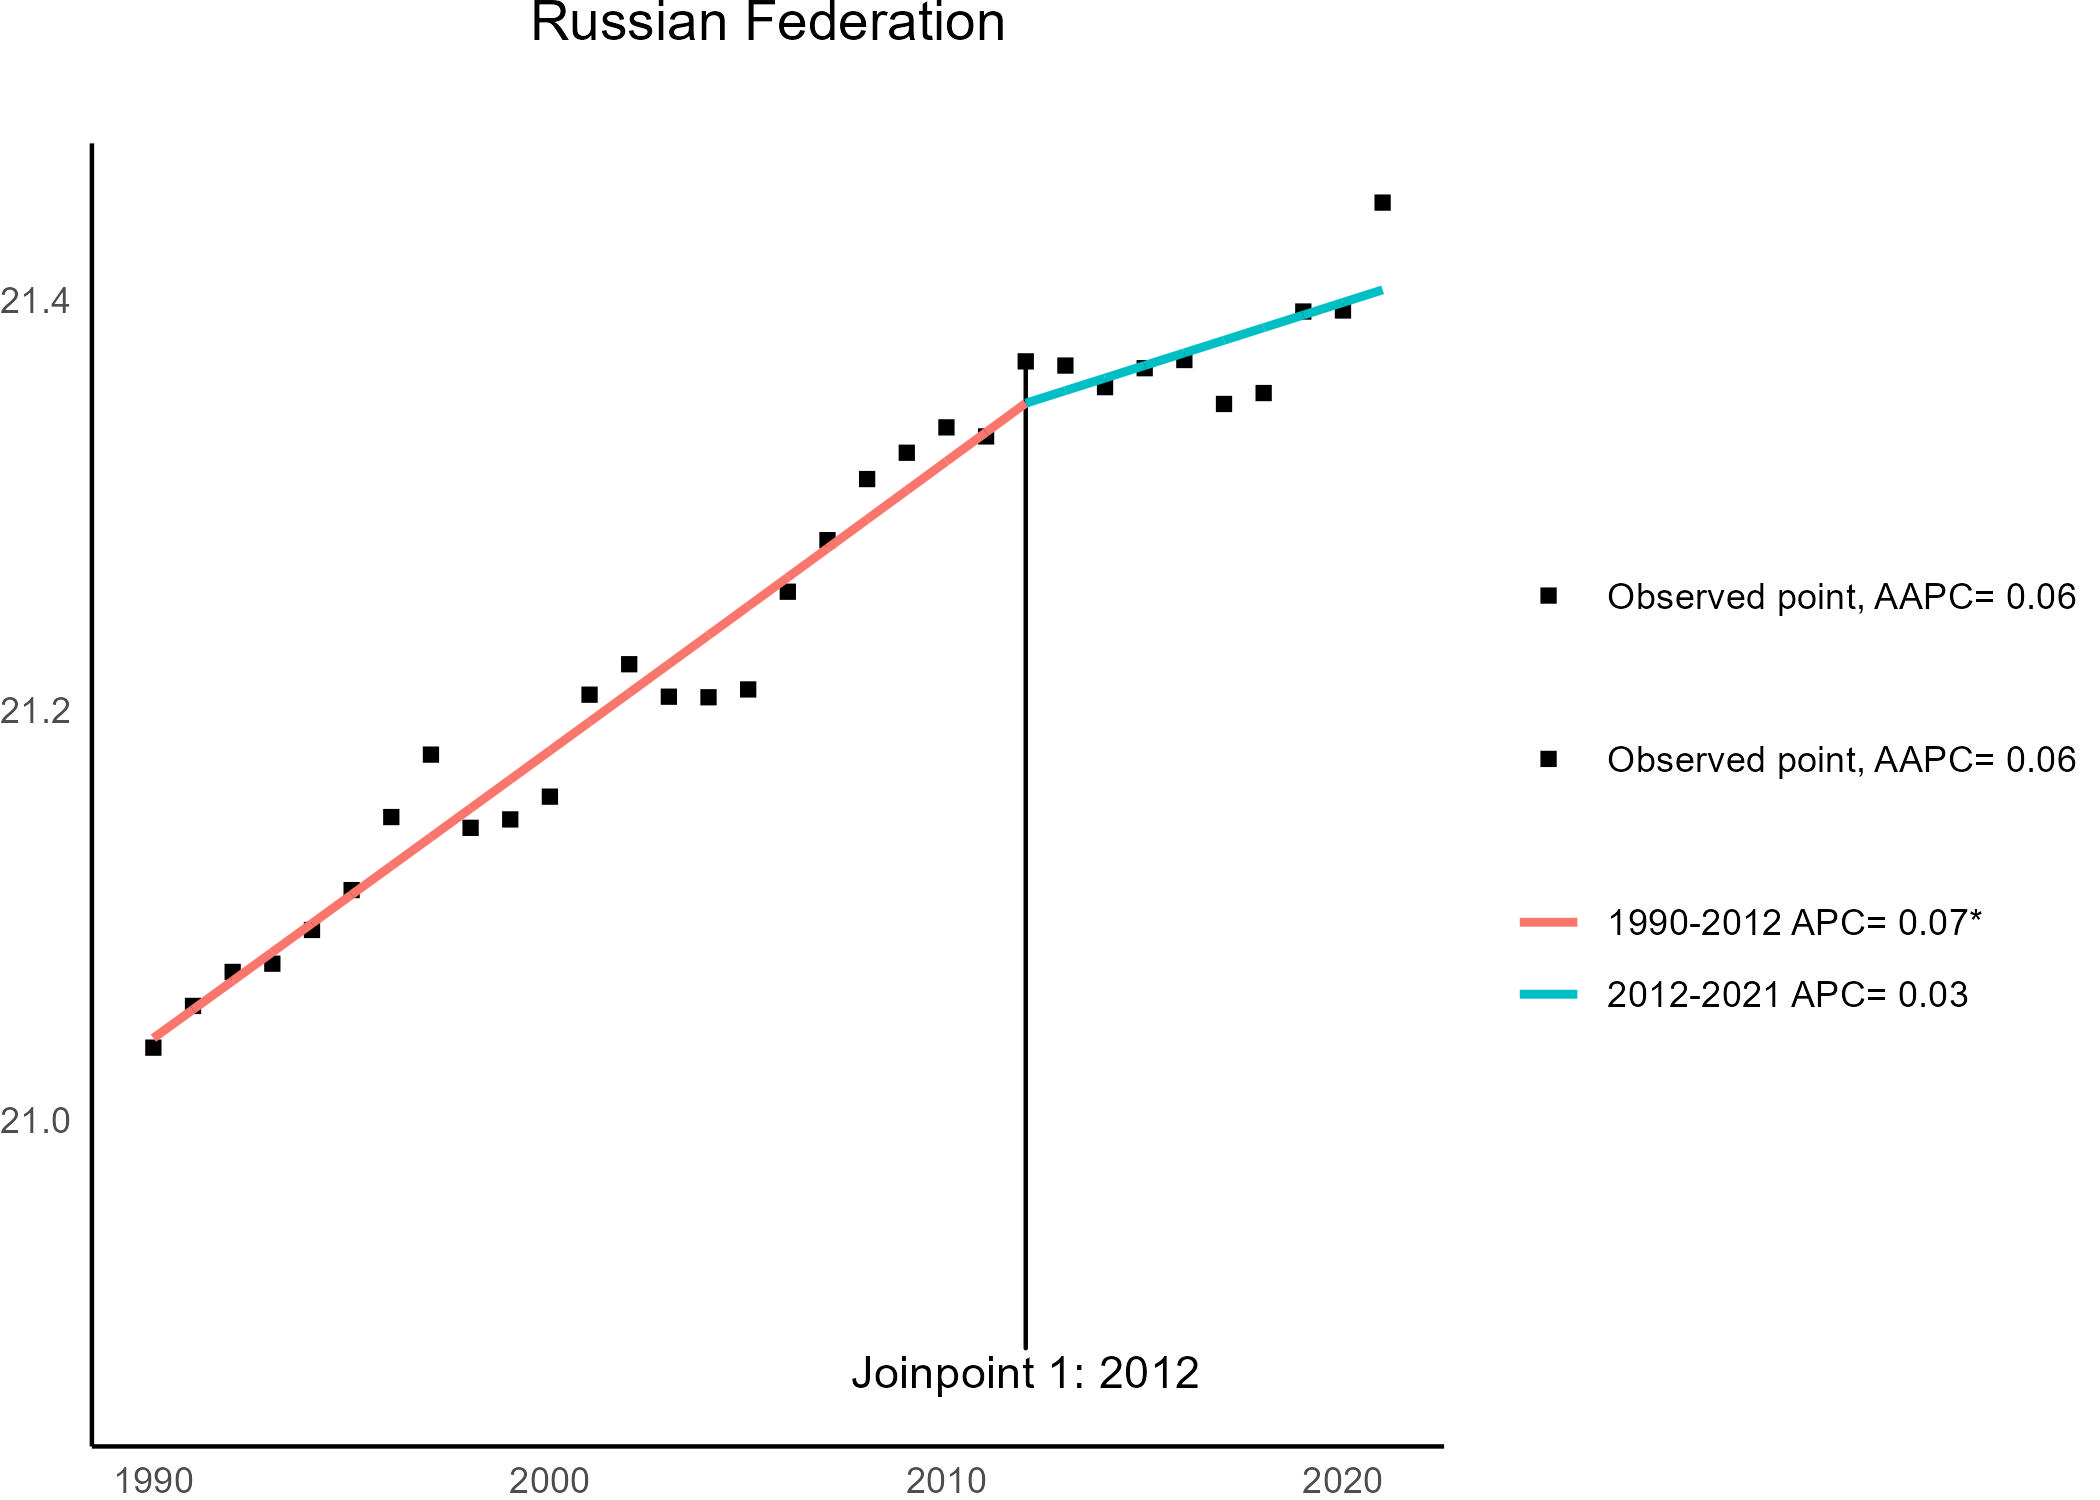

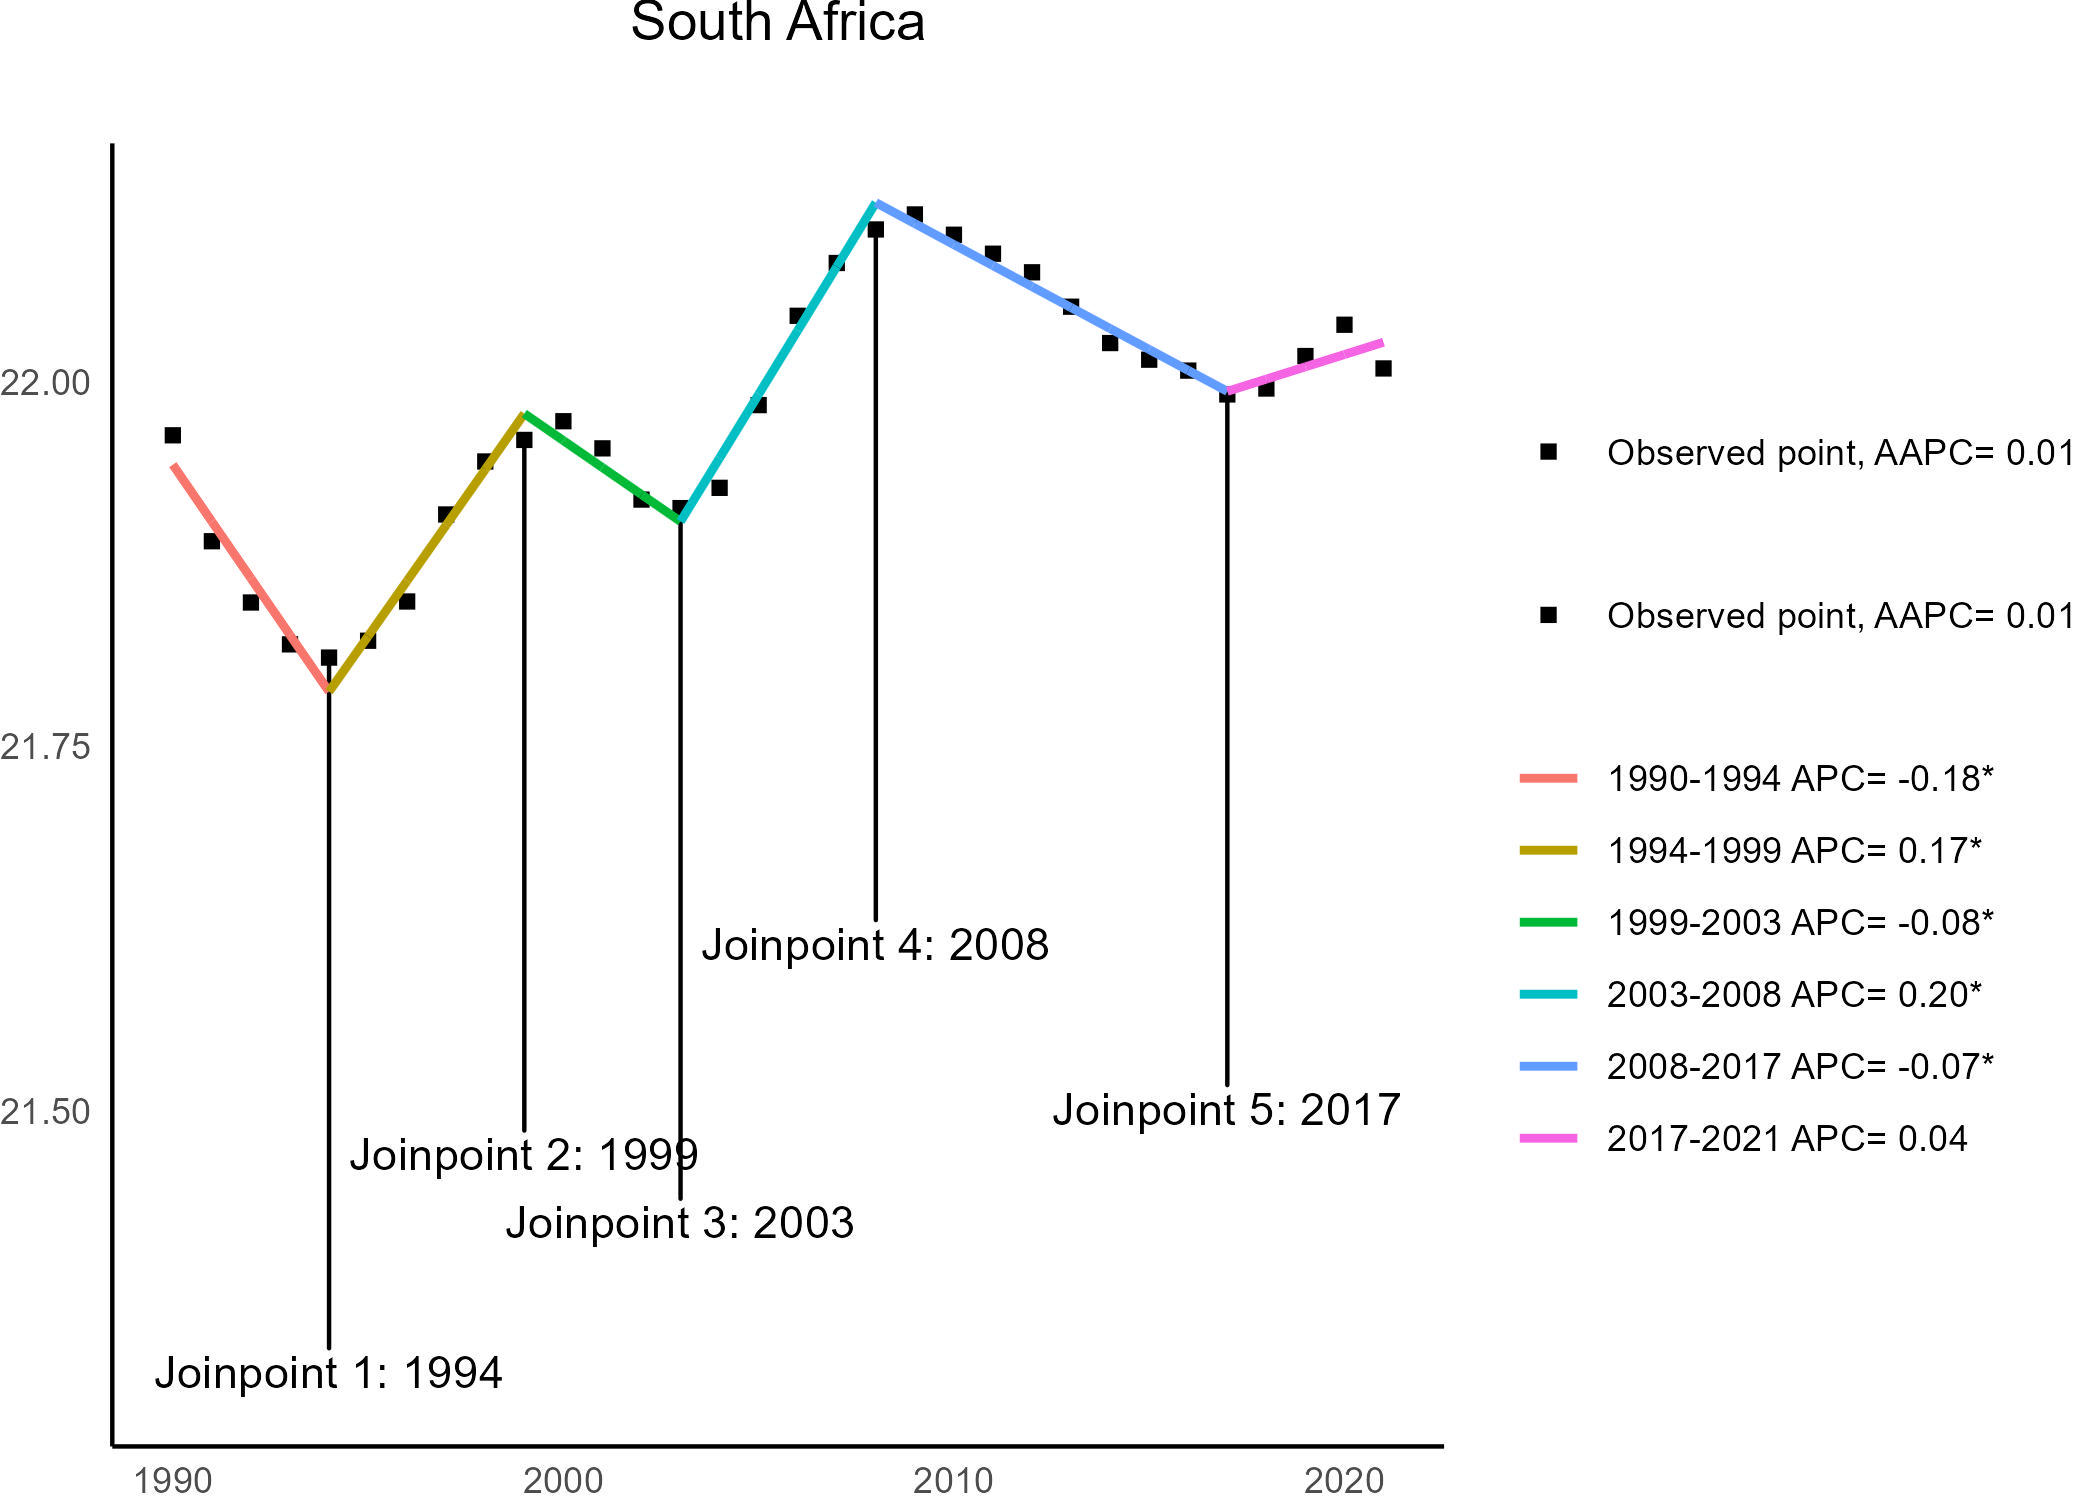

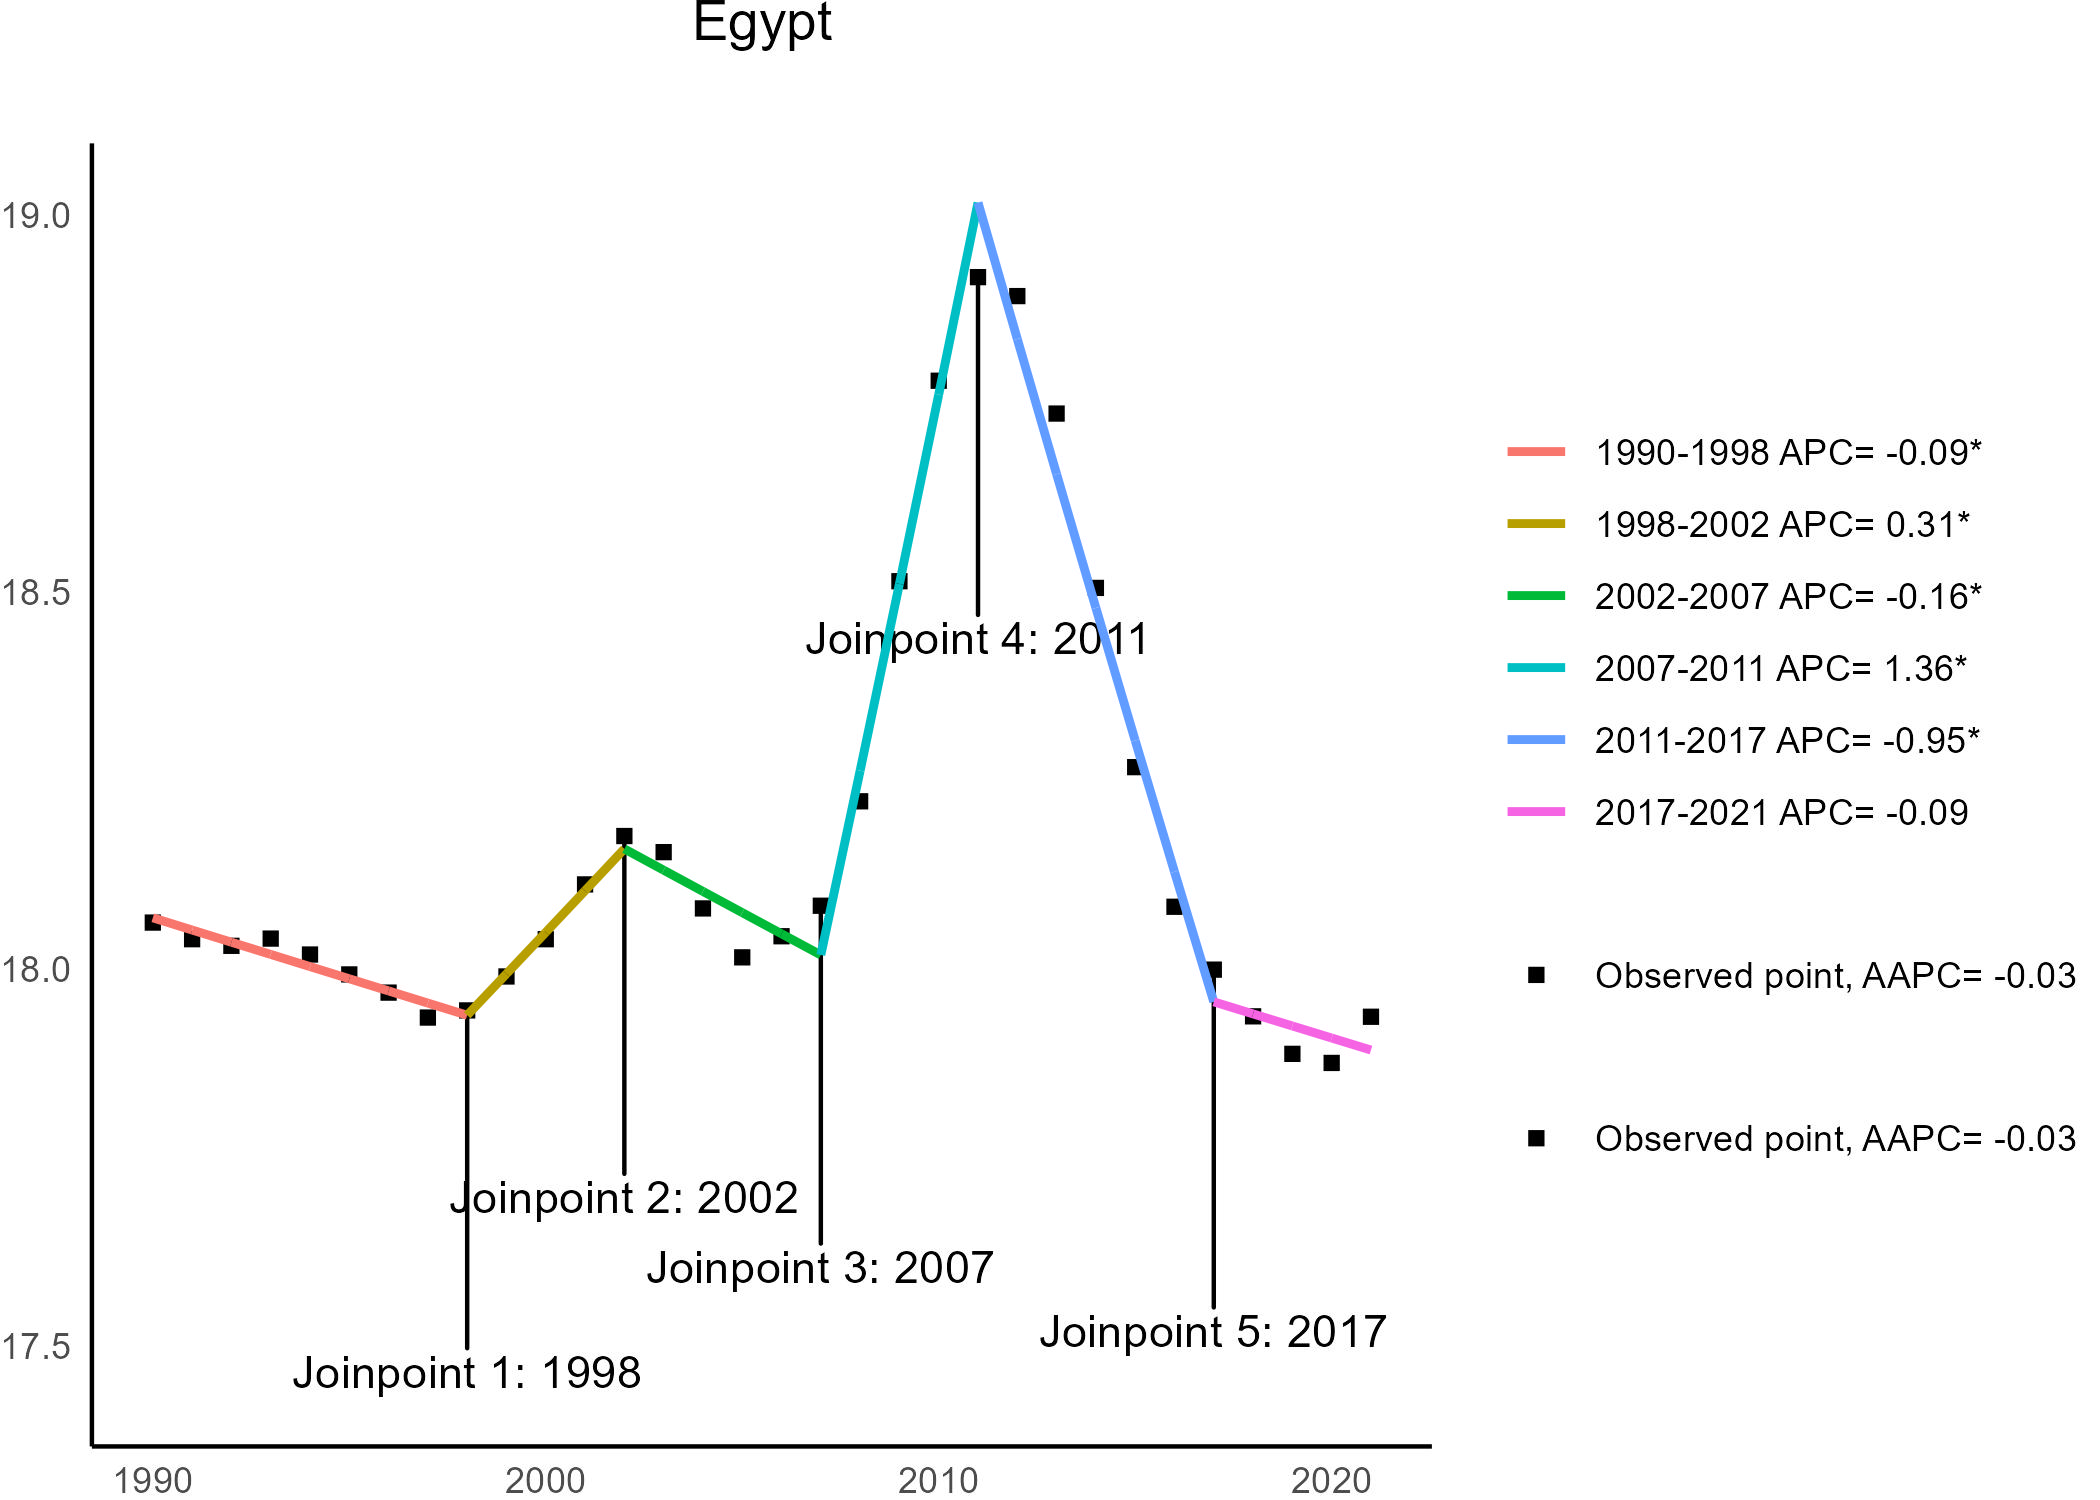

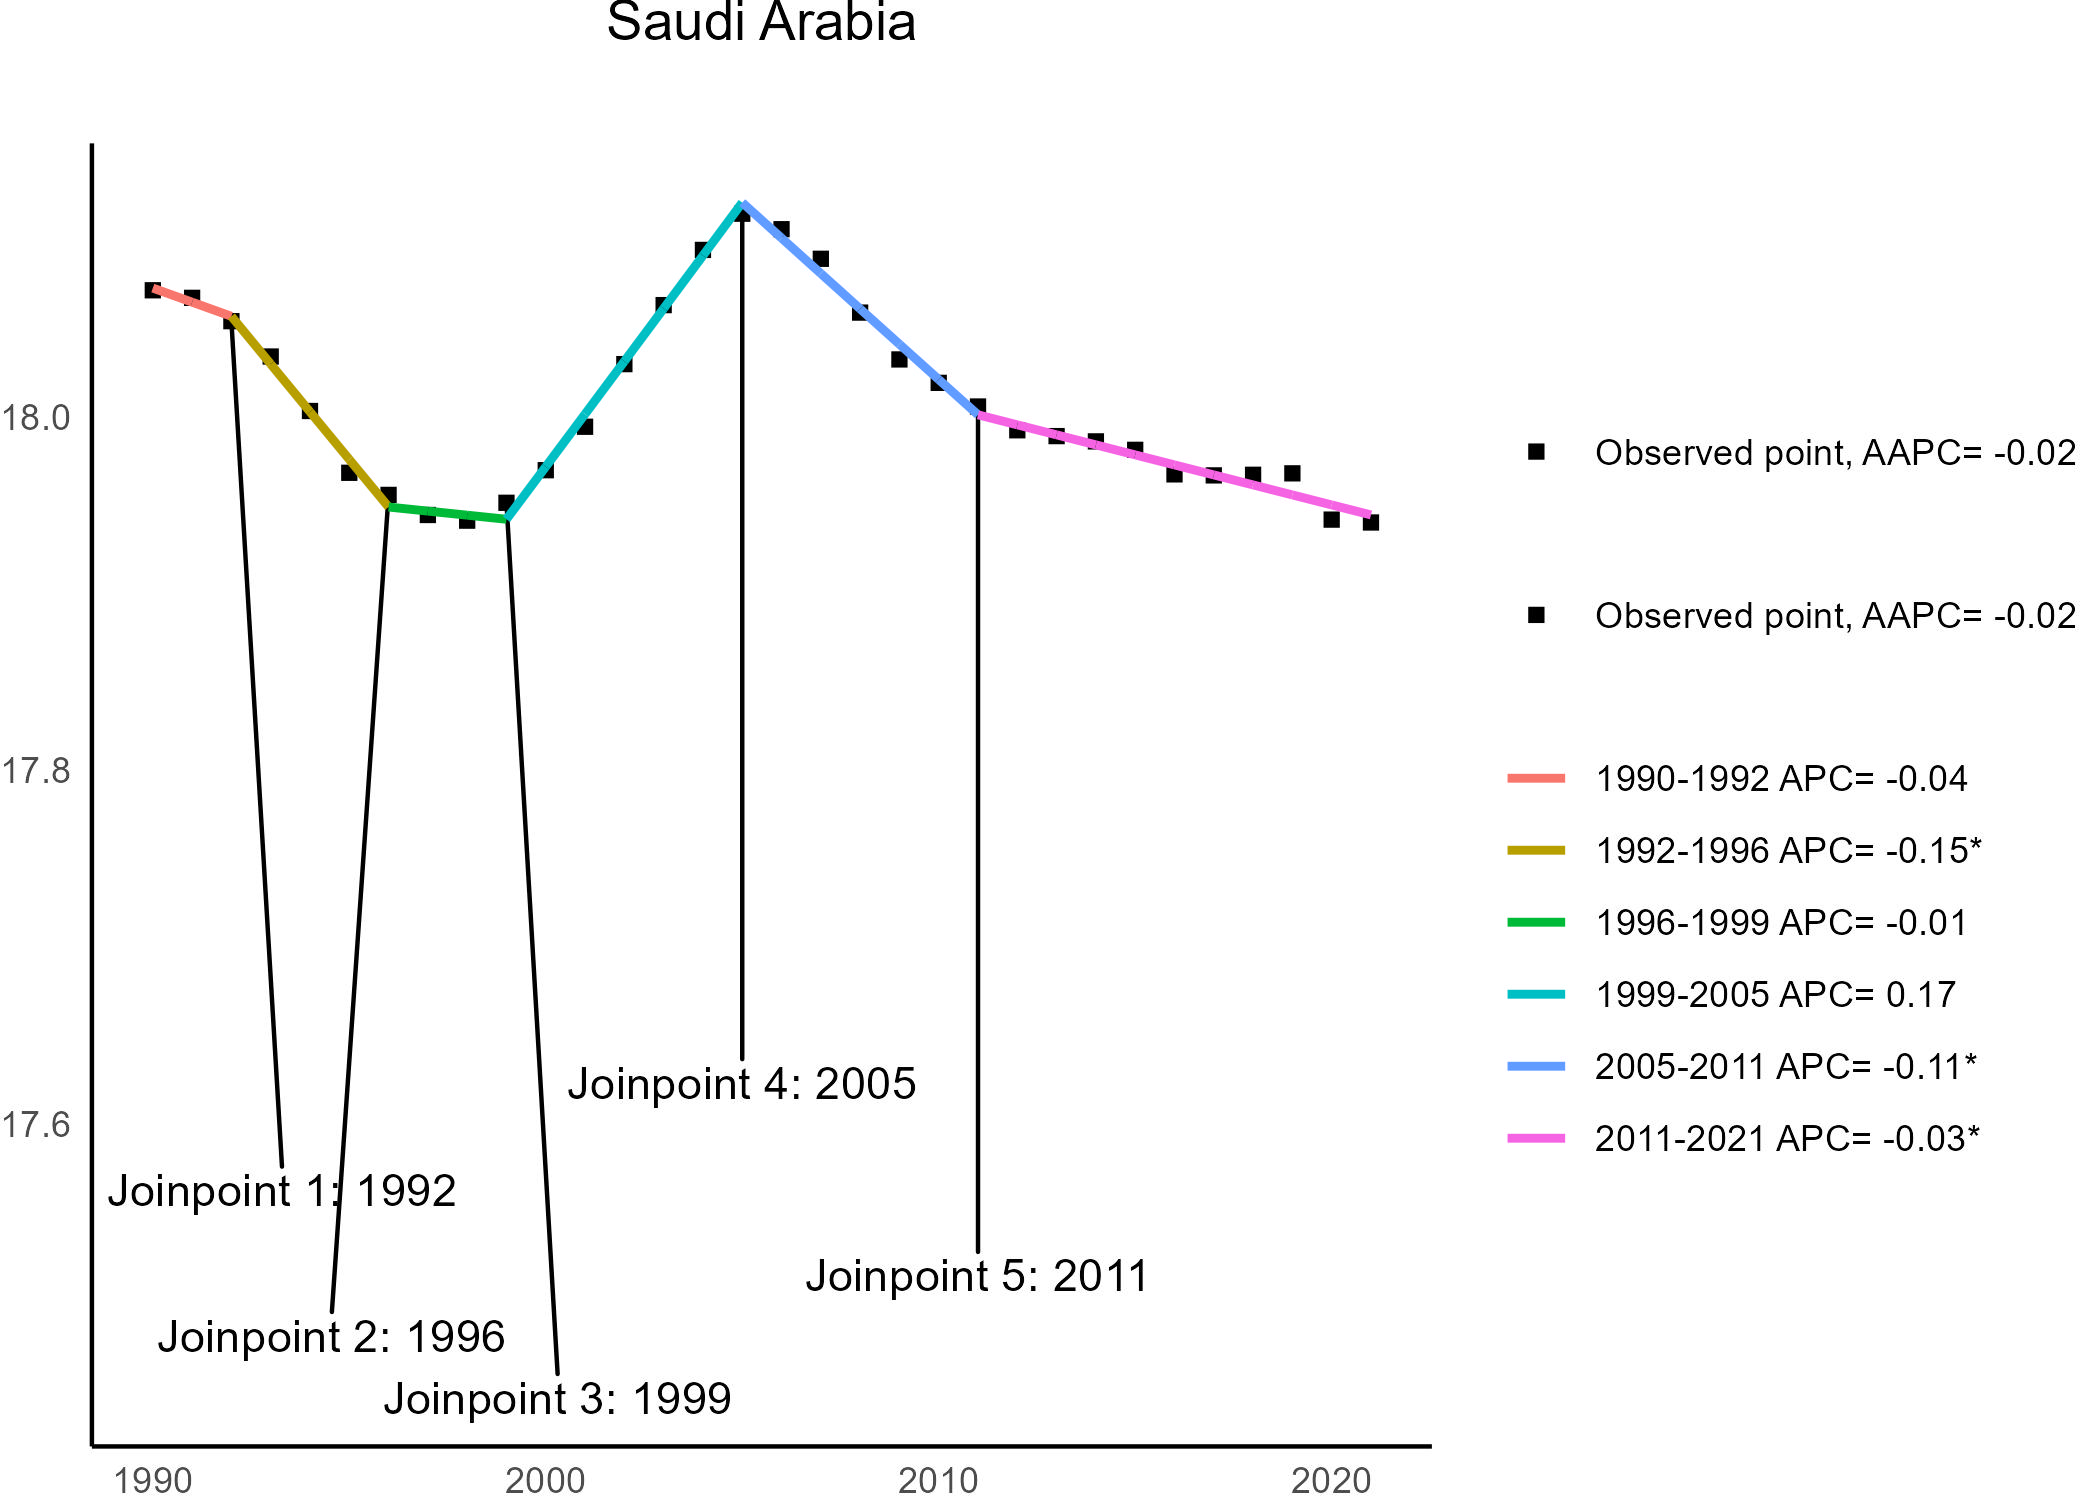

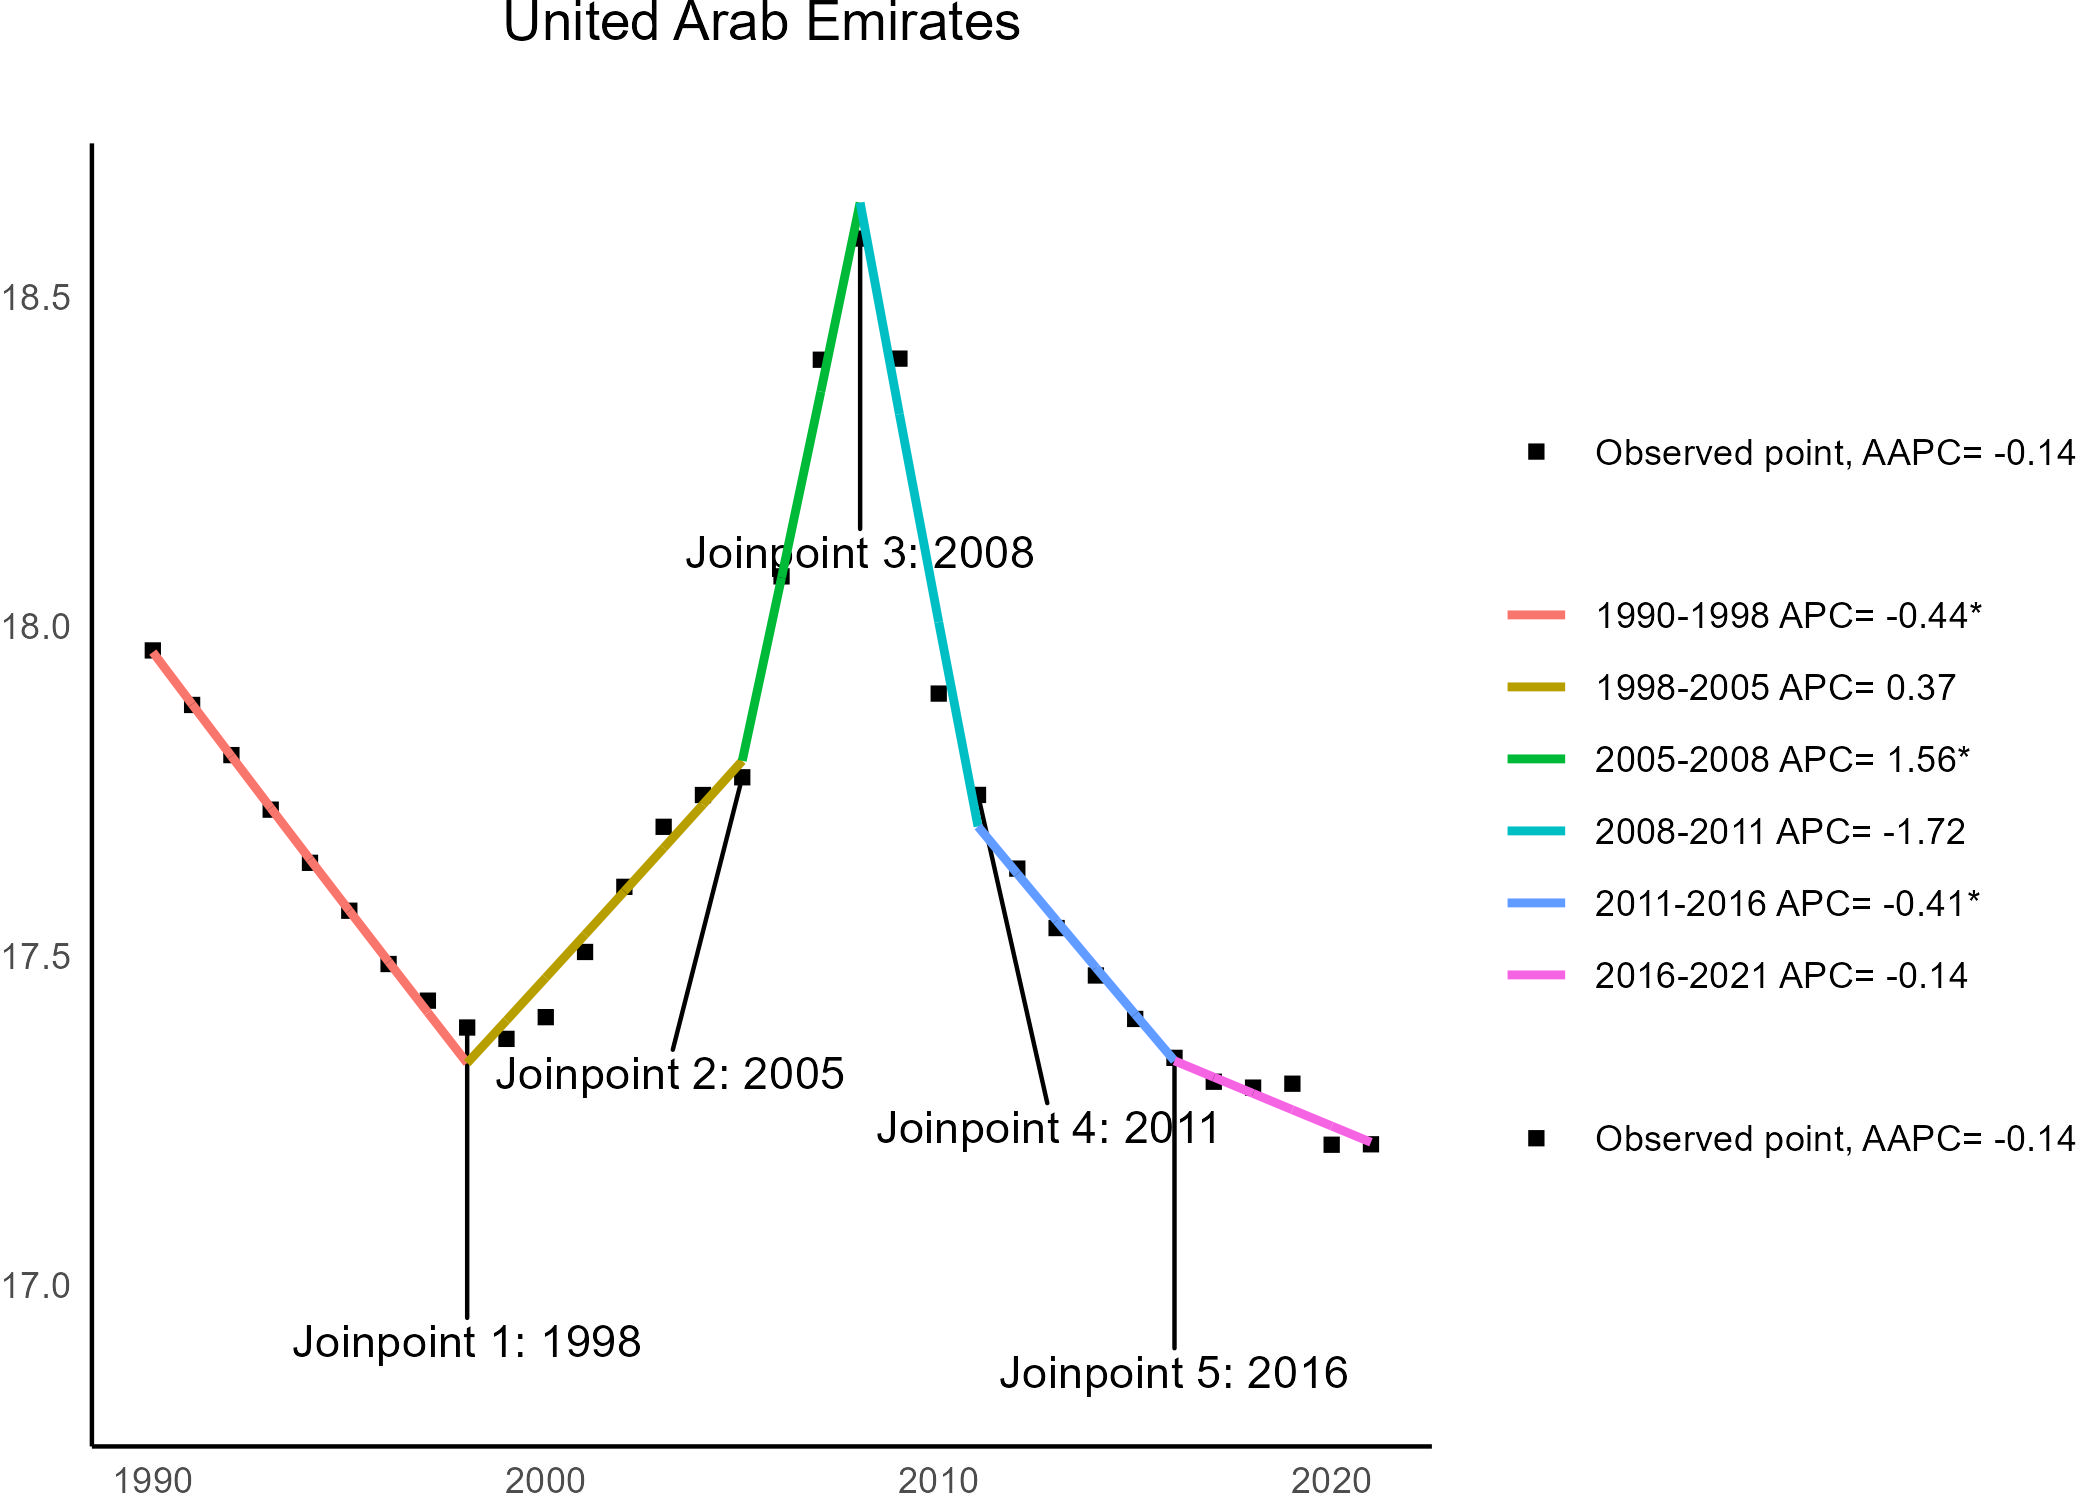

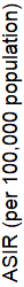

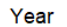


Supplemental Figure_2. Incidence trends of Autism-Spectrum Disorder from 1990 to 2021. Incidence trends over time, showing variation across BRICS nations with AAPC values for each country.

ASIR: Age-standardized incidence rate, AAPC: Average Annual Percentage Change, APC: Annual Percentage Change.


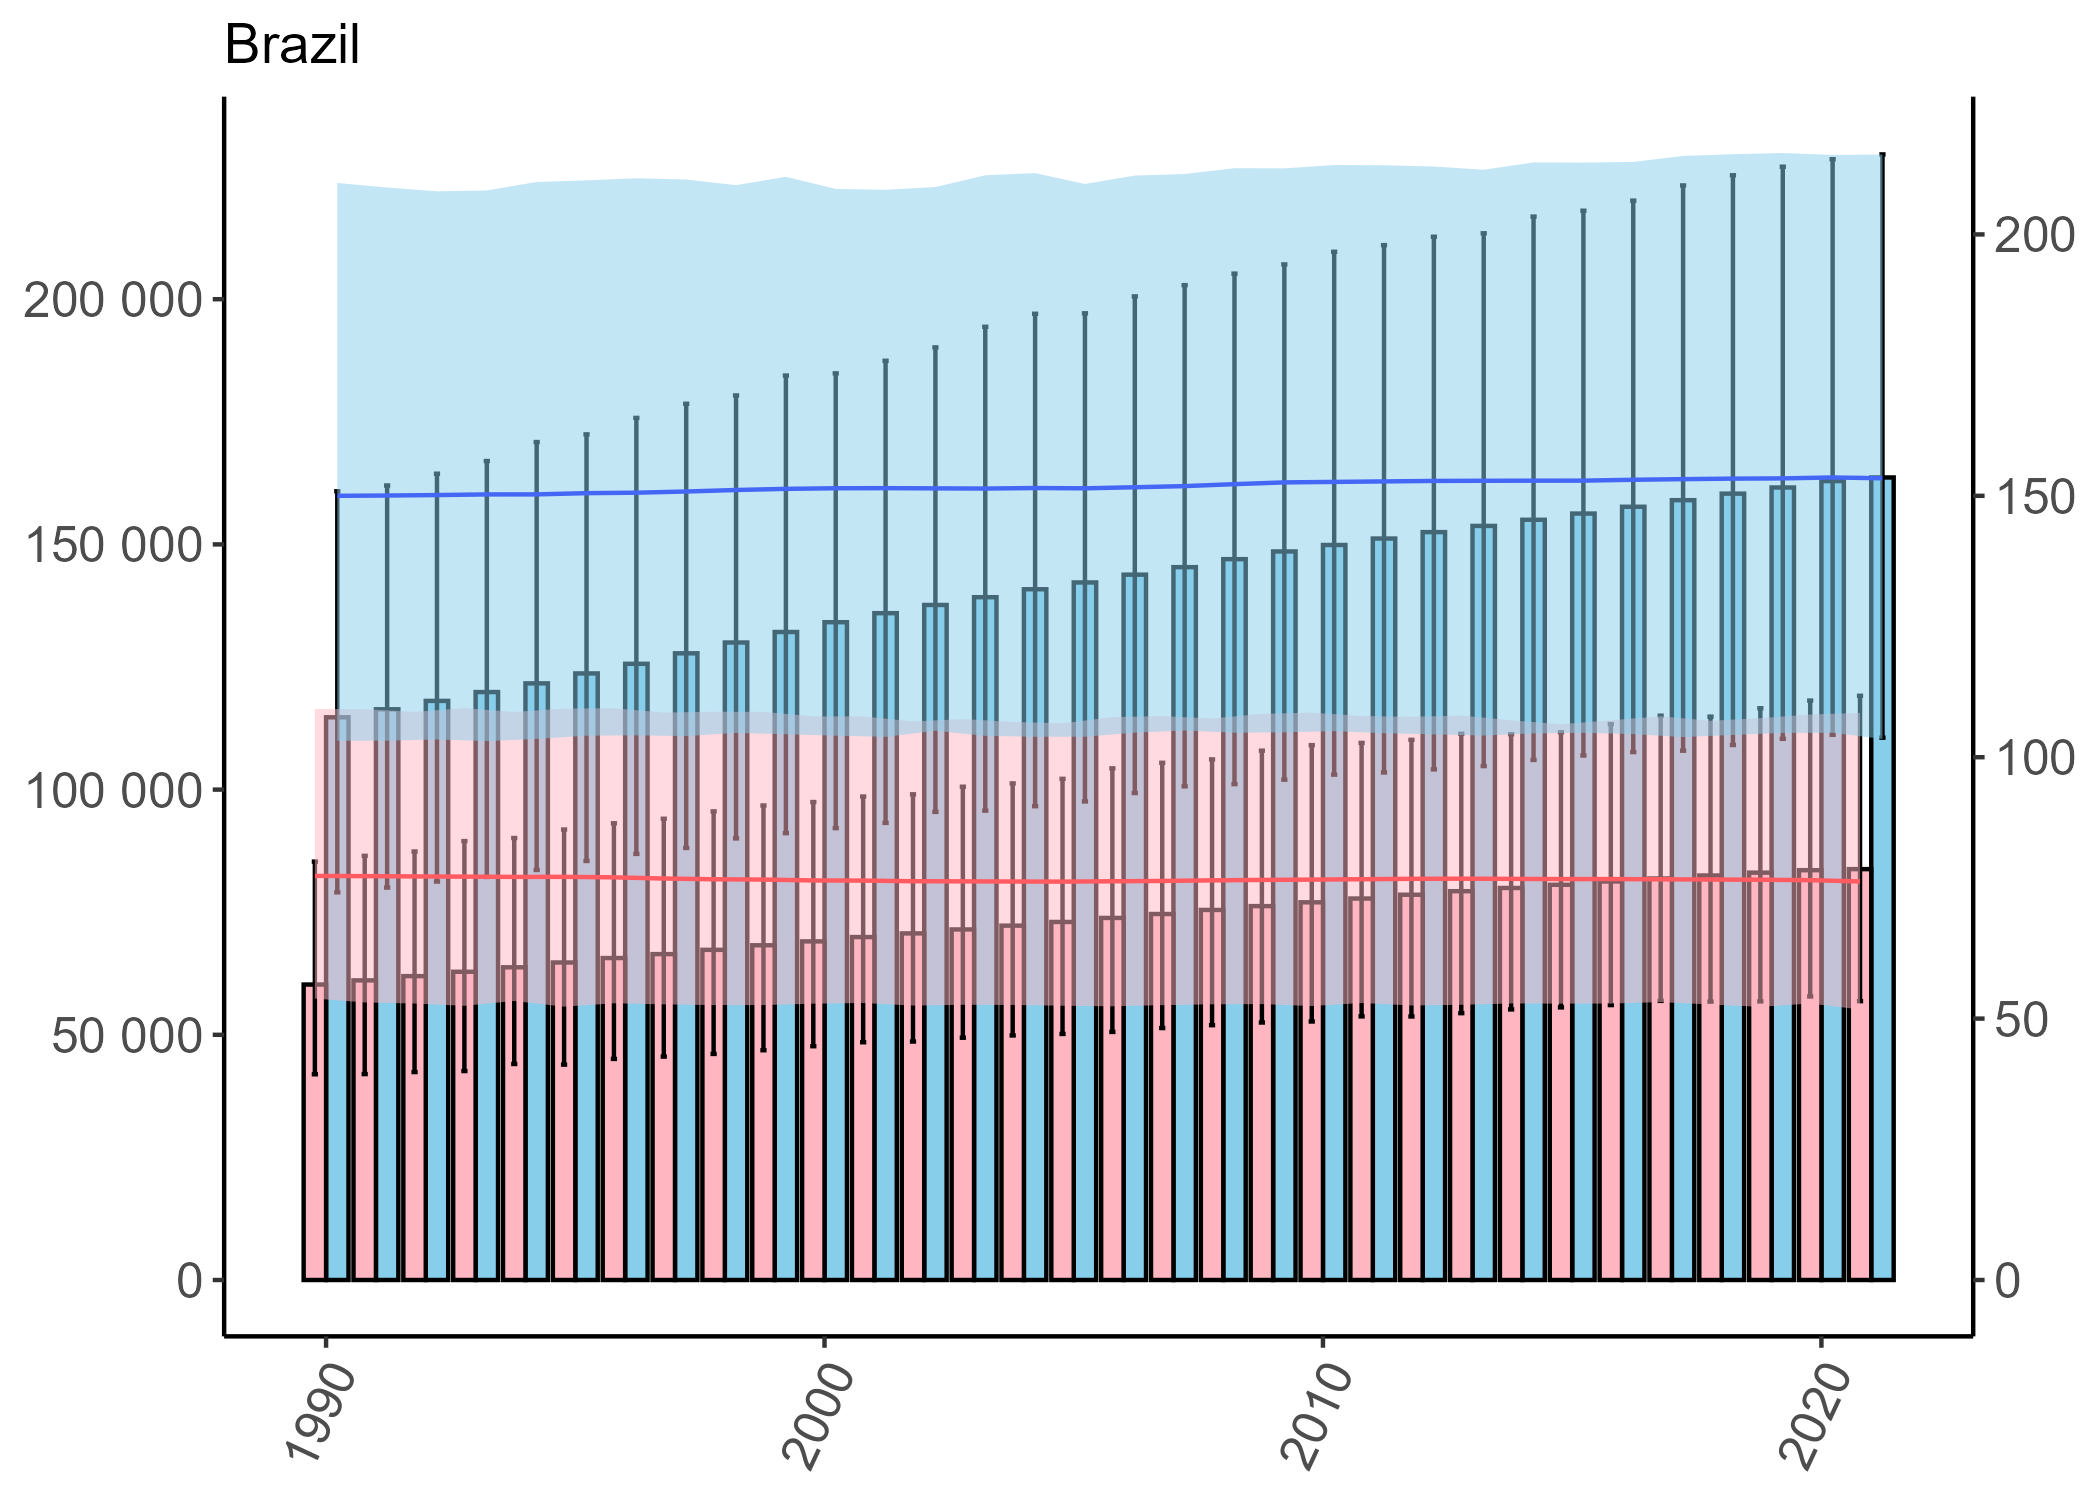

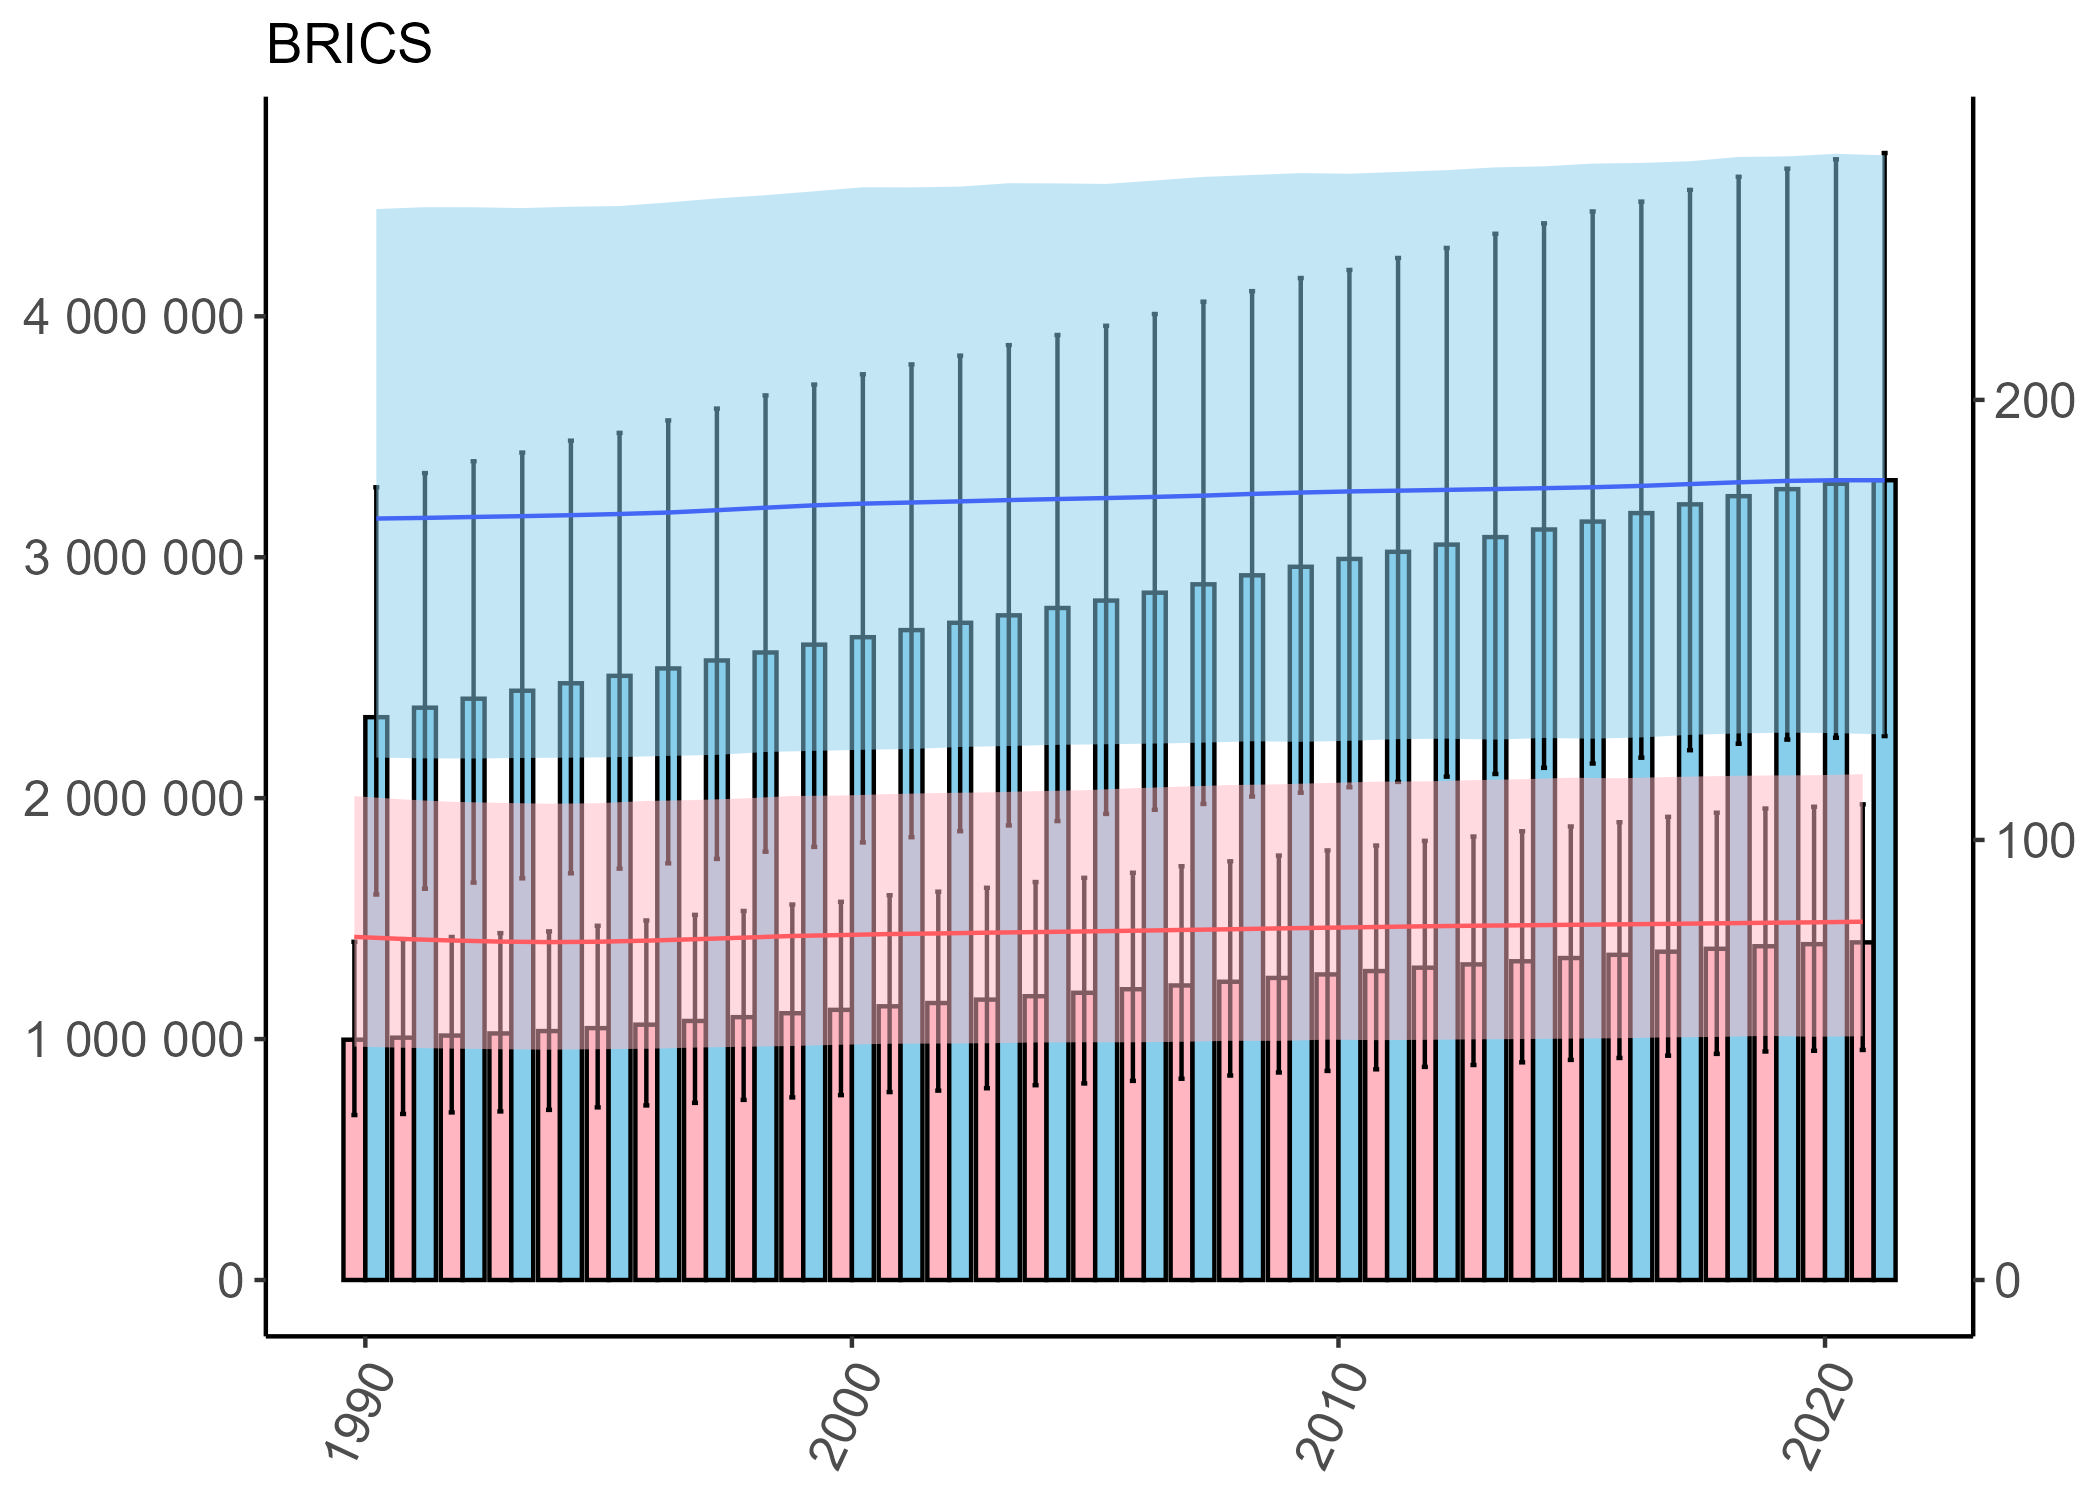

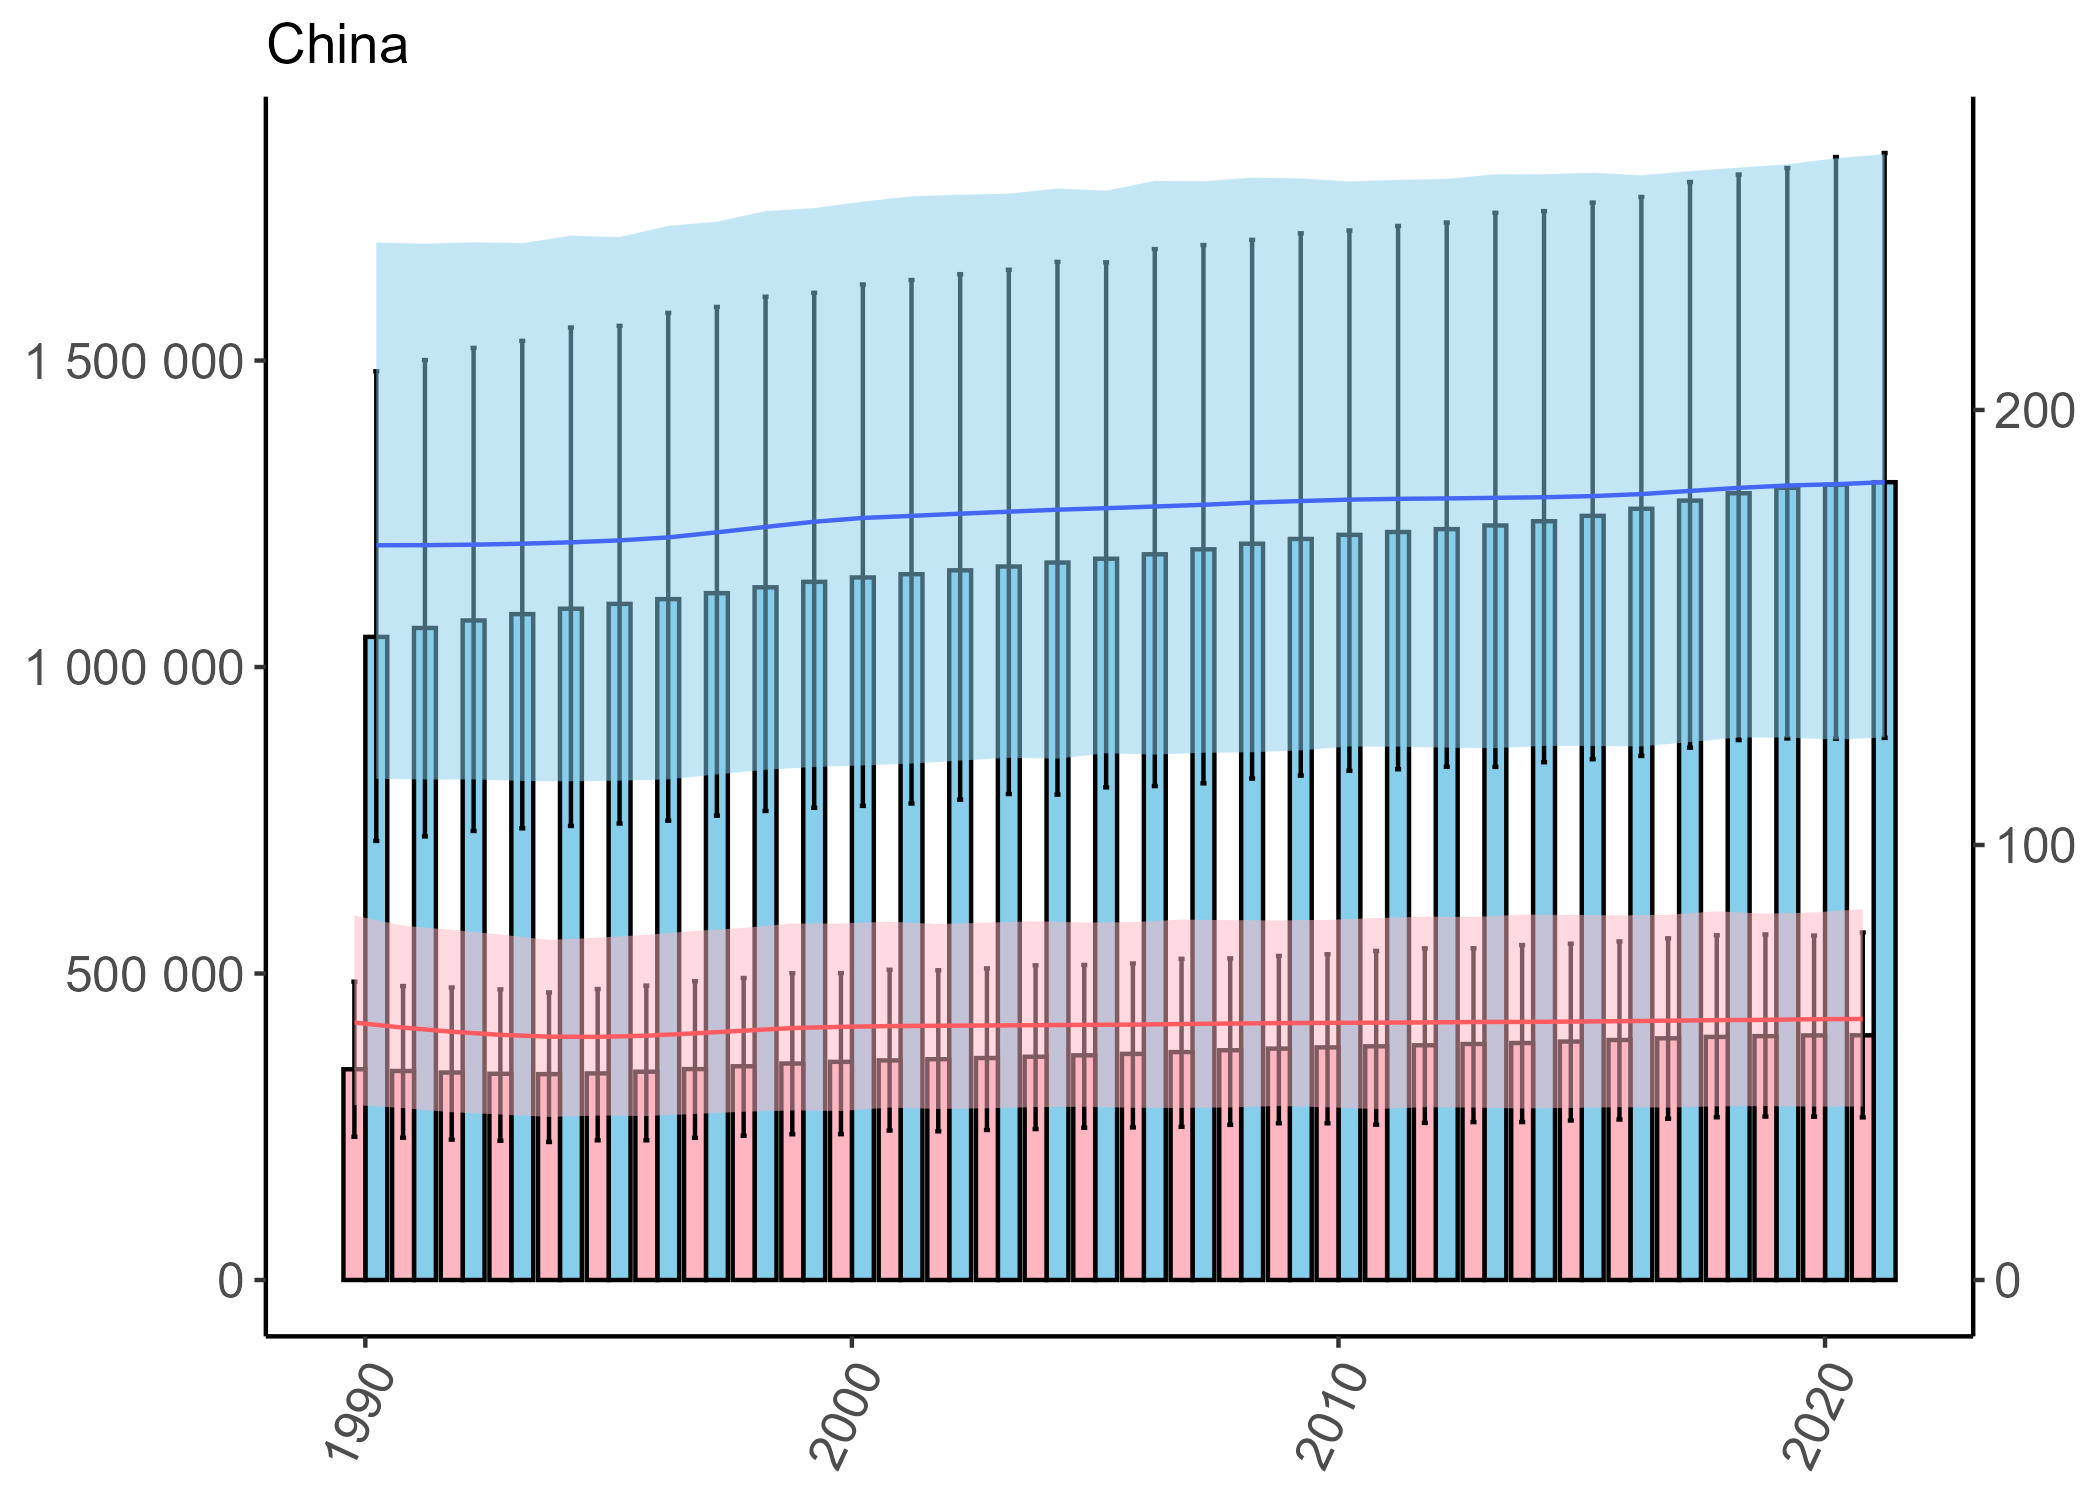

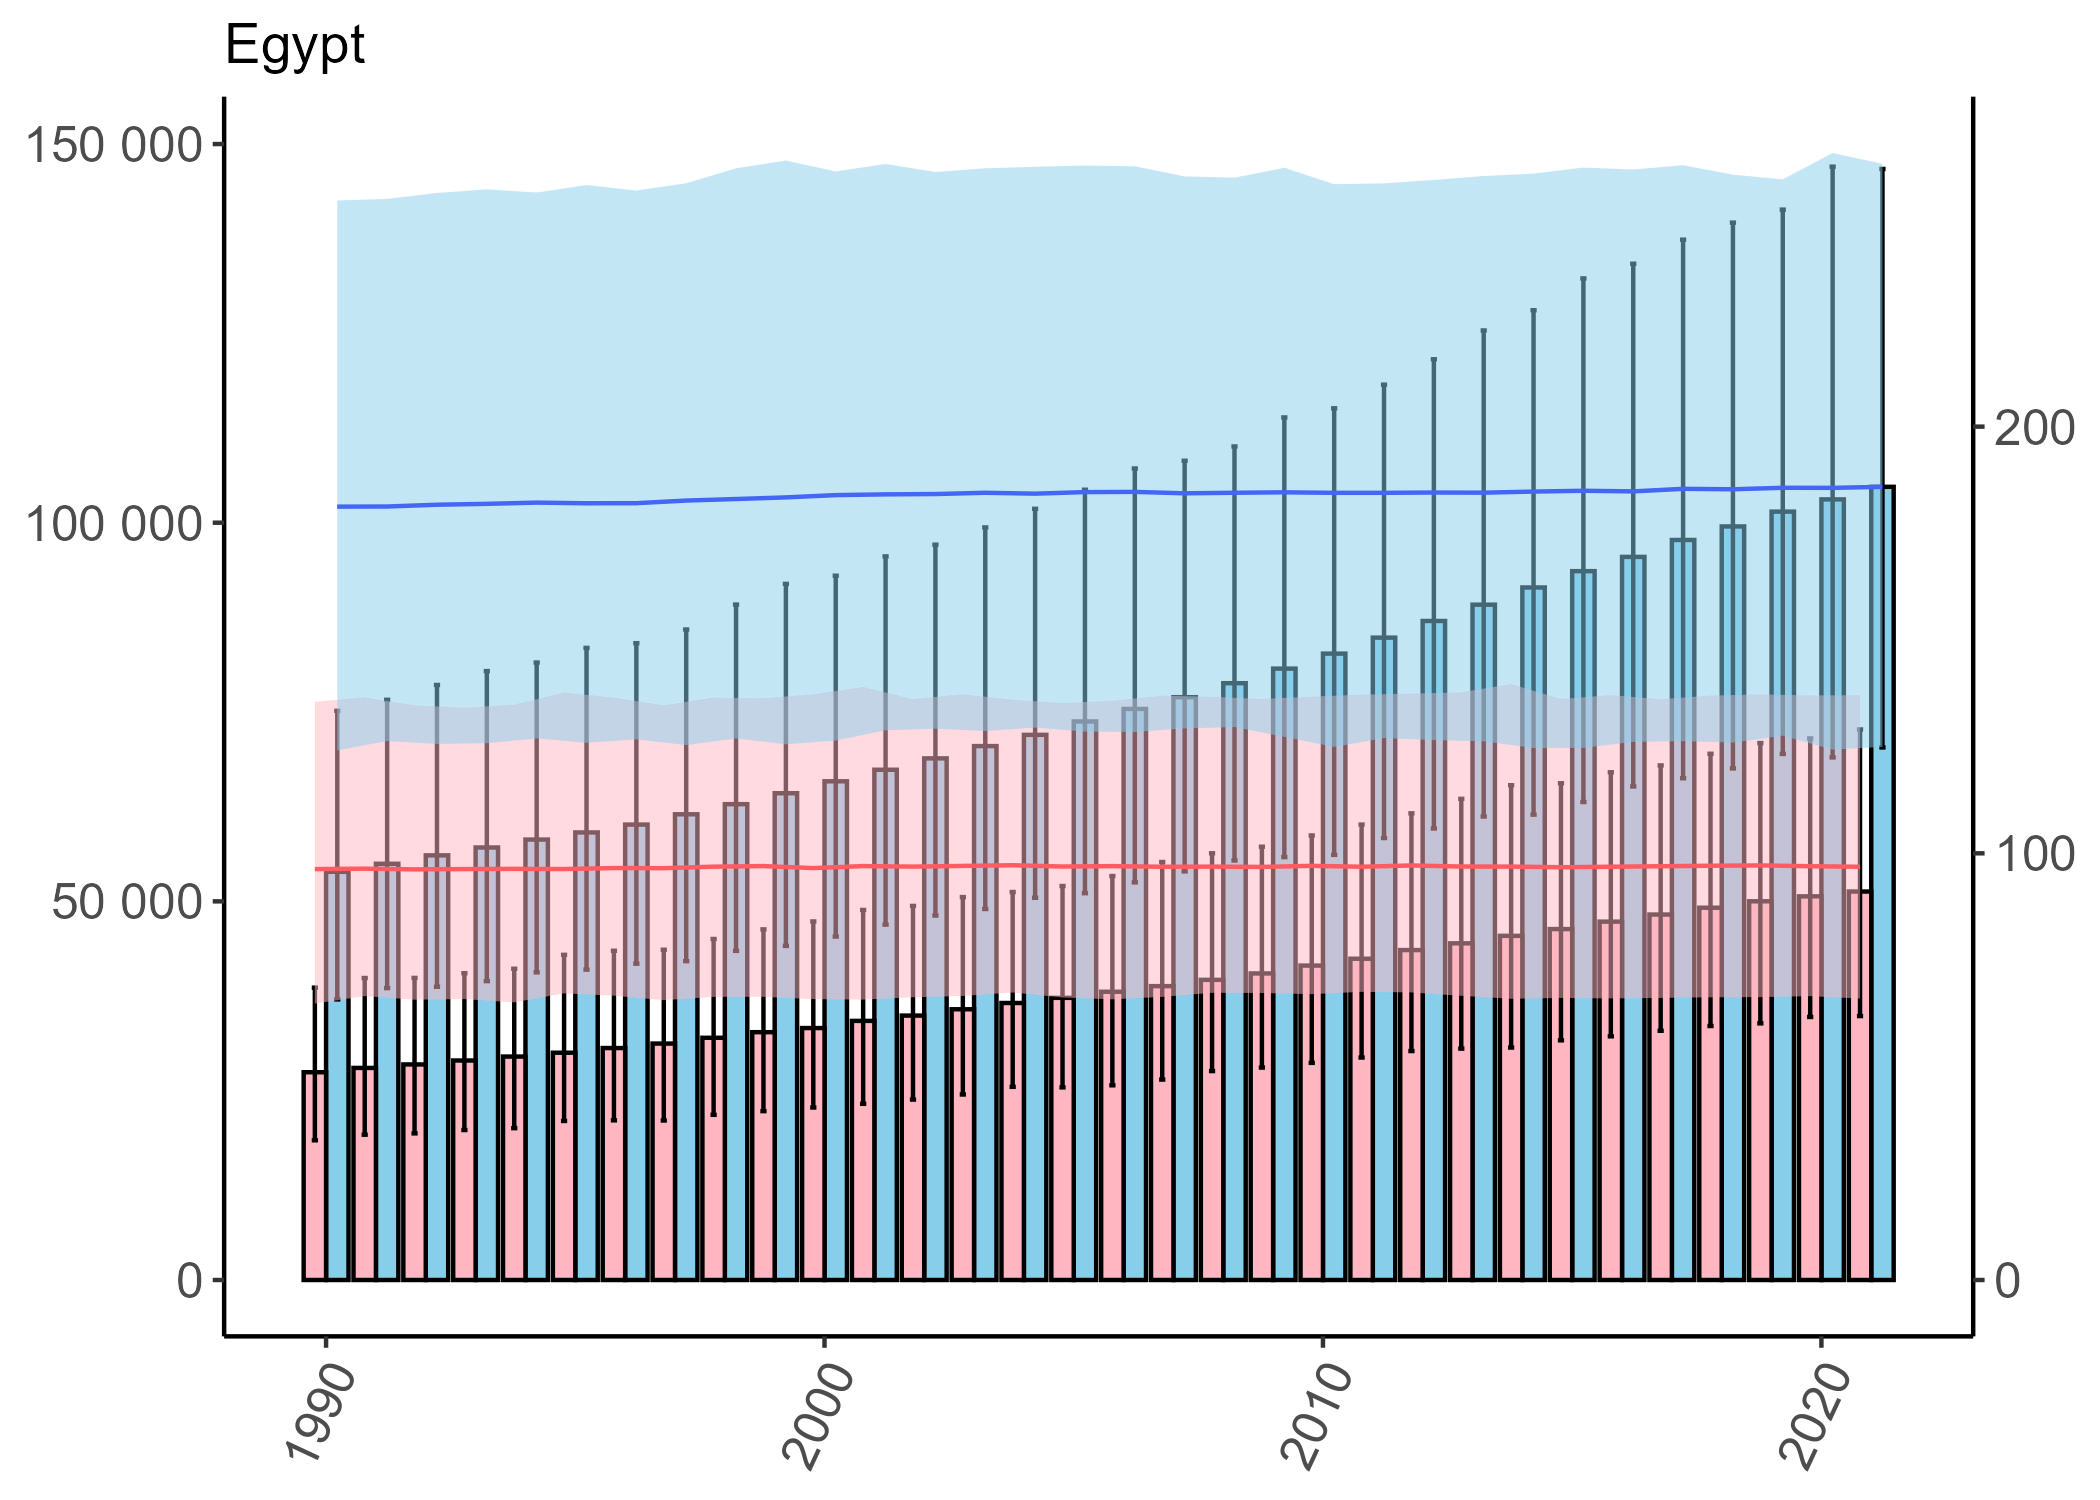

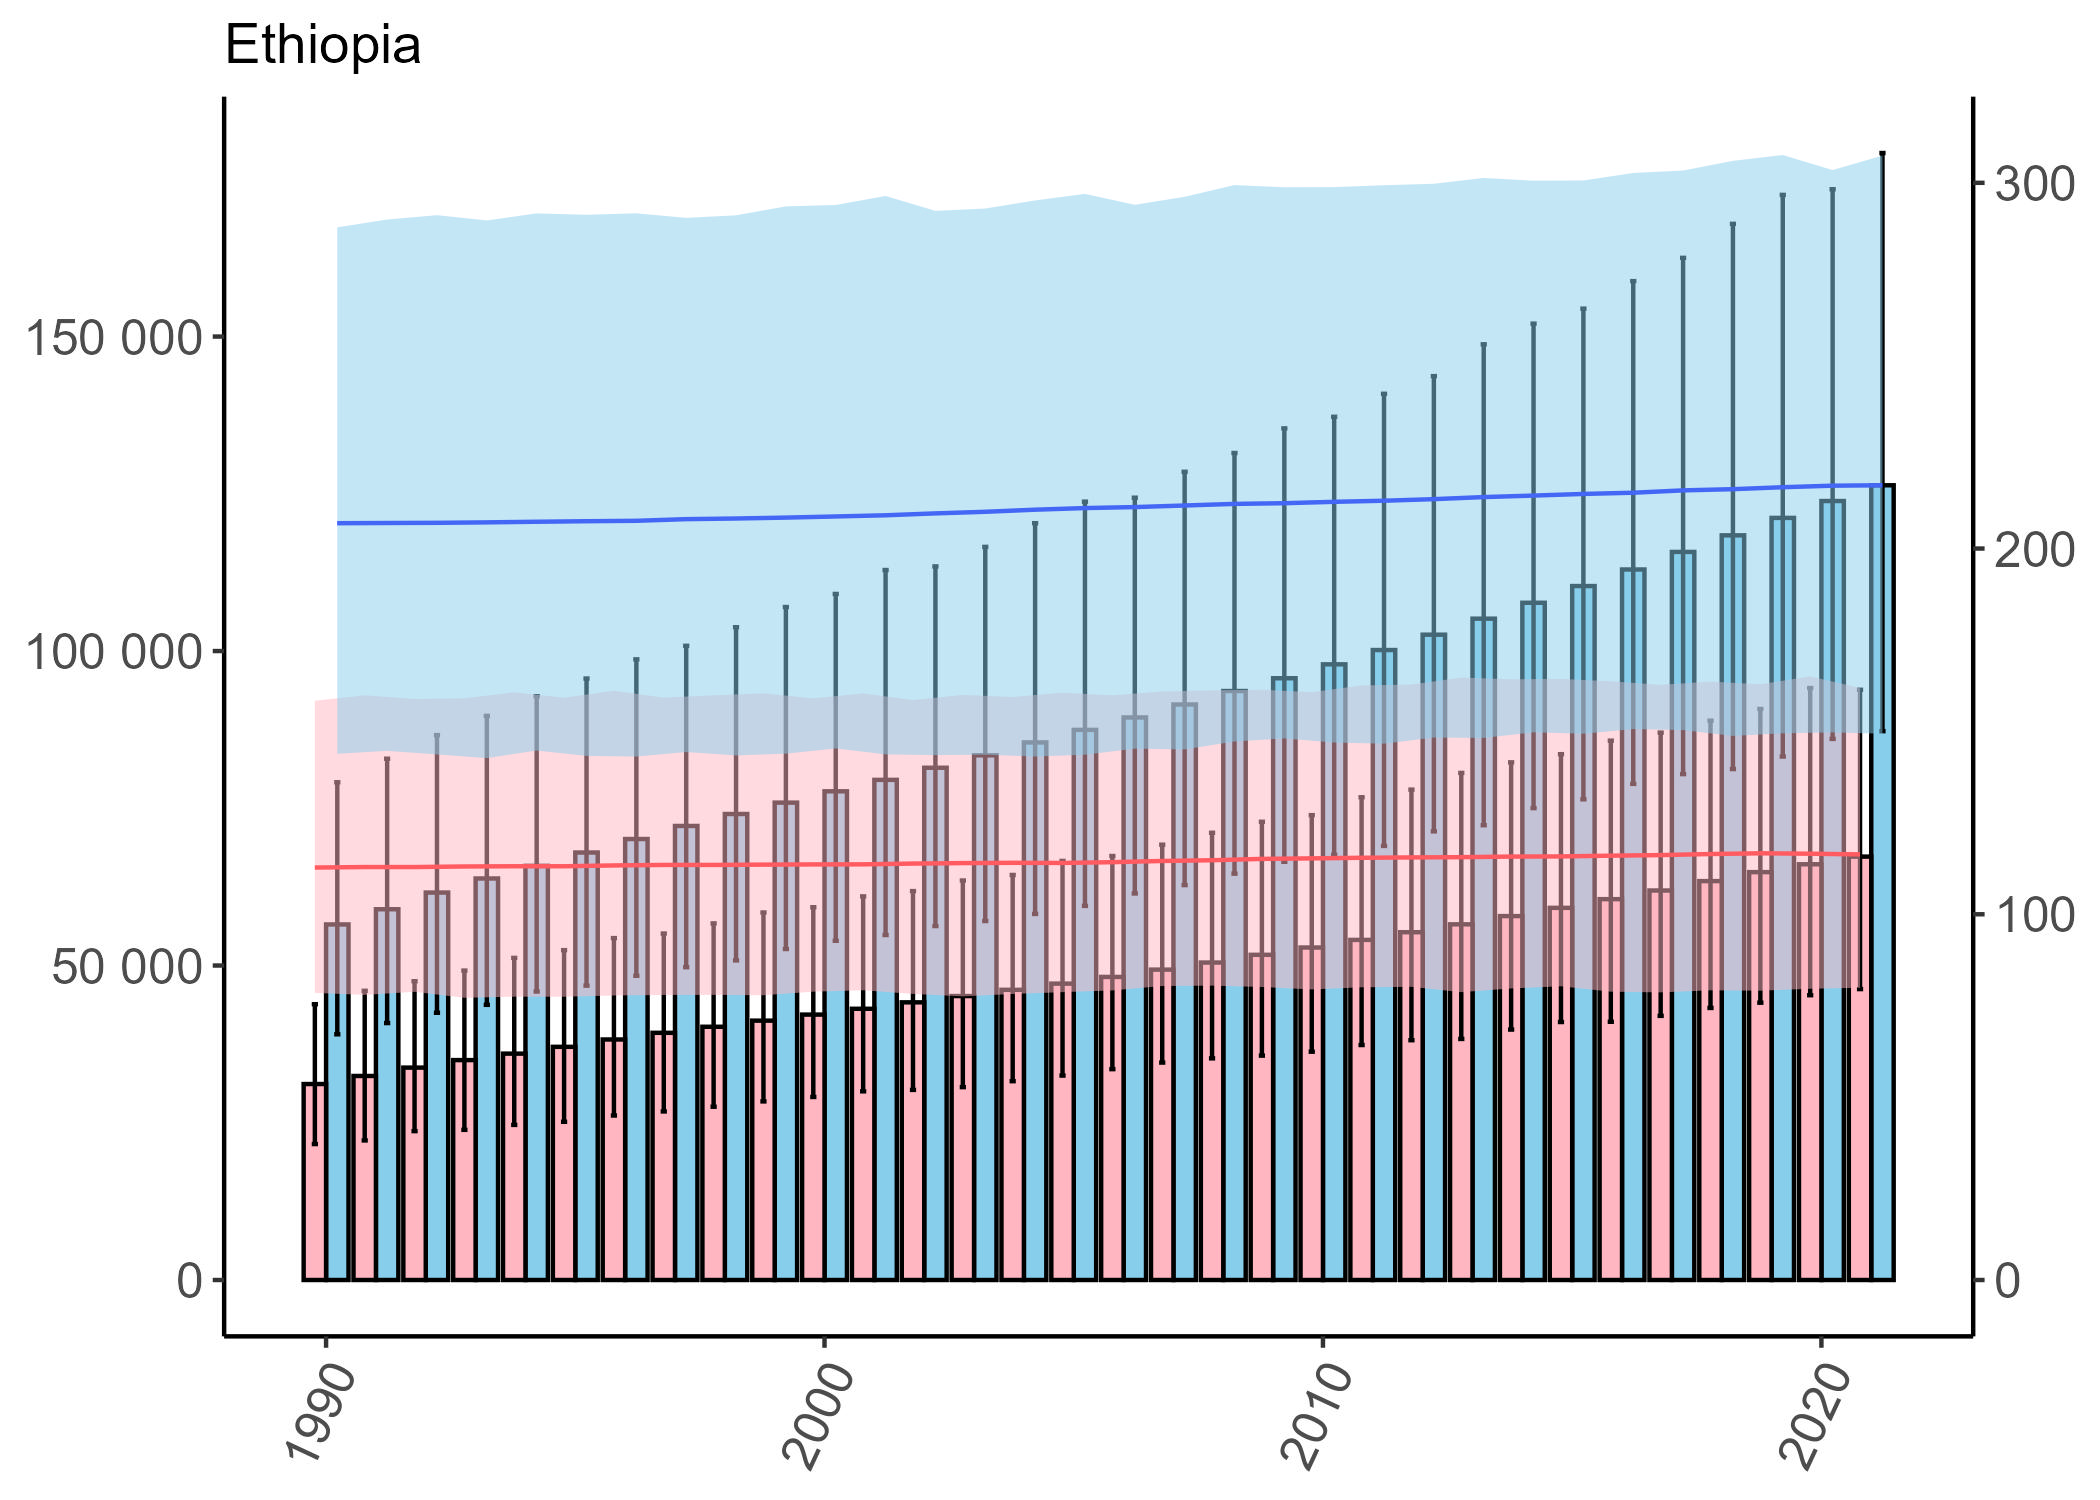

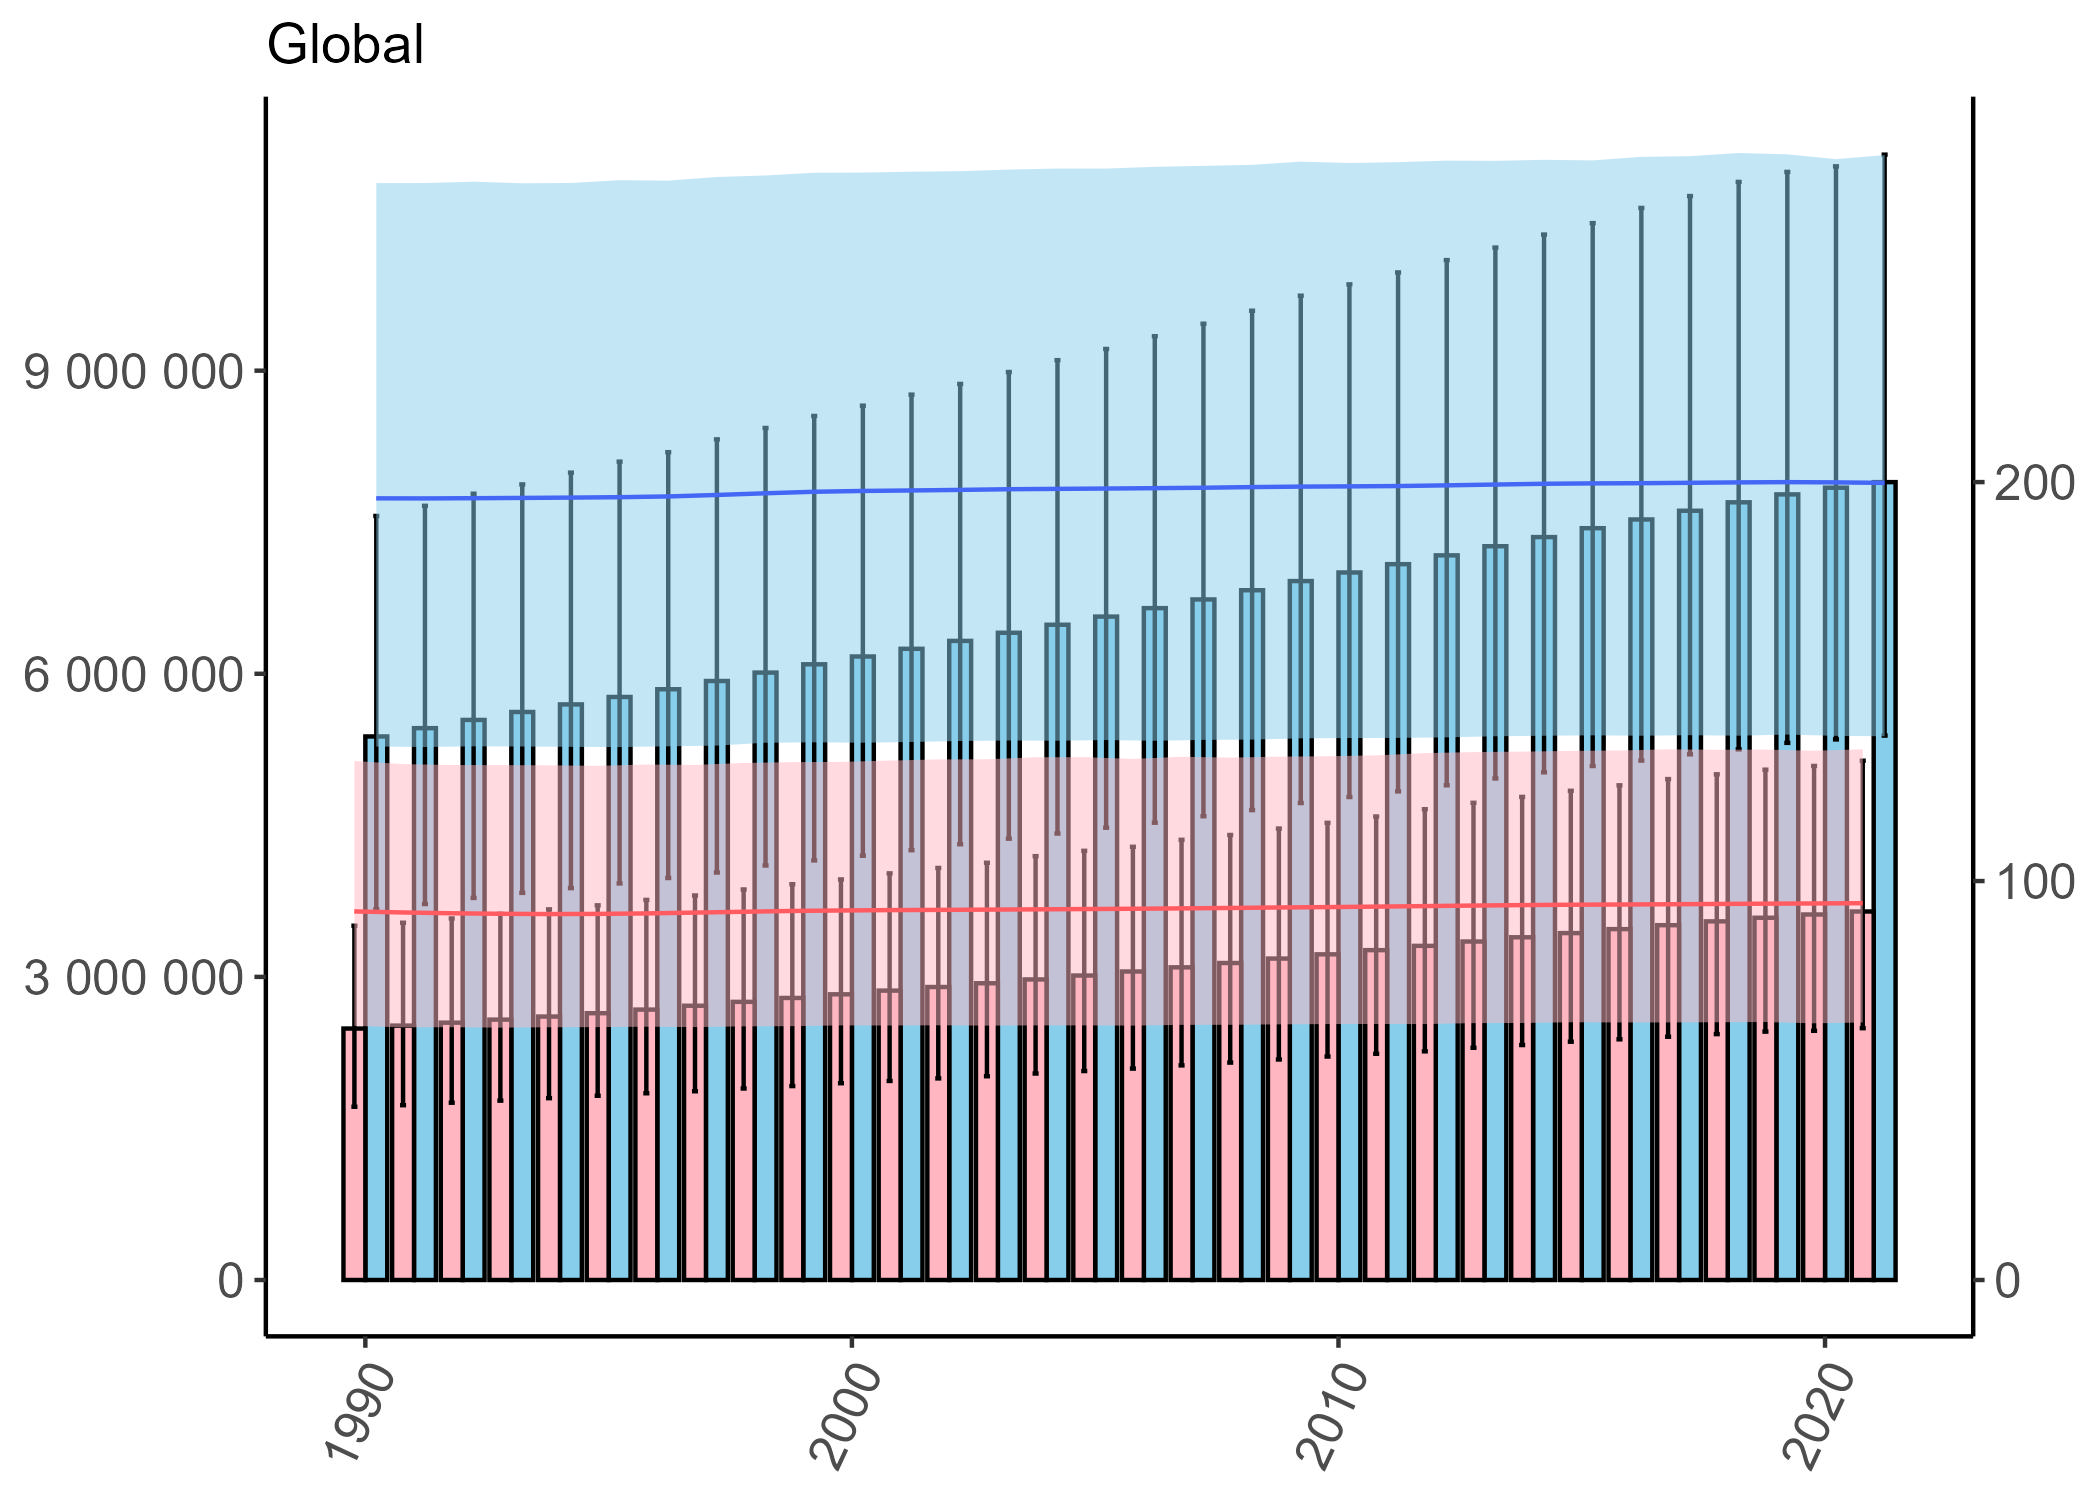

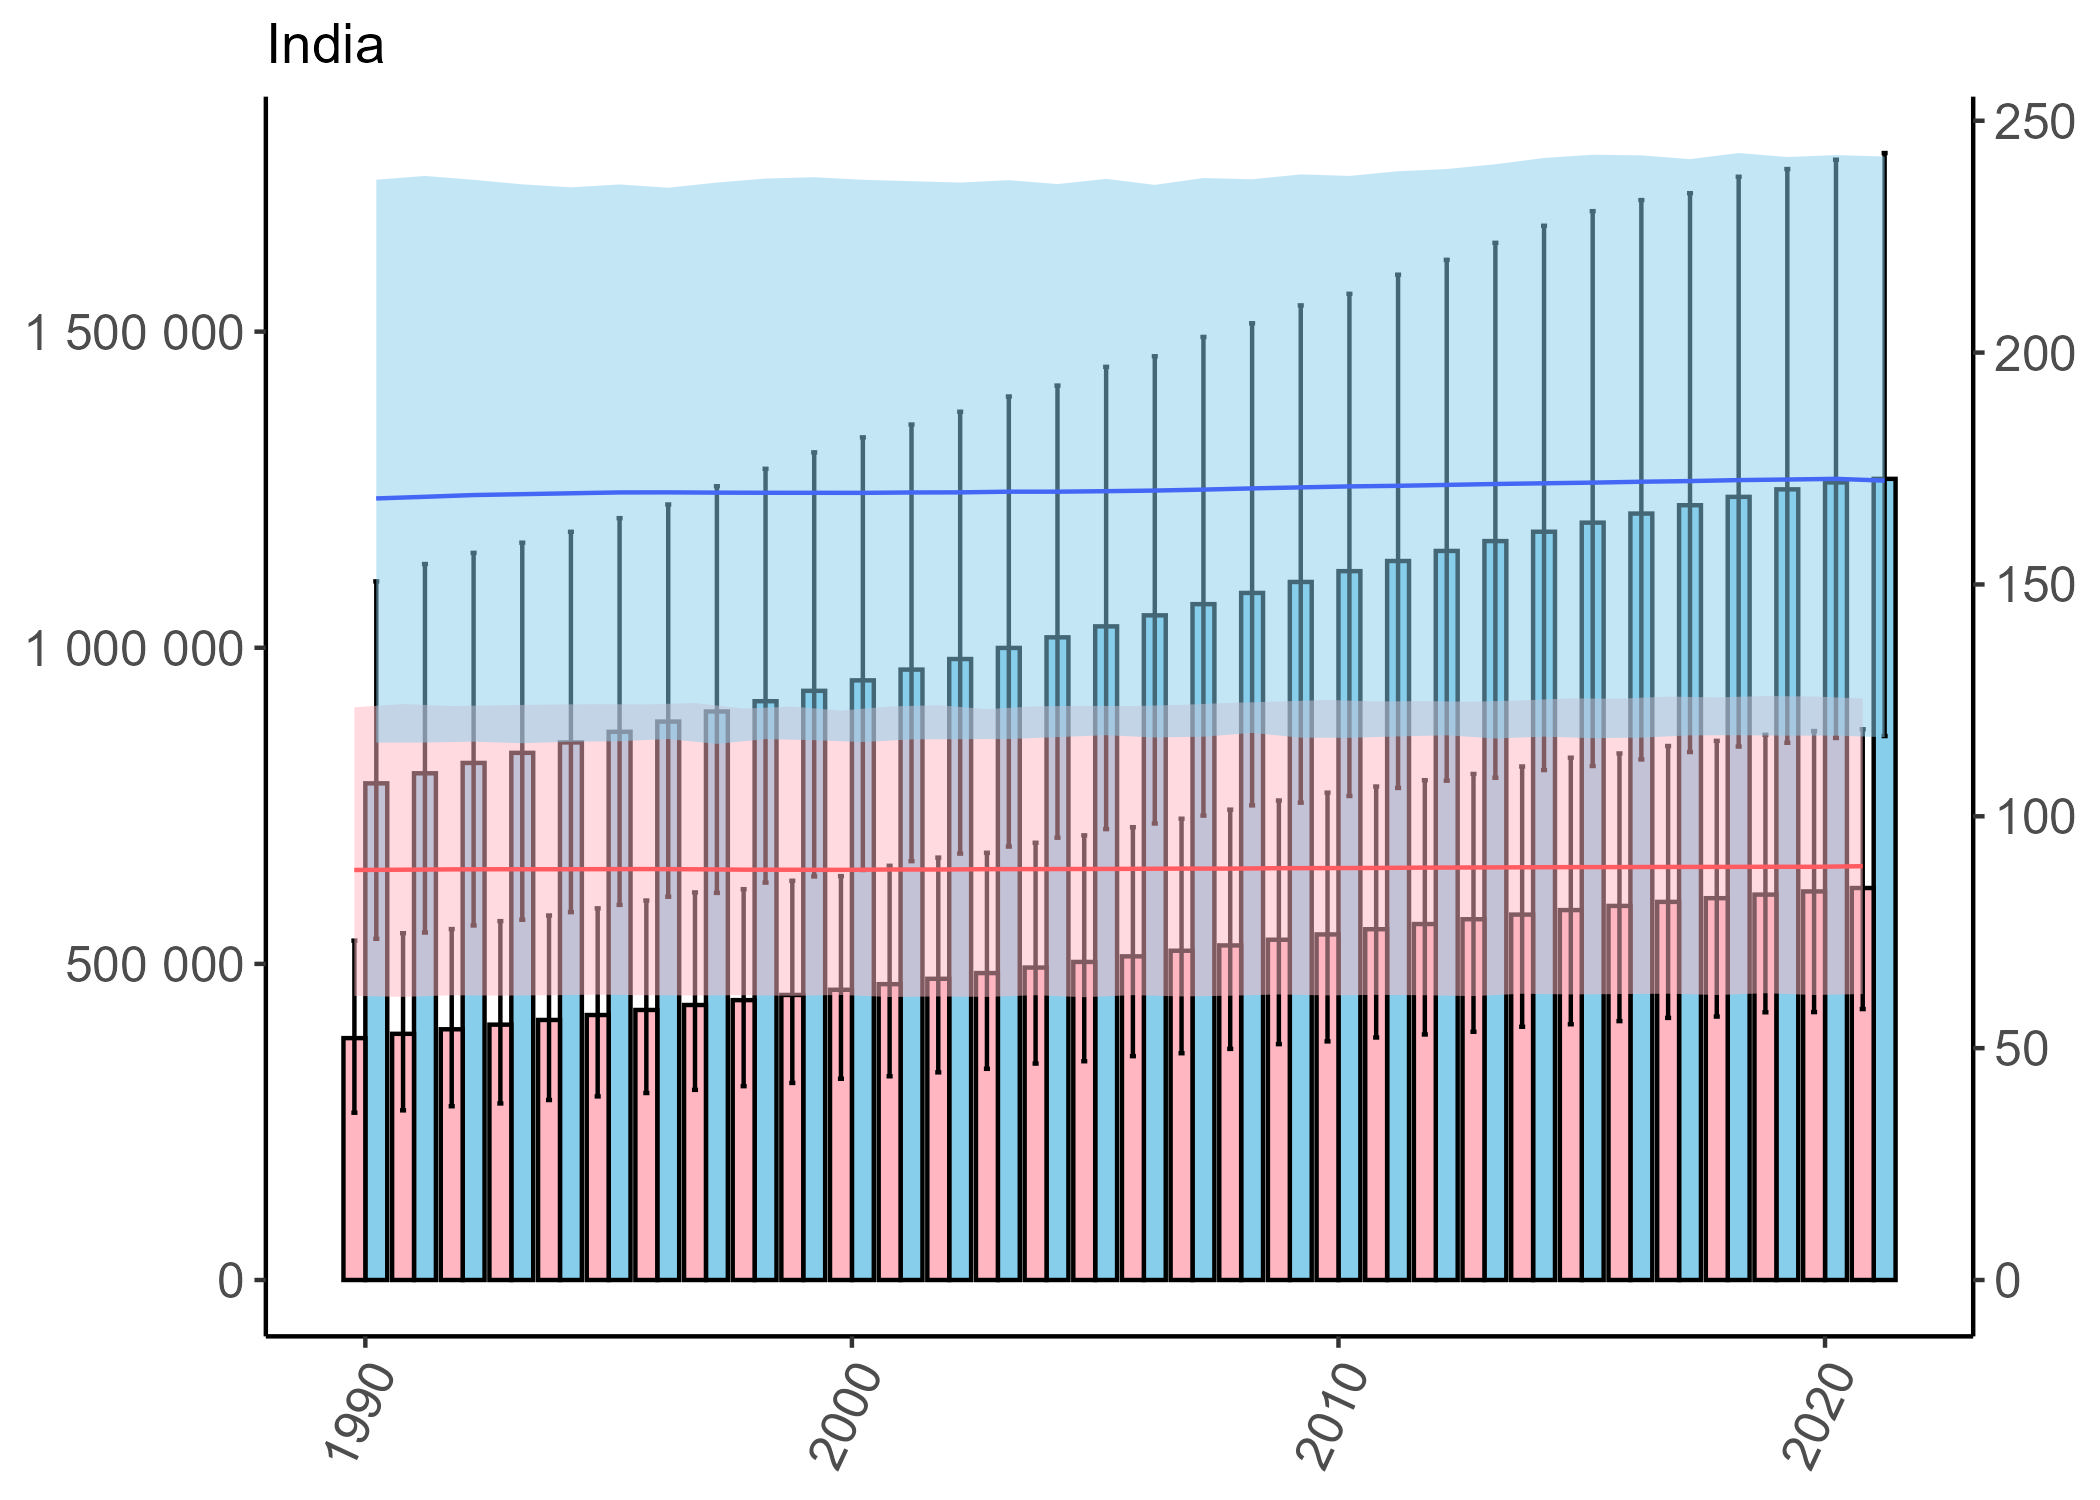

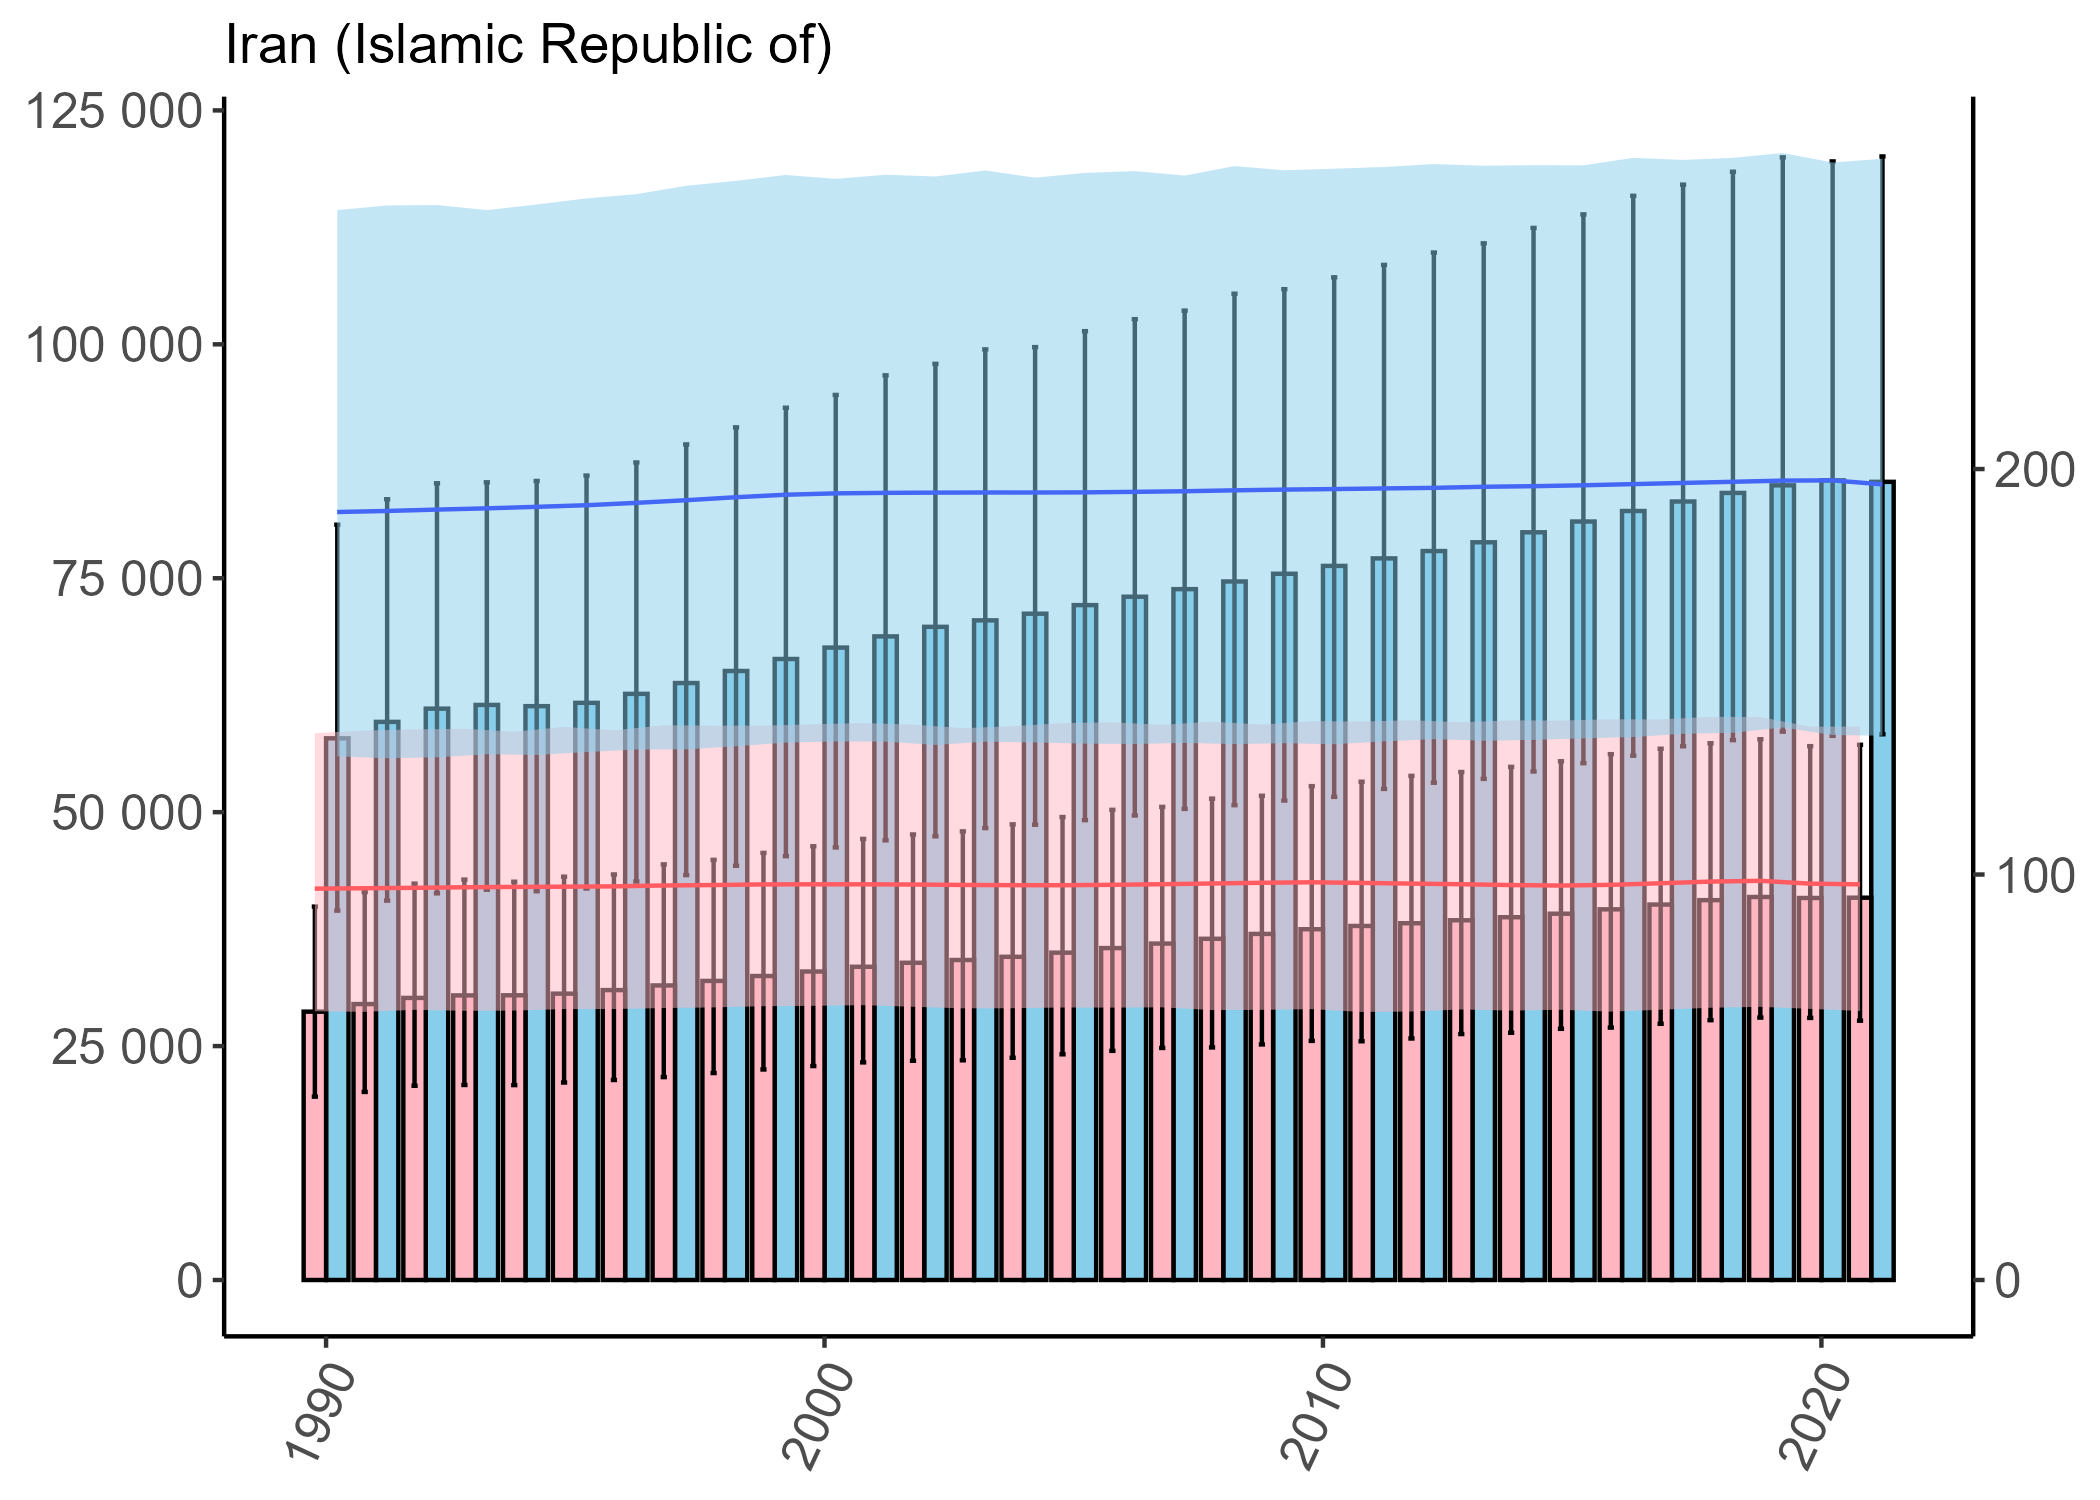

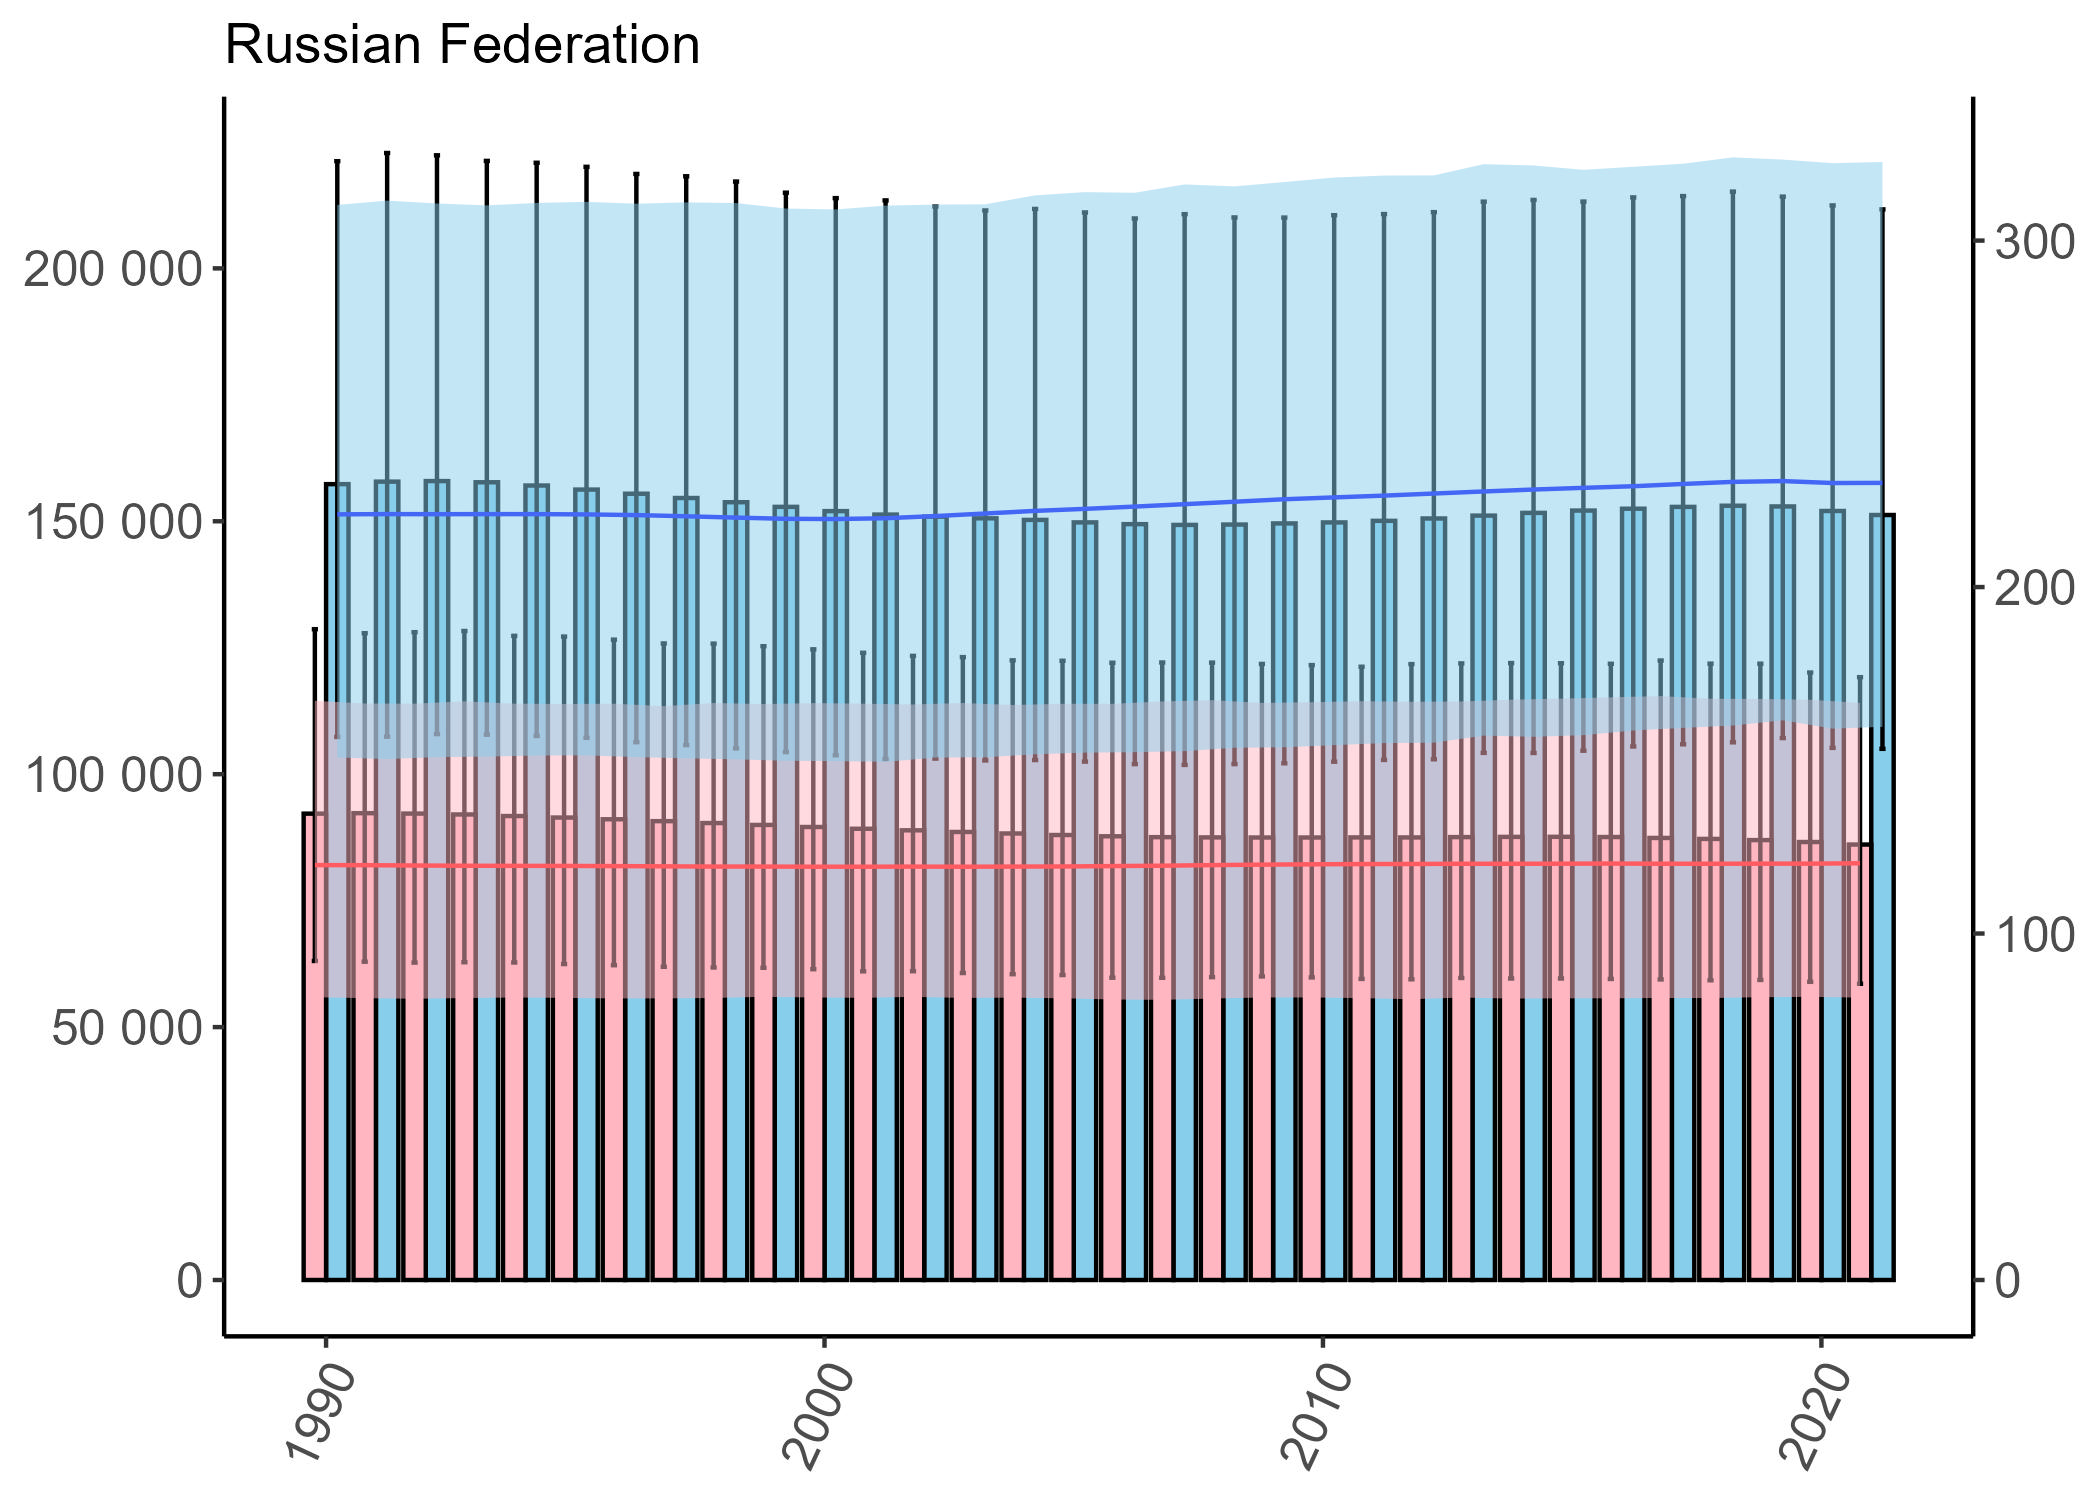

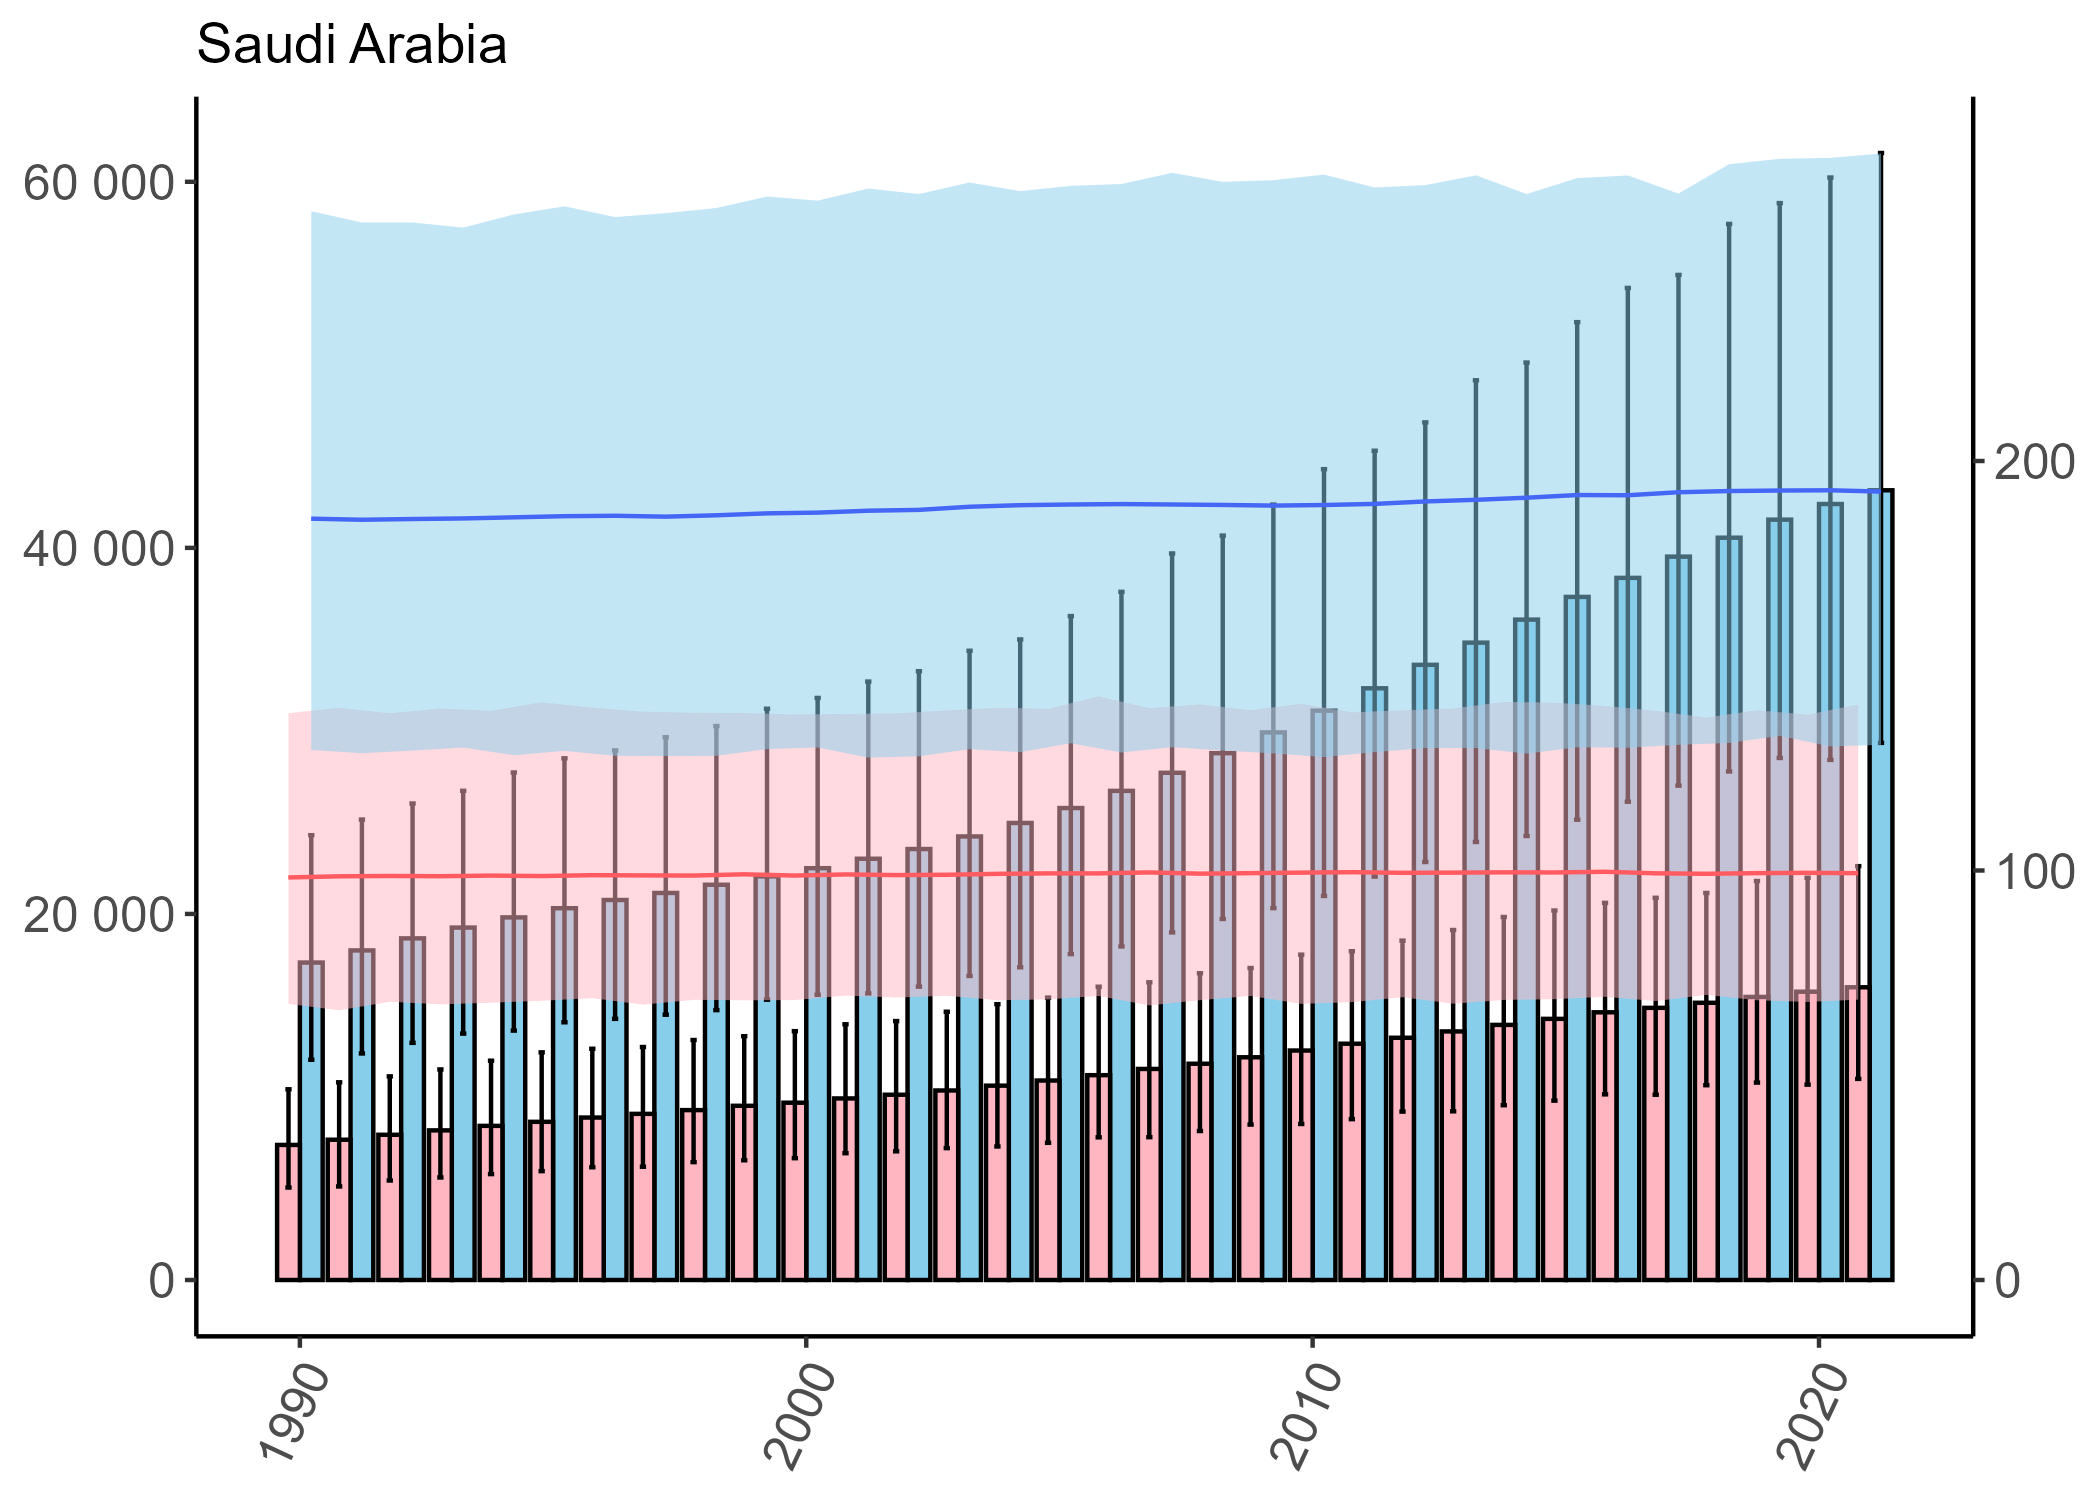

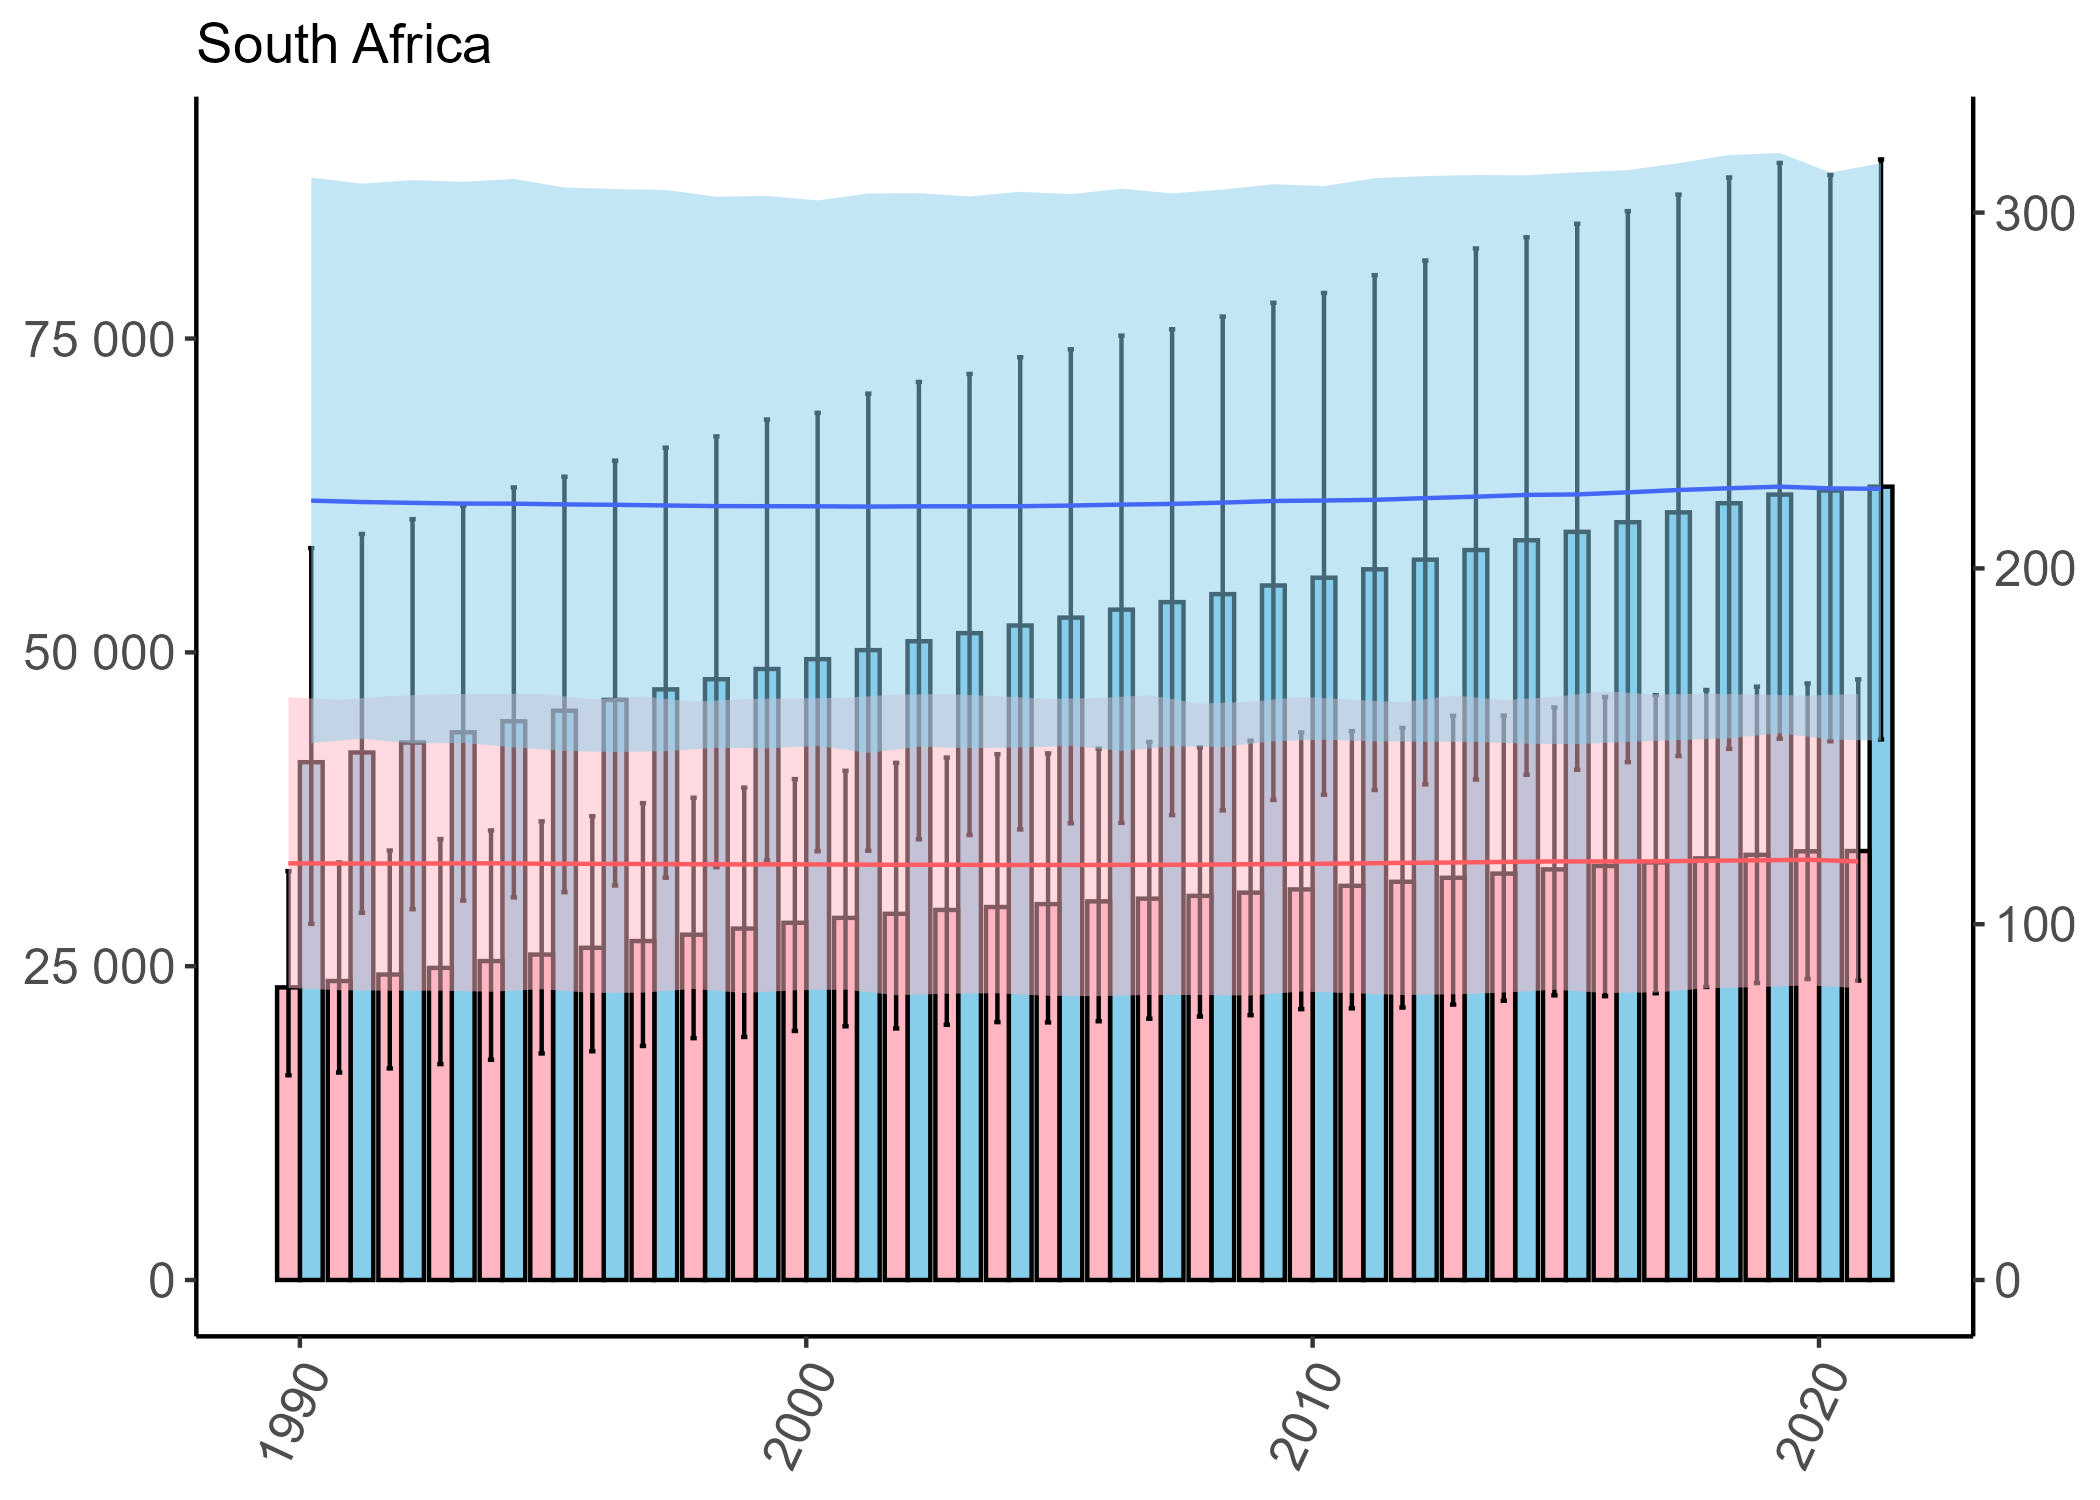

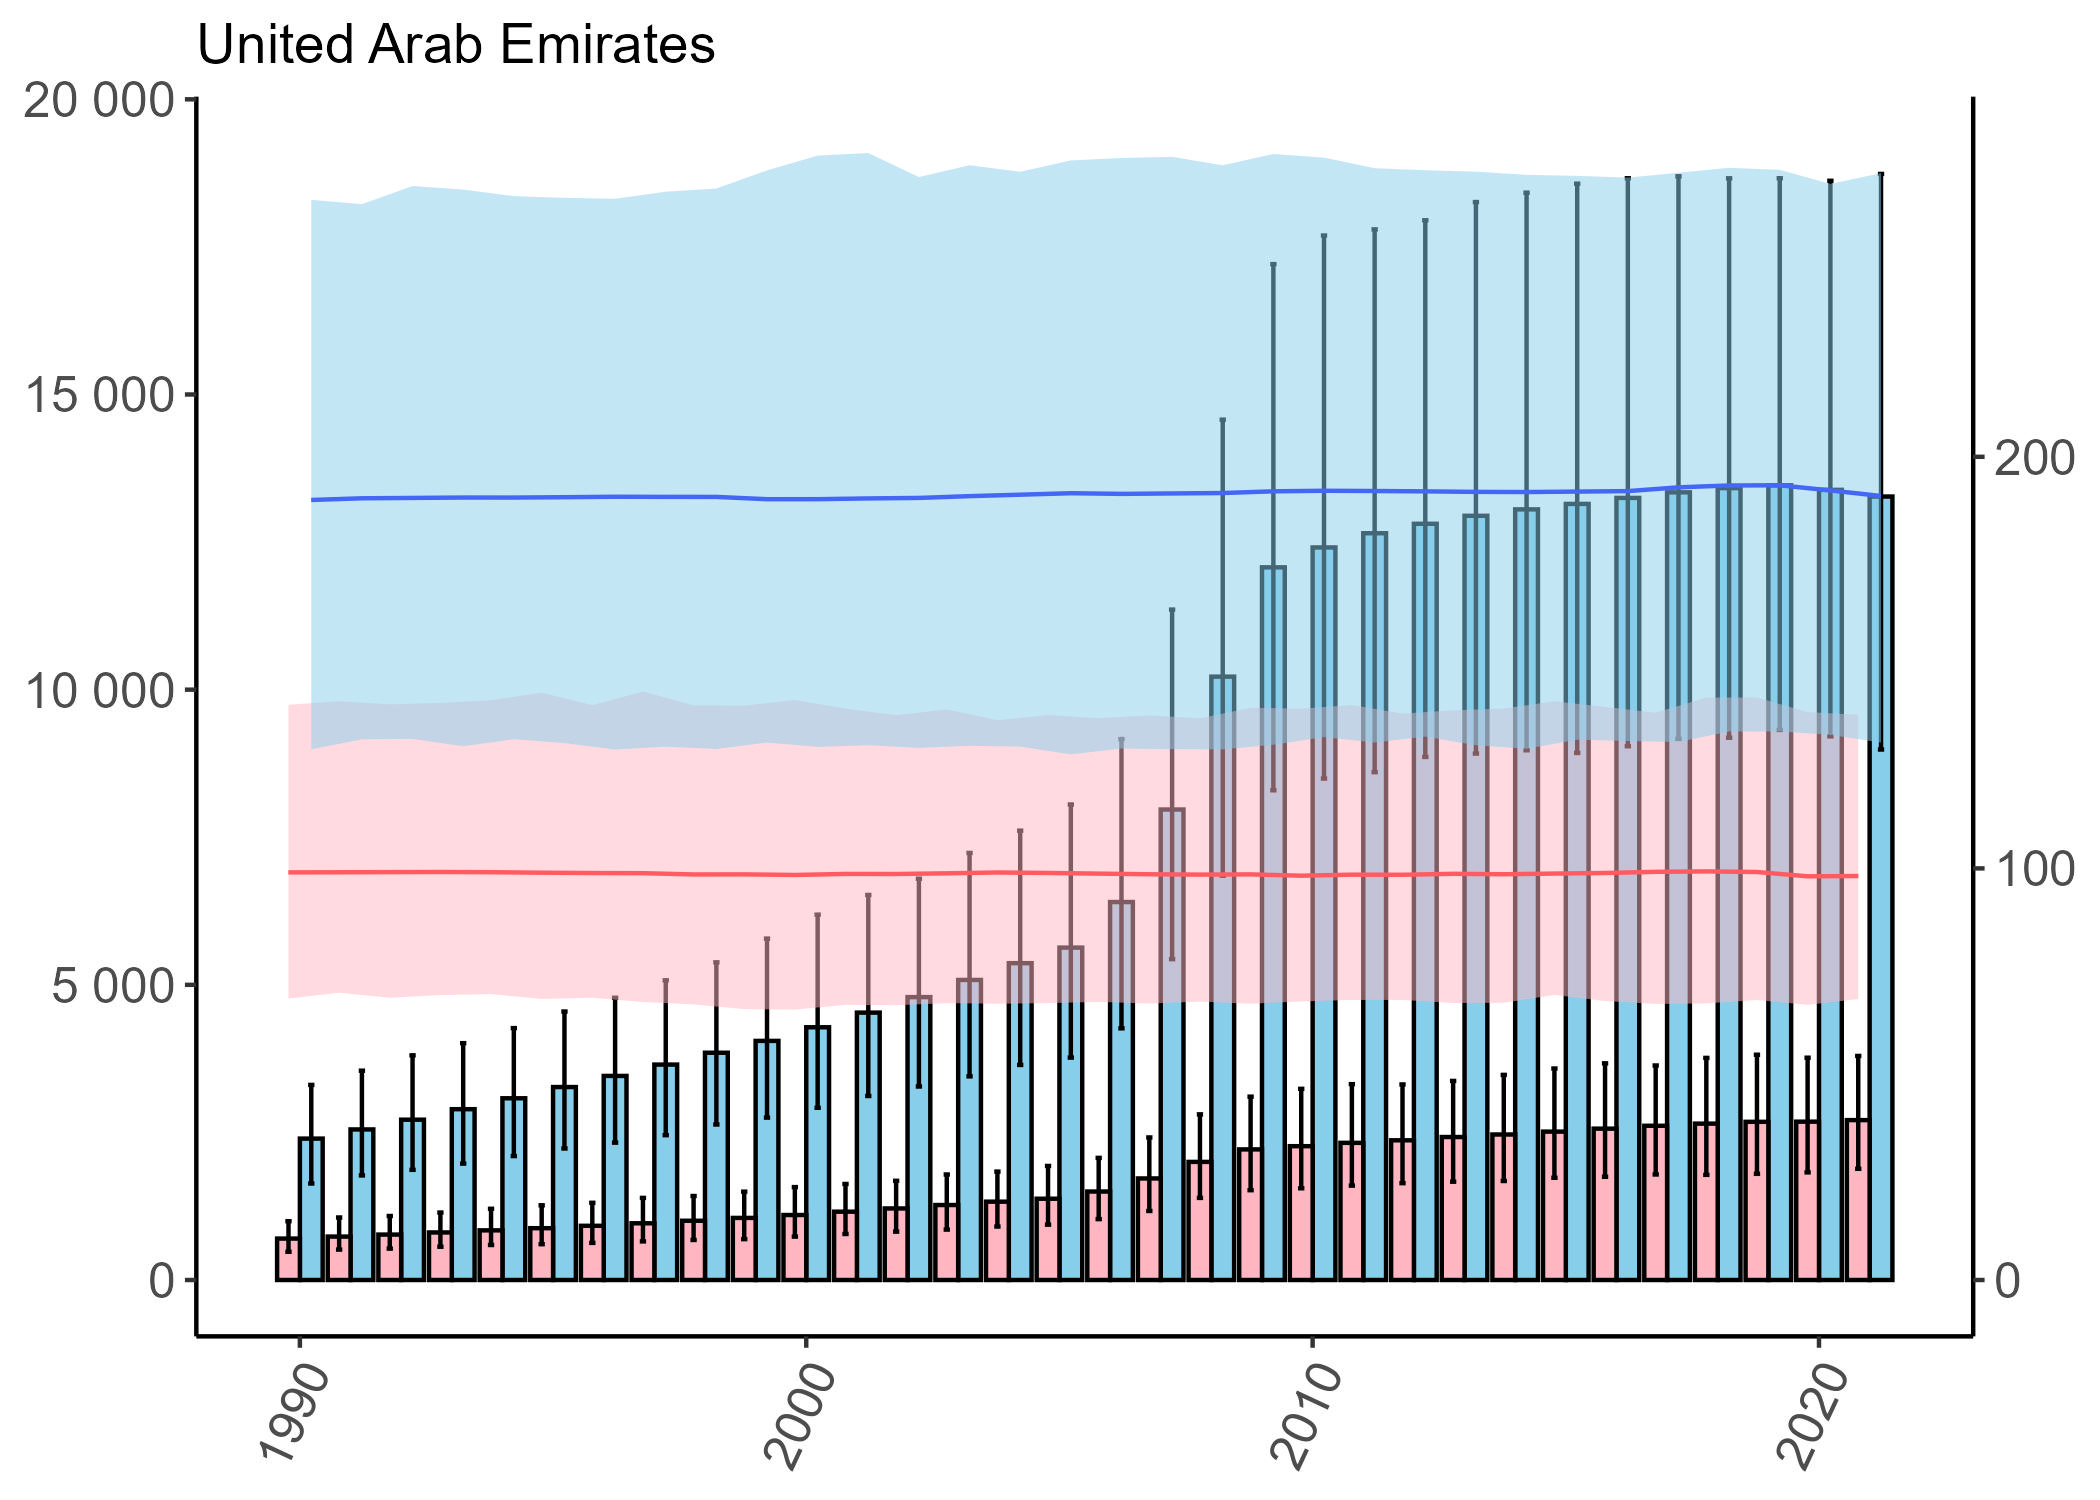

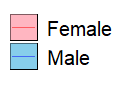

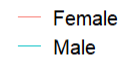

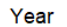

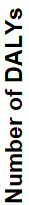

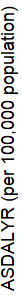


Supplemental Figure_3. The trends of Autism-Spectrum Disorder DALYs among males and females from 1990 to 2021. DALY trends by sex, with 95% uncertainty intervals shown as error bars and shaded areas.

DALYs: Disability Adjusted Life Years, ASDALYR: Age-standardized DALYs rate, BRICS: Brazil, Russian Federation, India, China, South Africa, Egypt, Ethiopia, Saudi Arabia, Iran, United Arab Emirates; Error bars indicate the 95% uncertainty level (UI) for the number of DALYs; Shading indicates the 95% UI for the age-standardized prevalence rate.


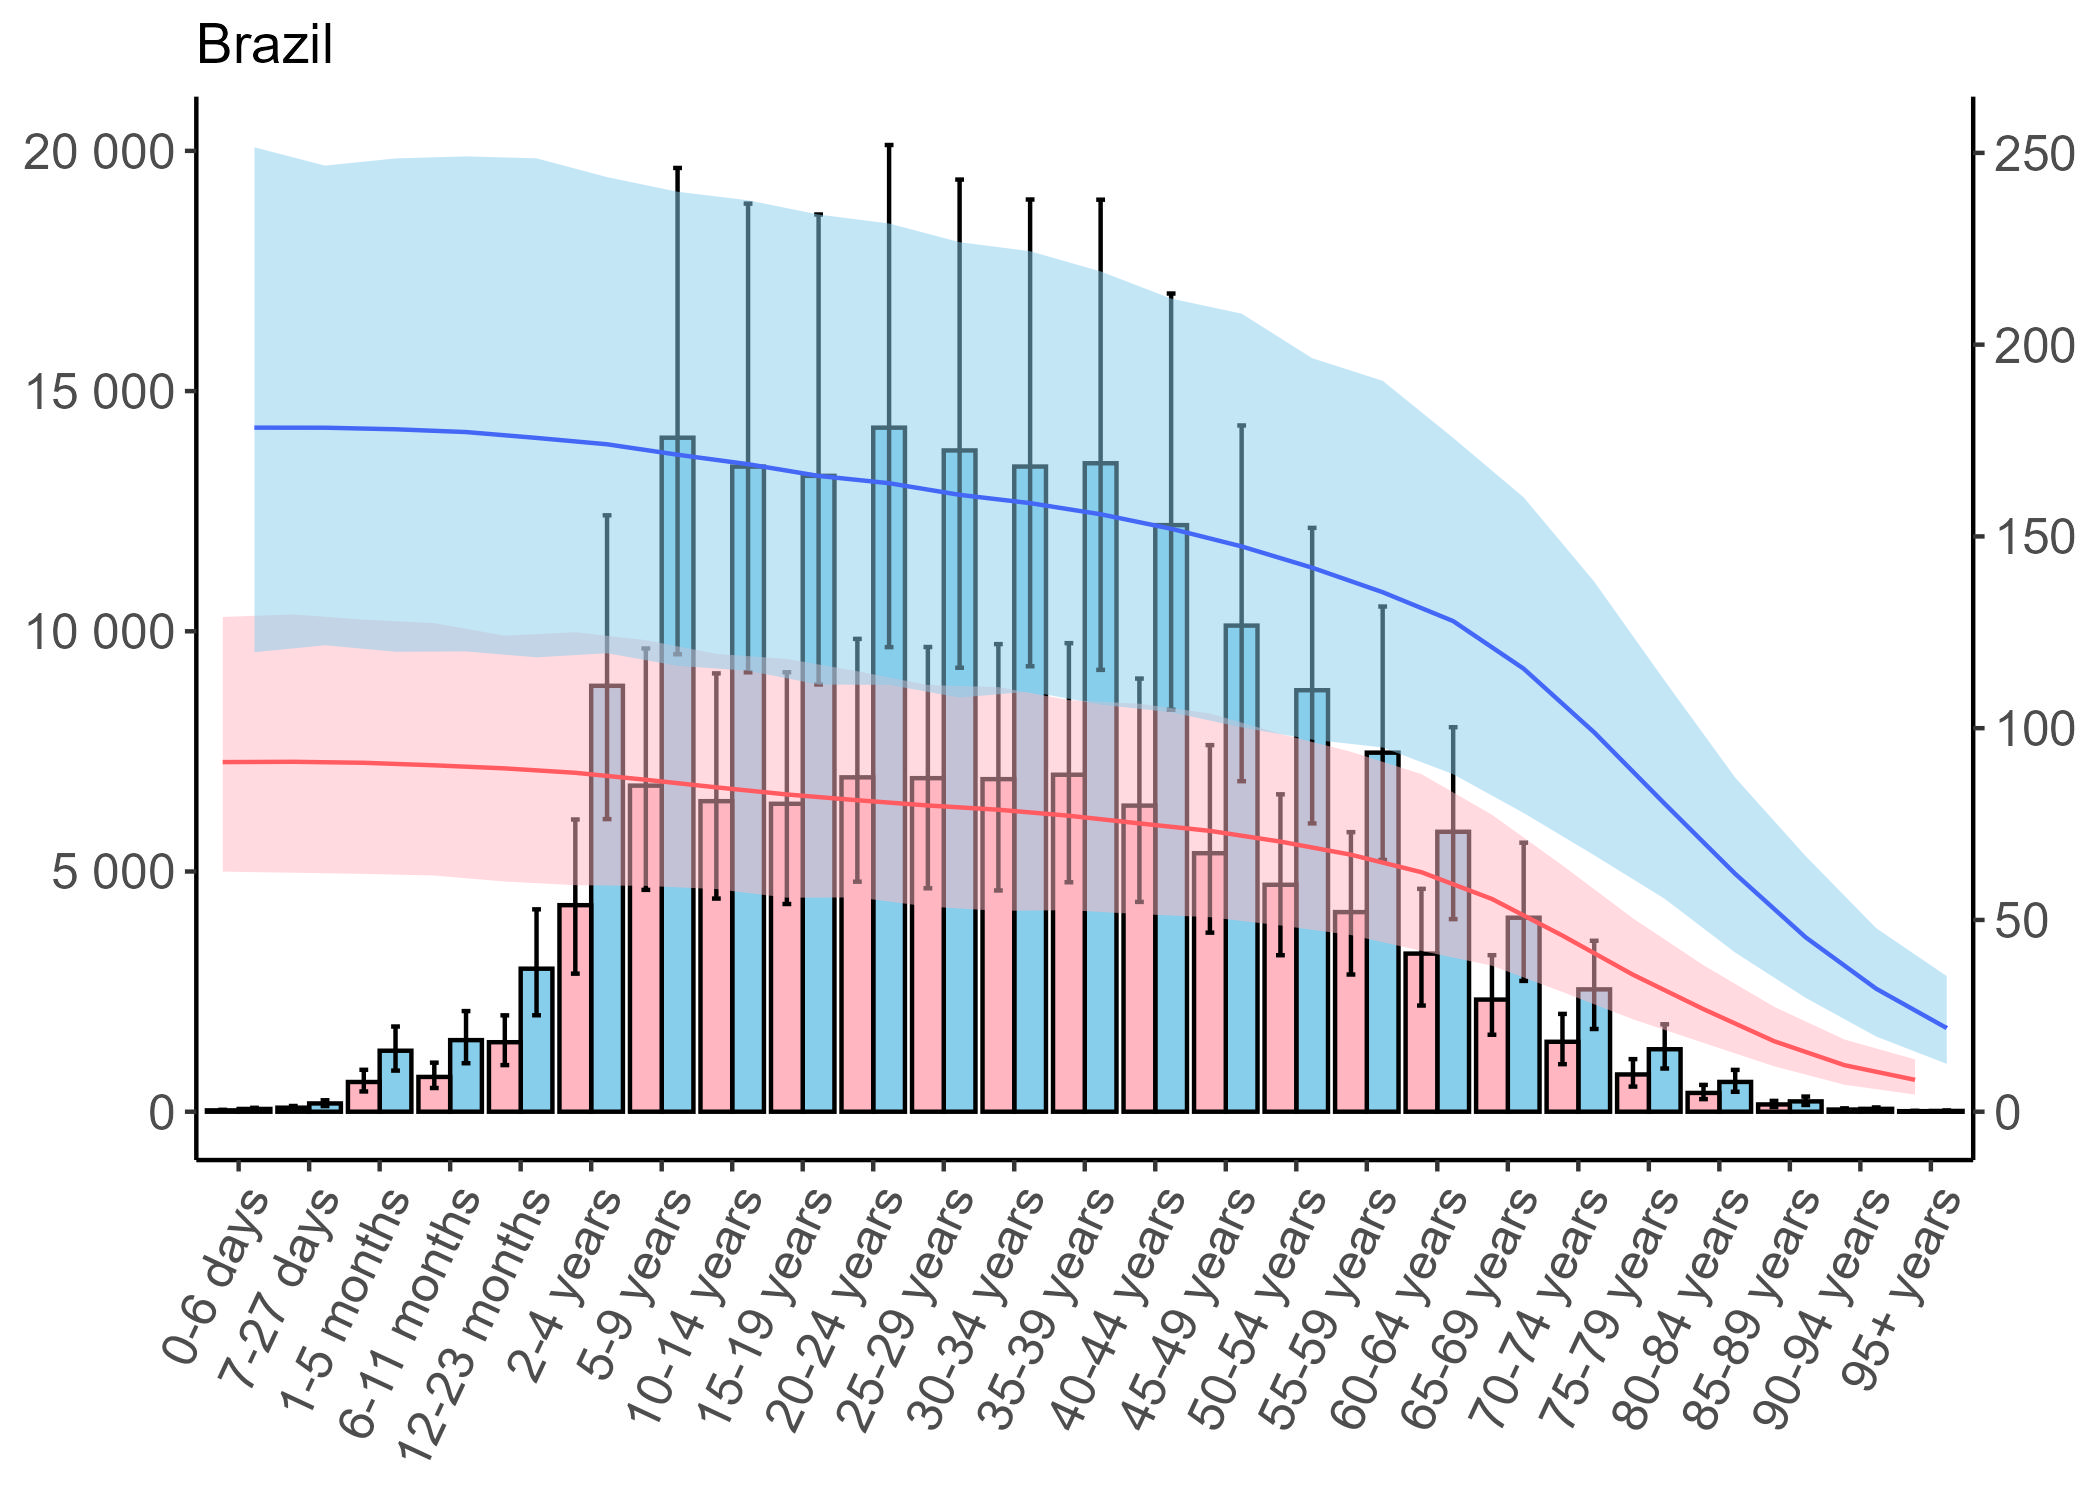

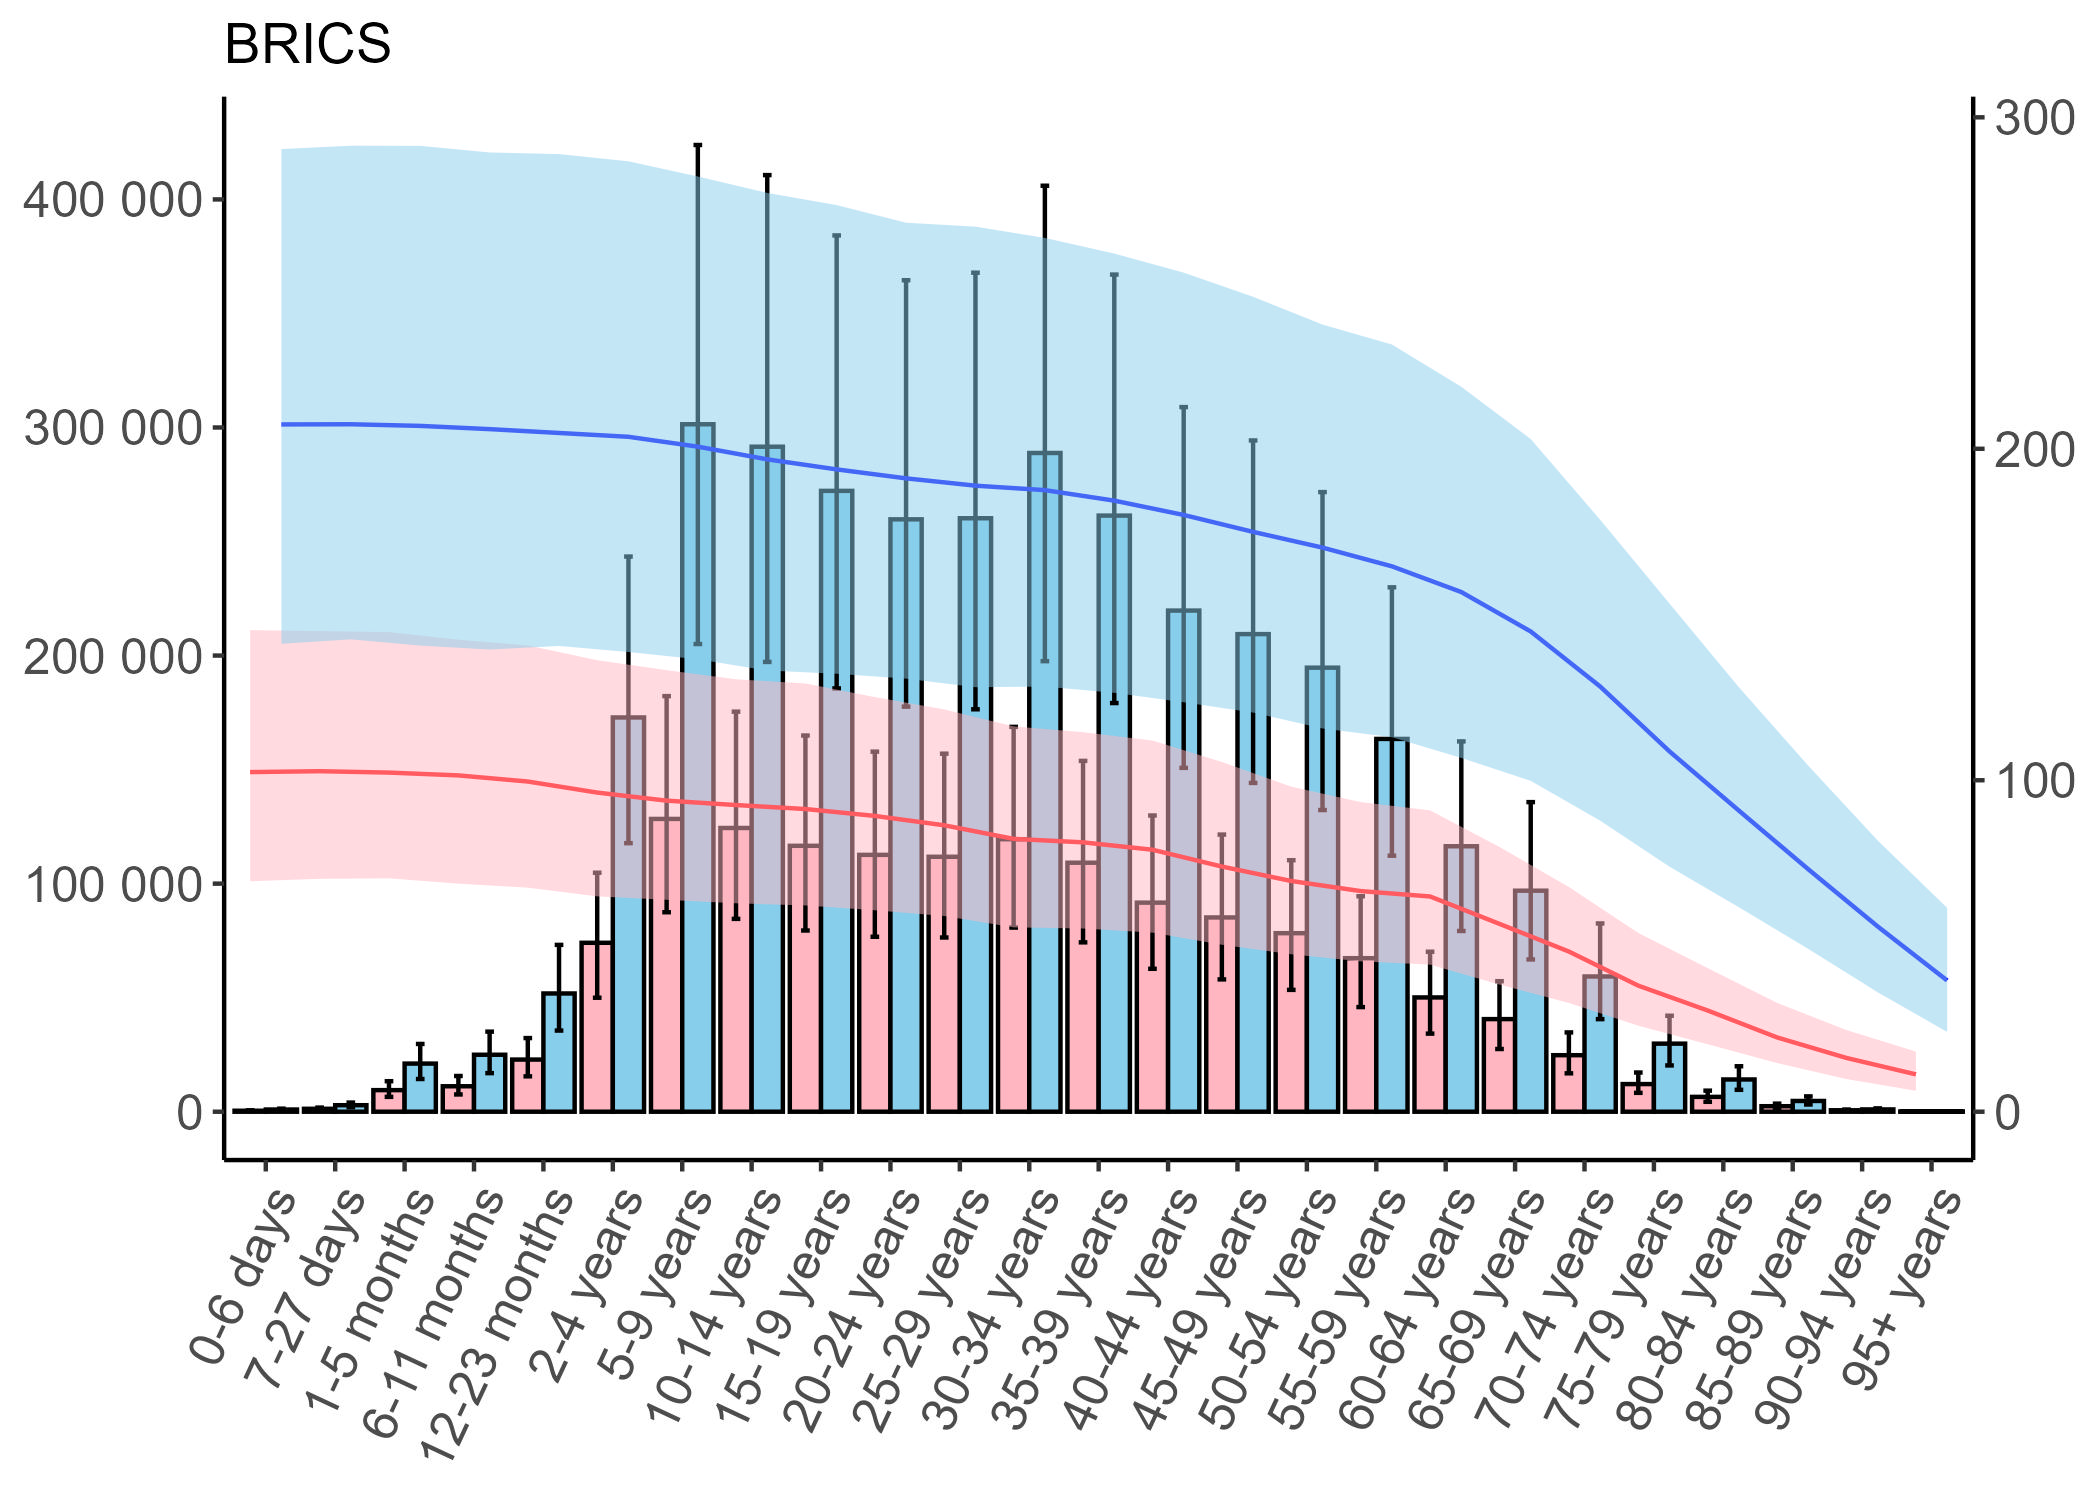

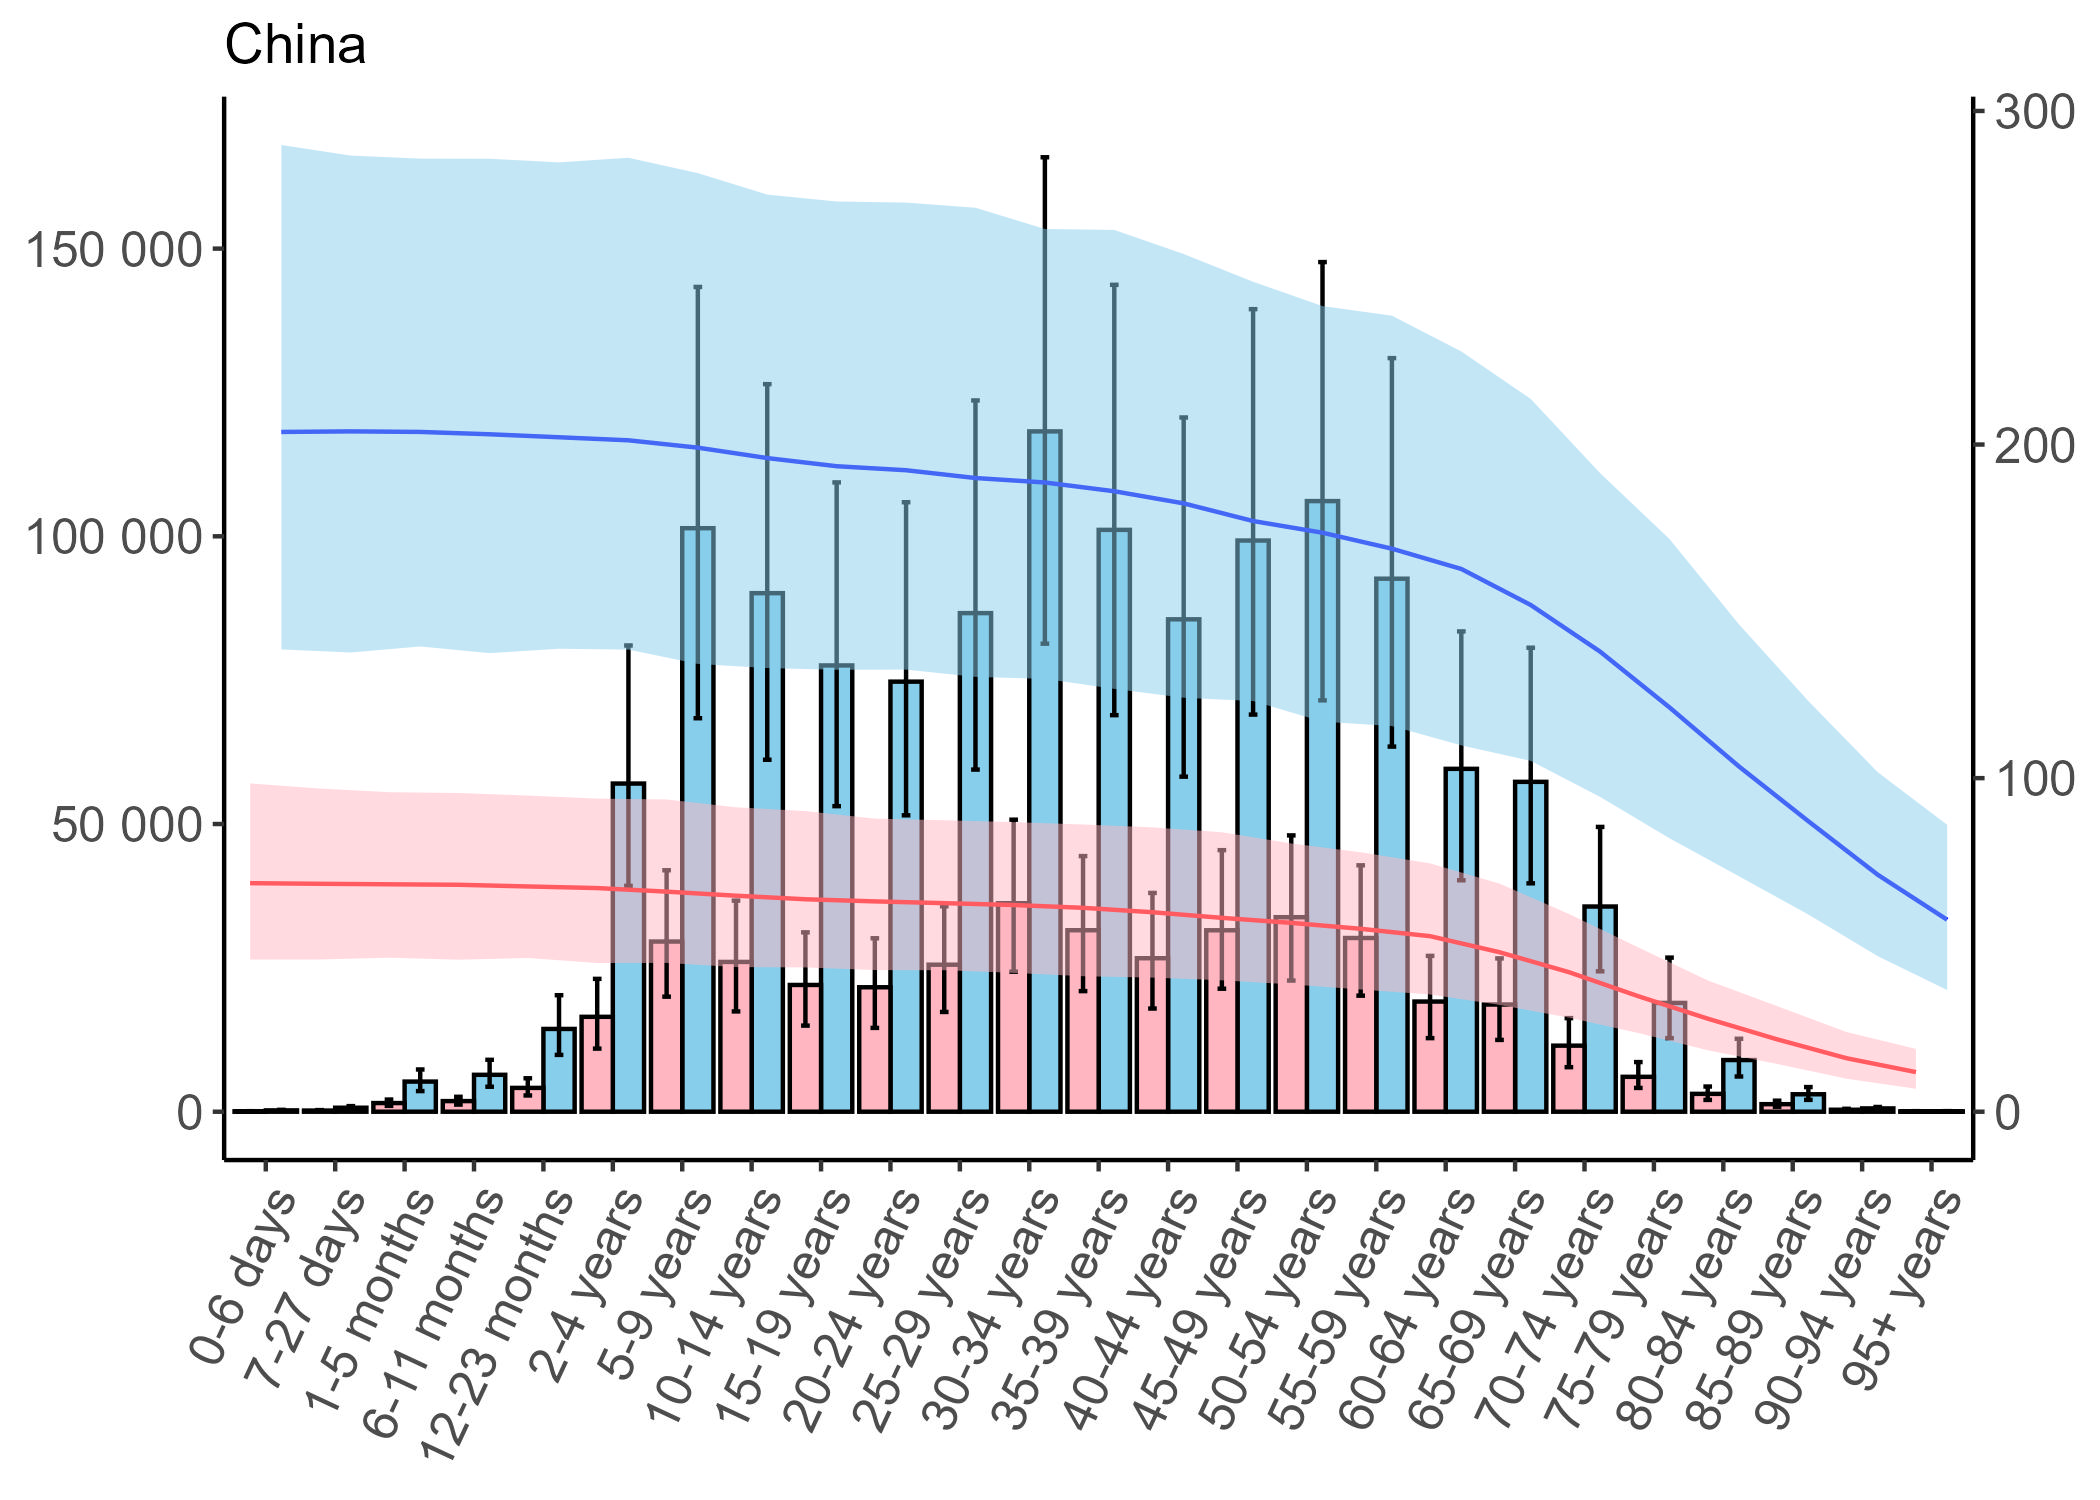

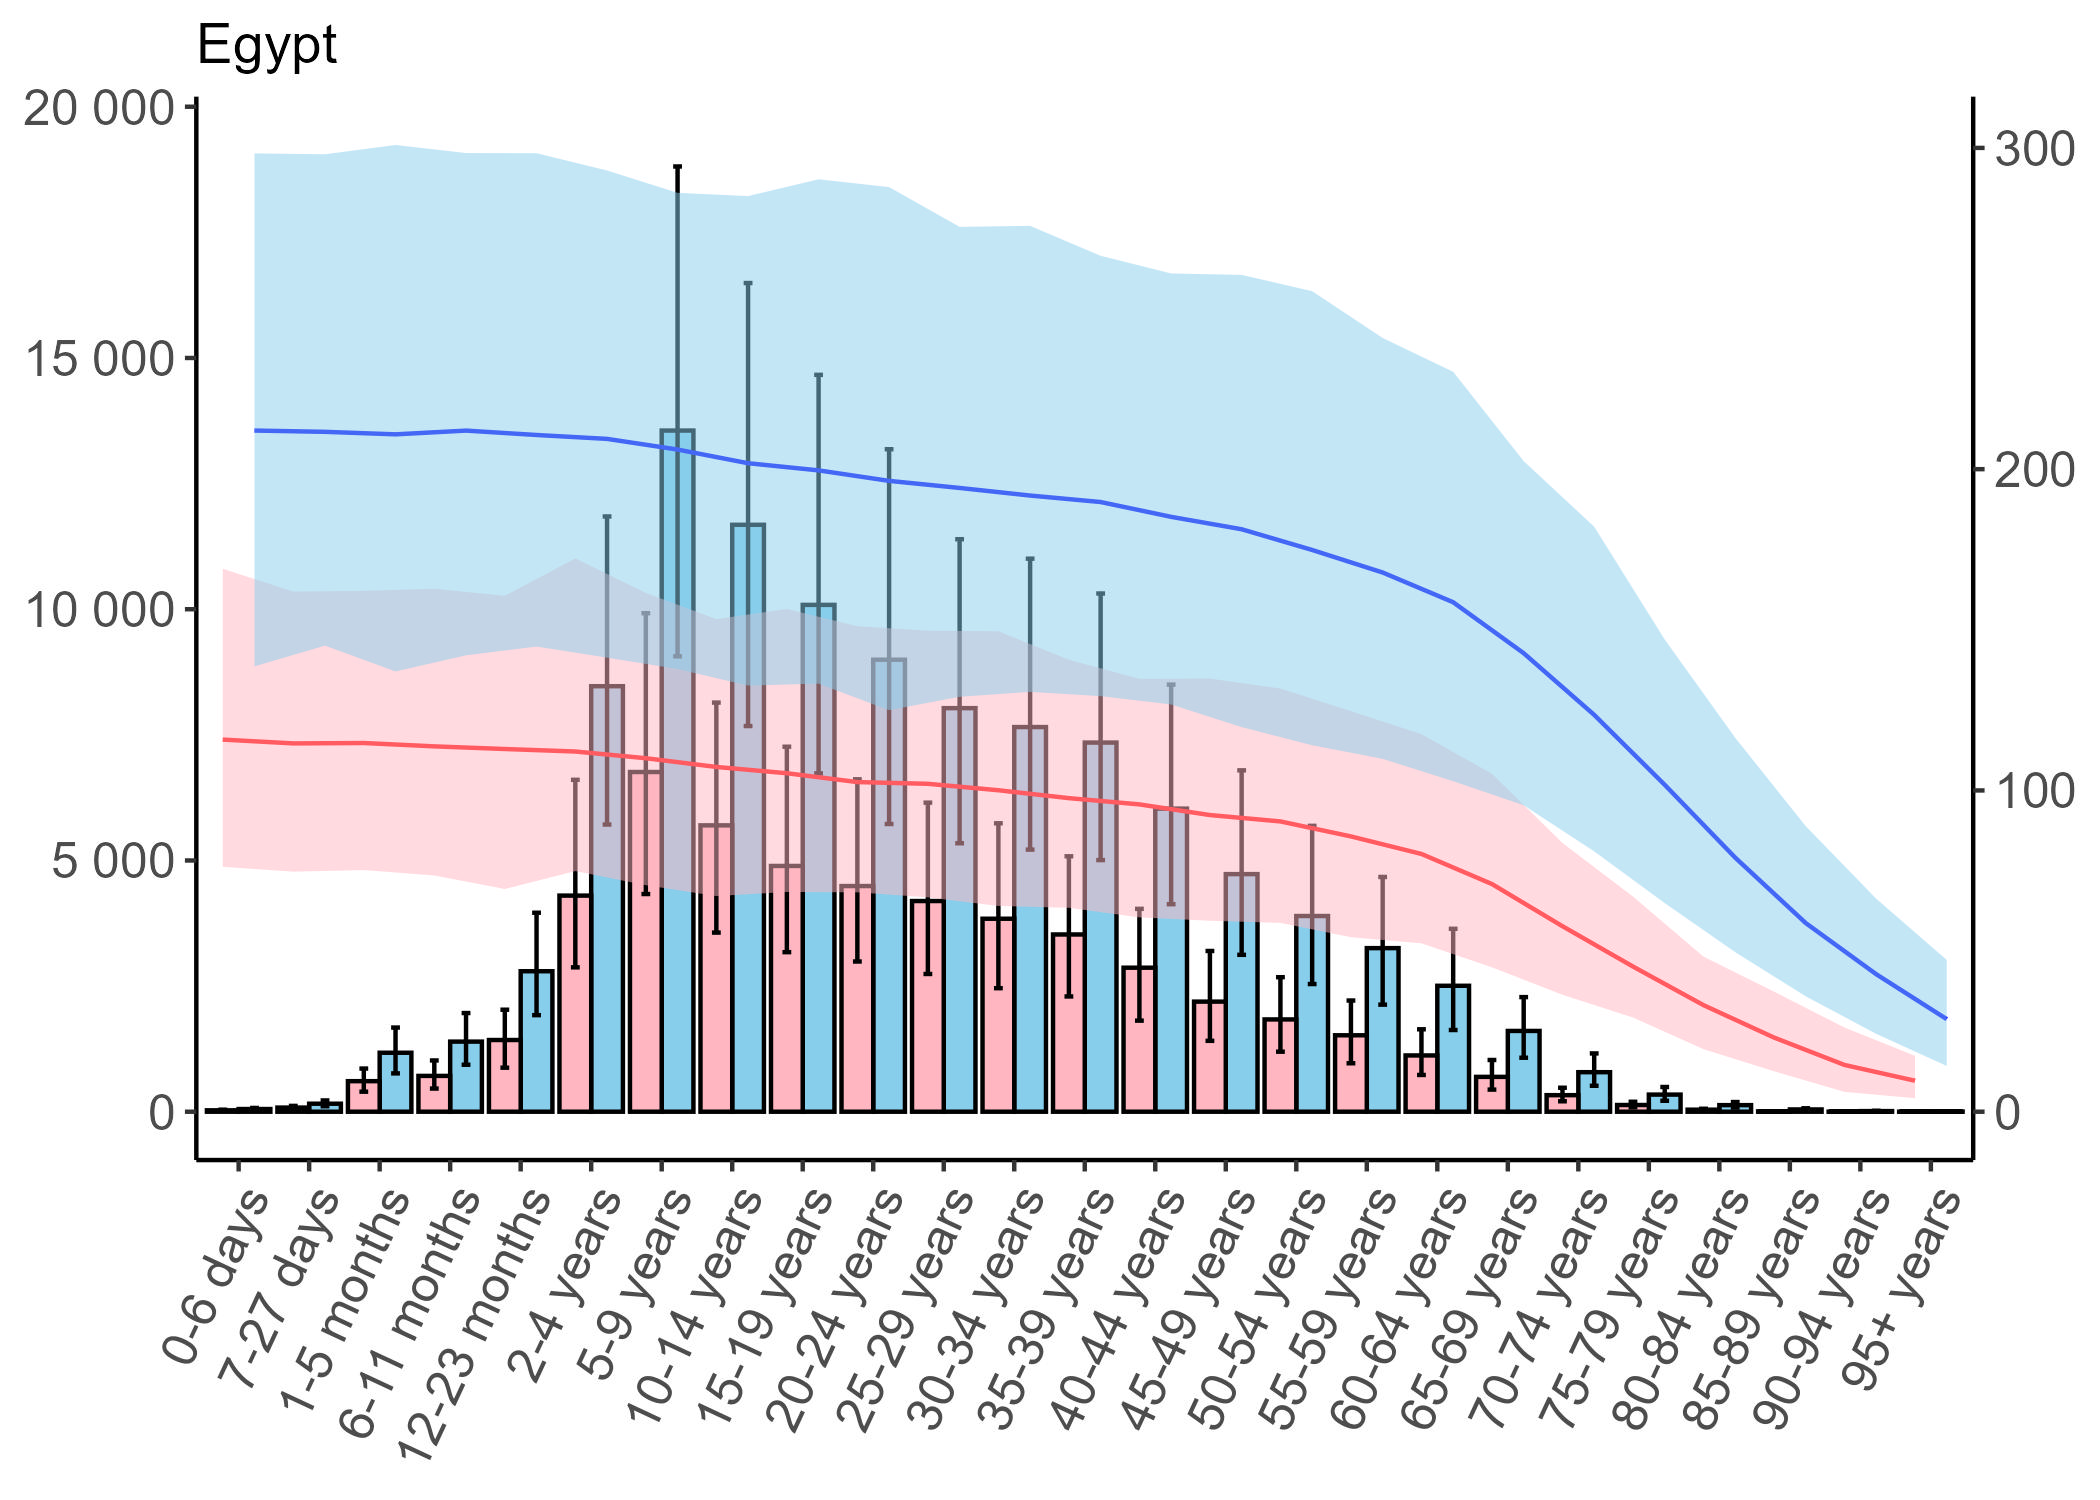

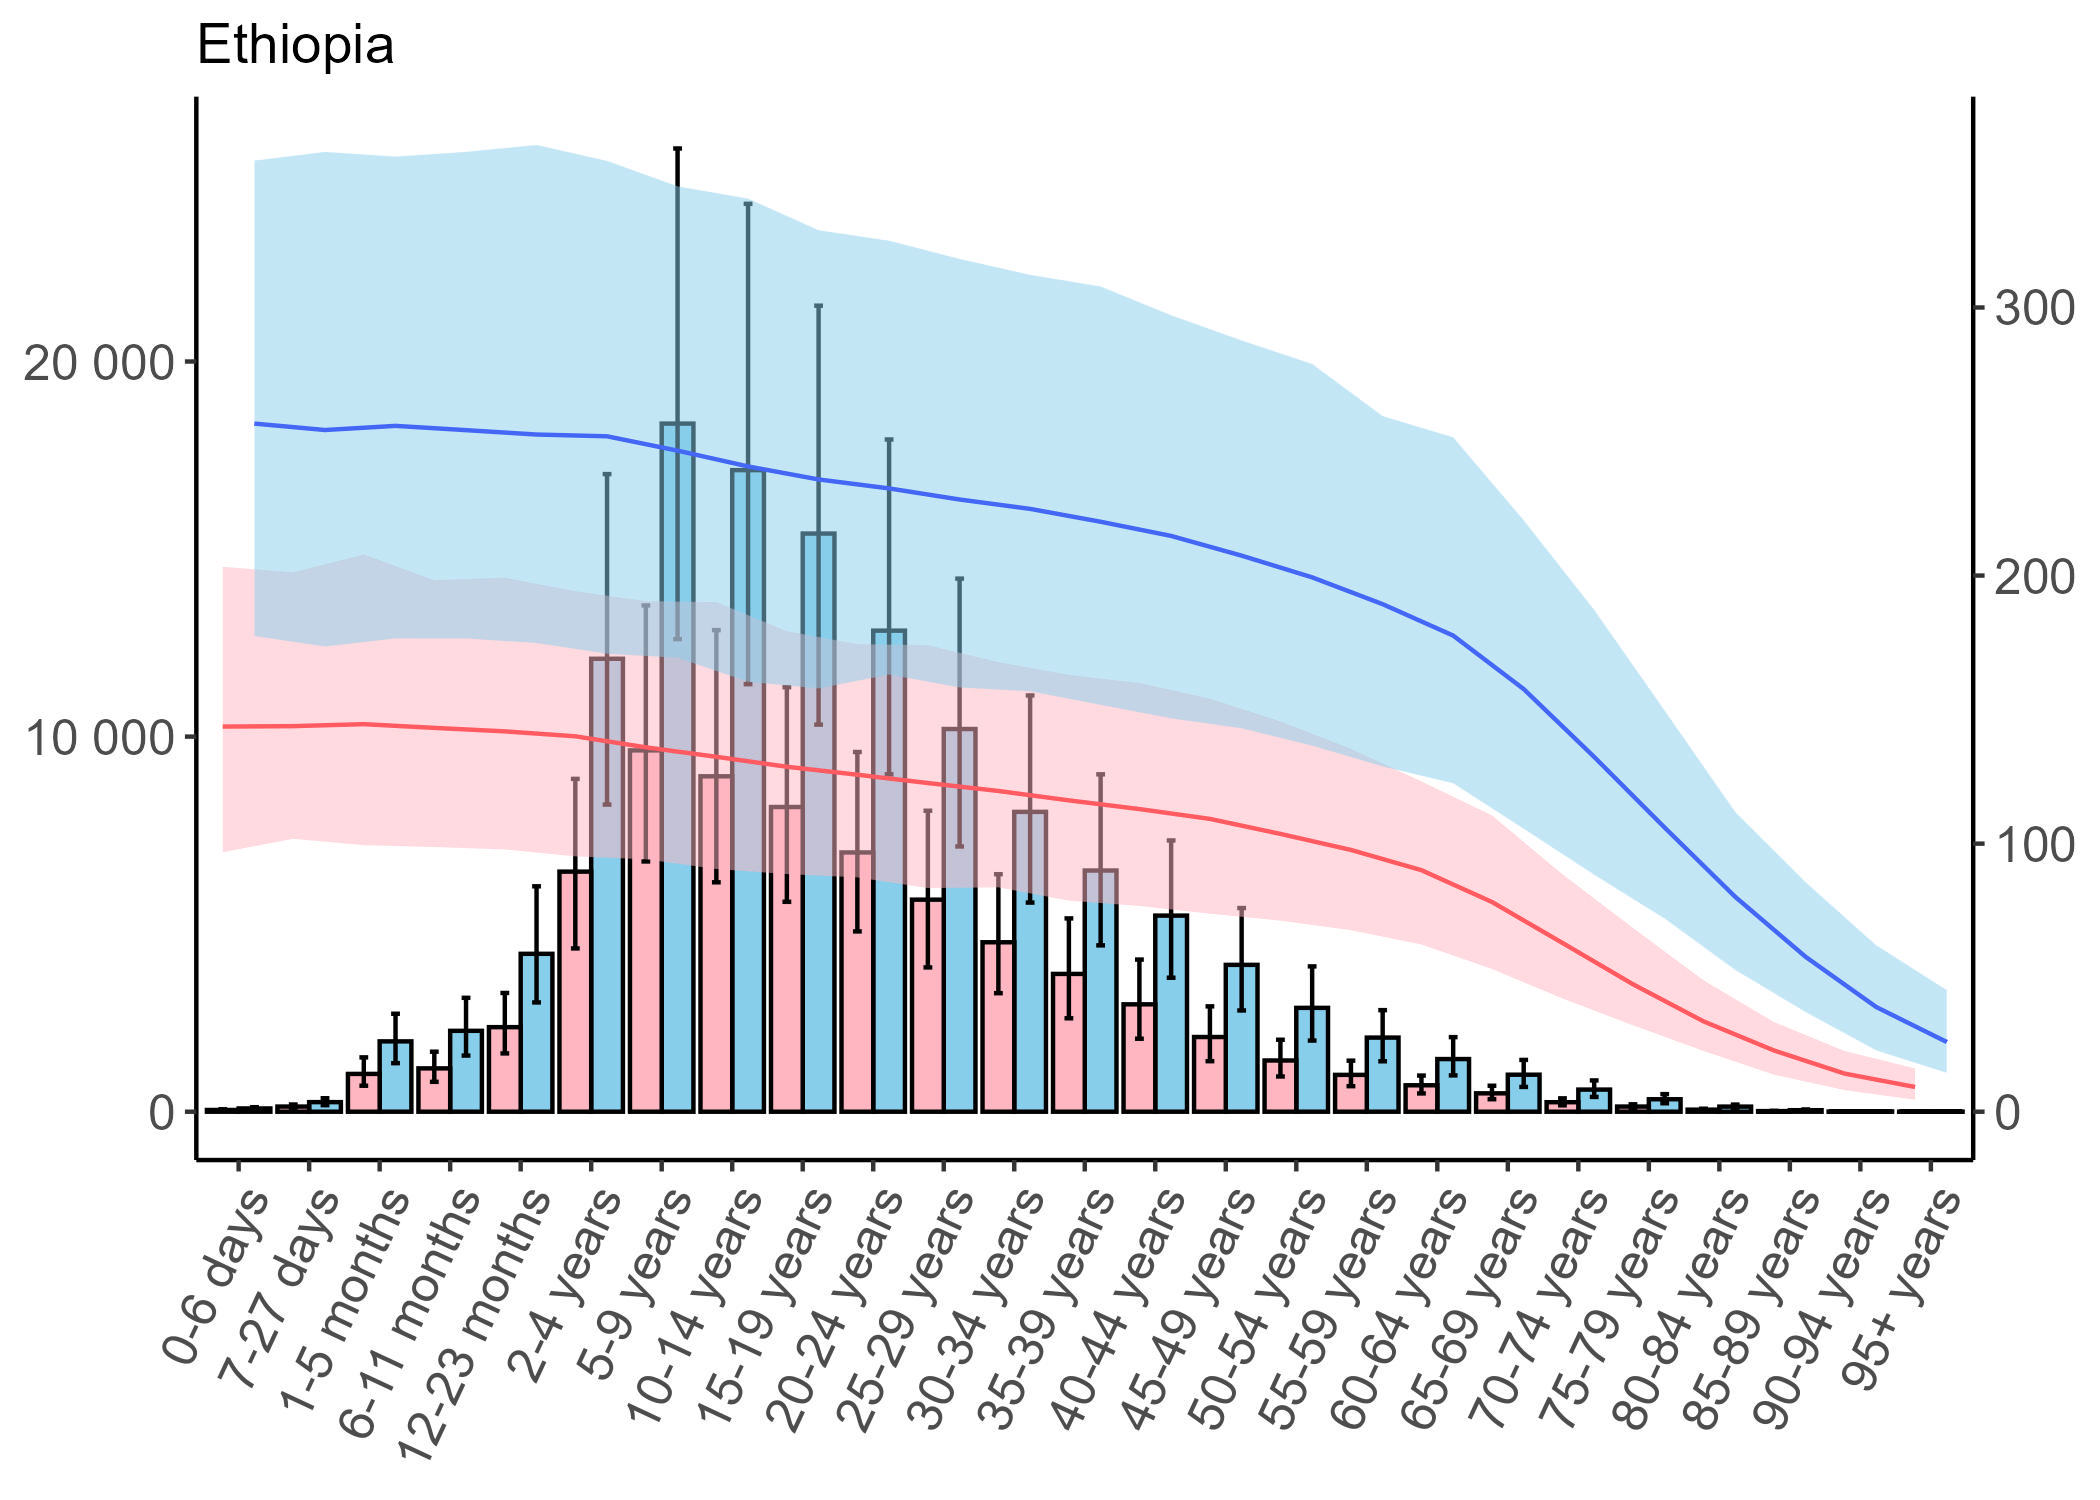

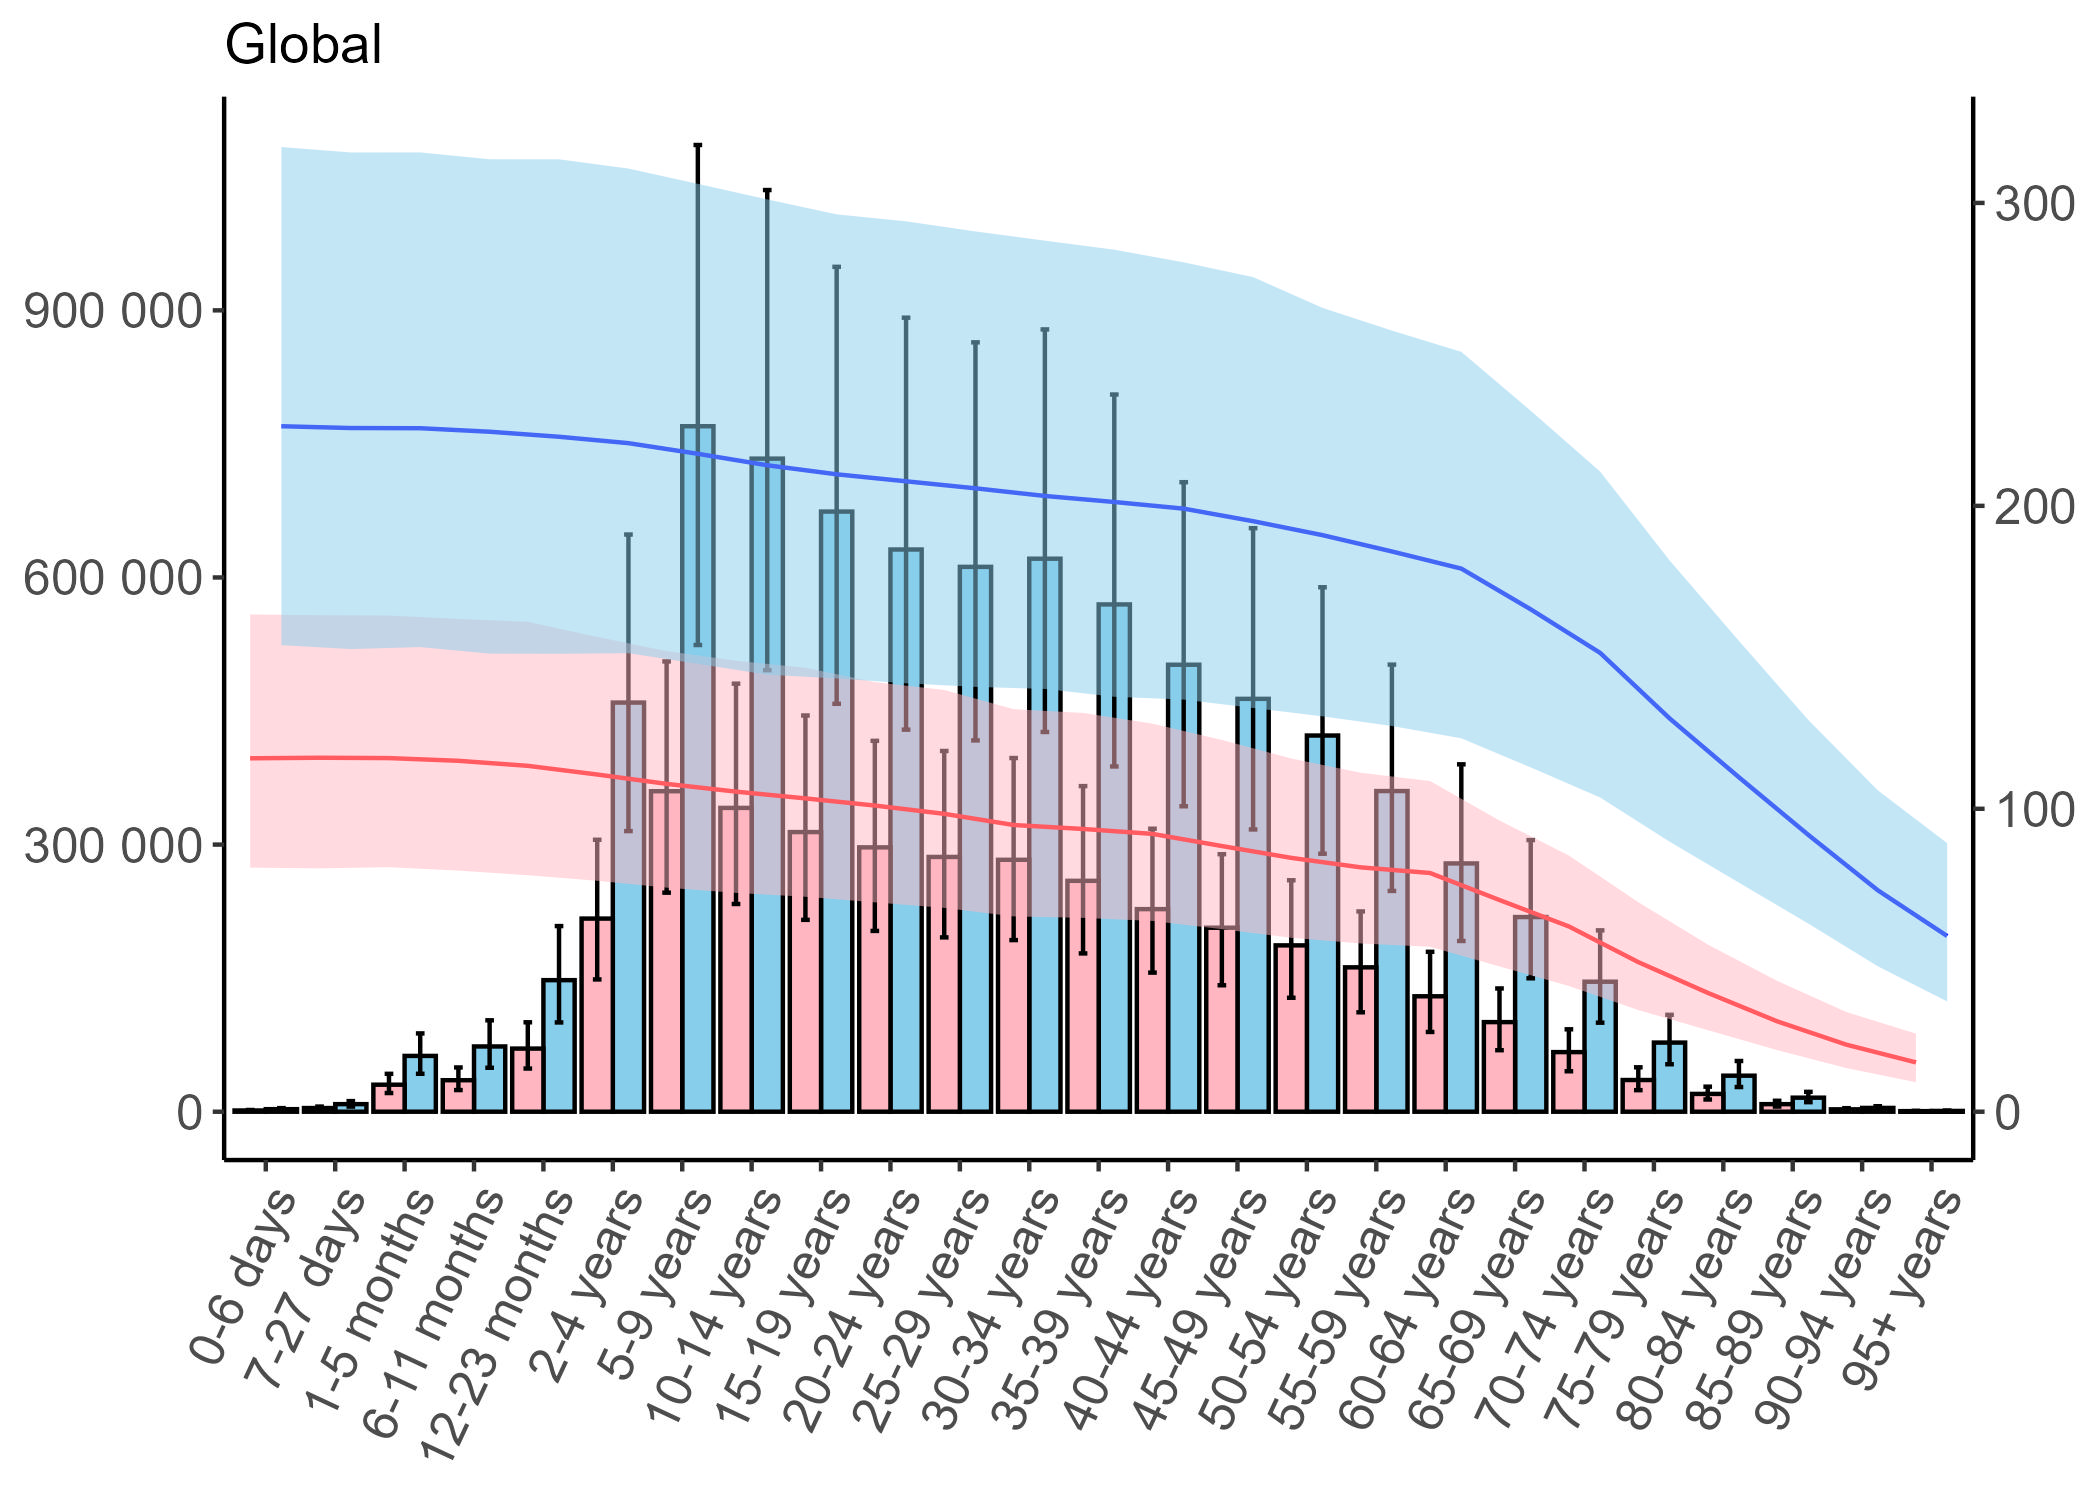

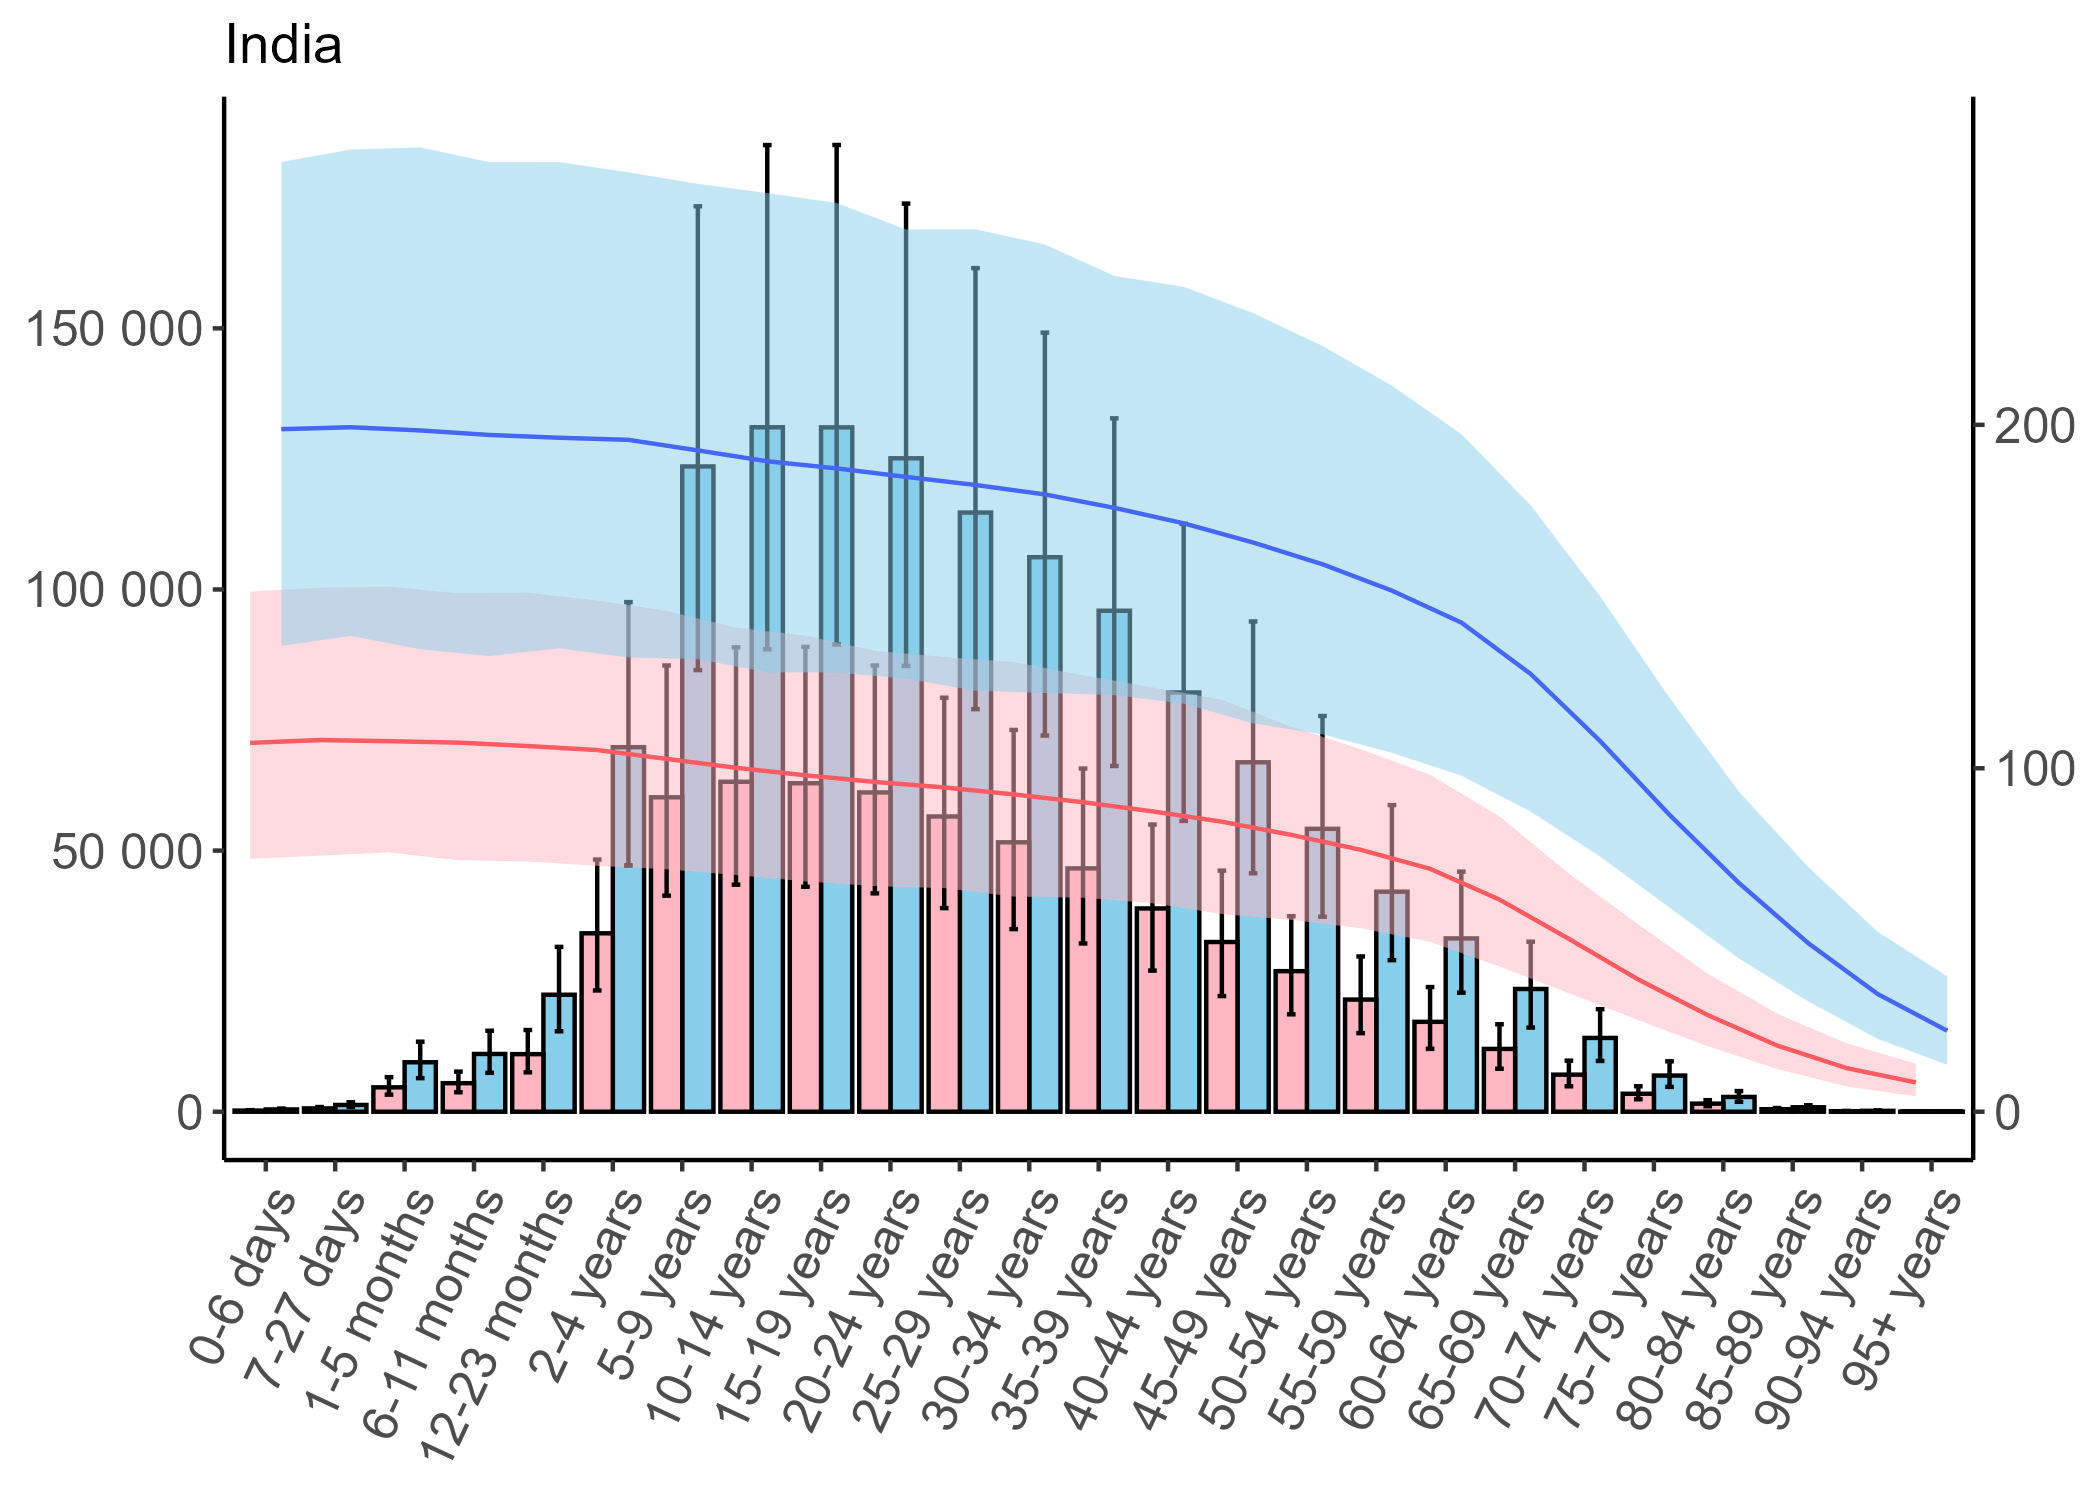

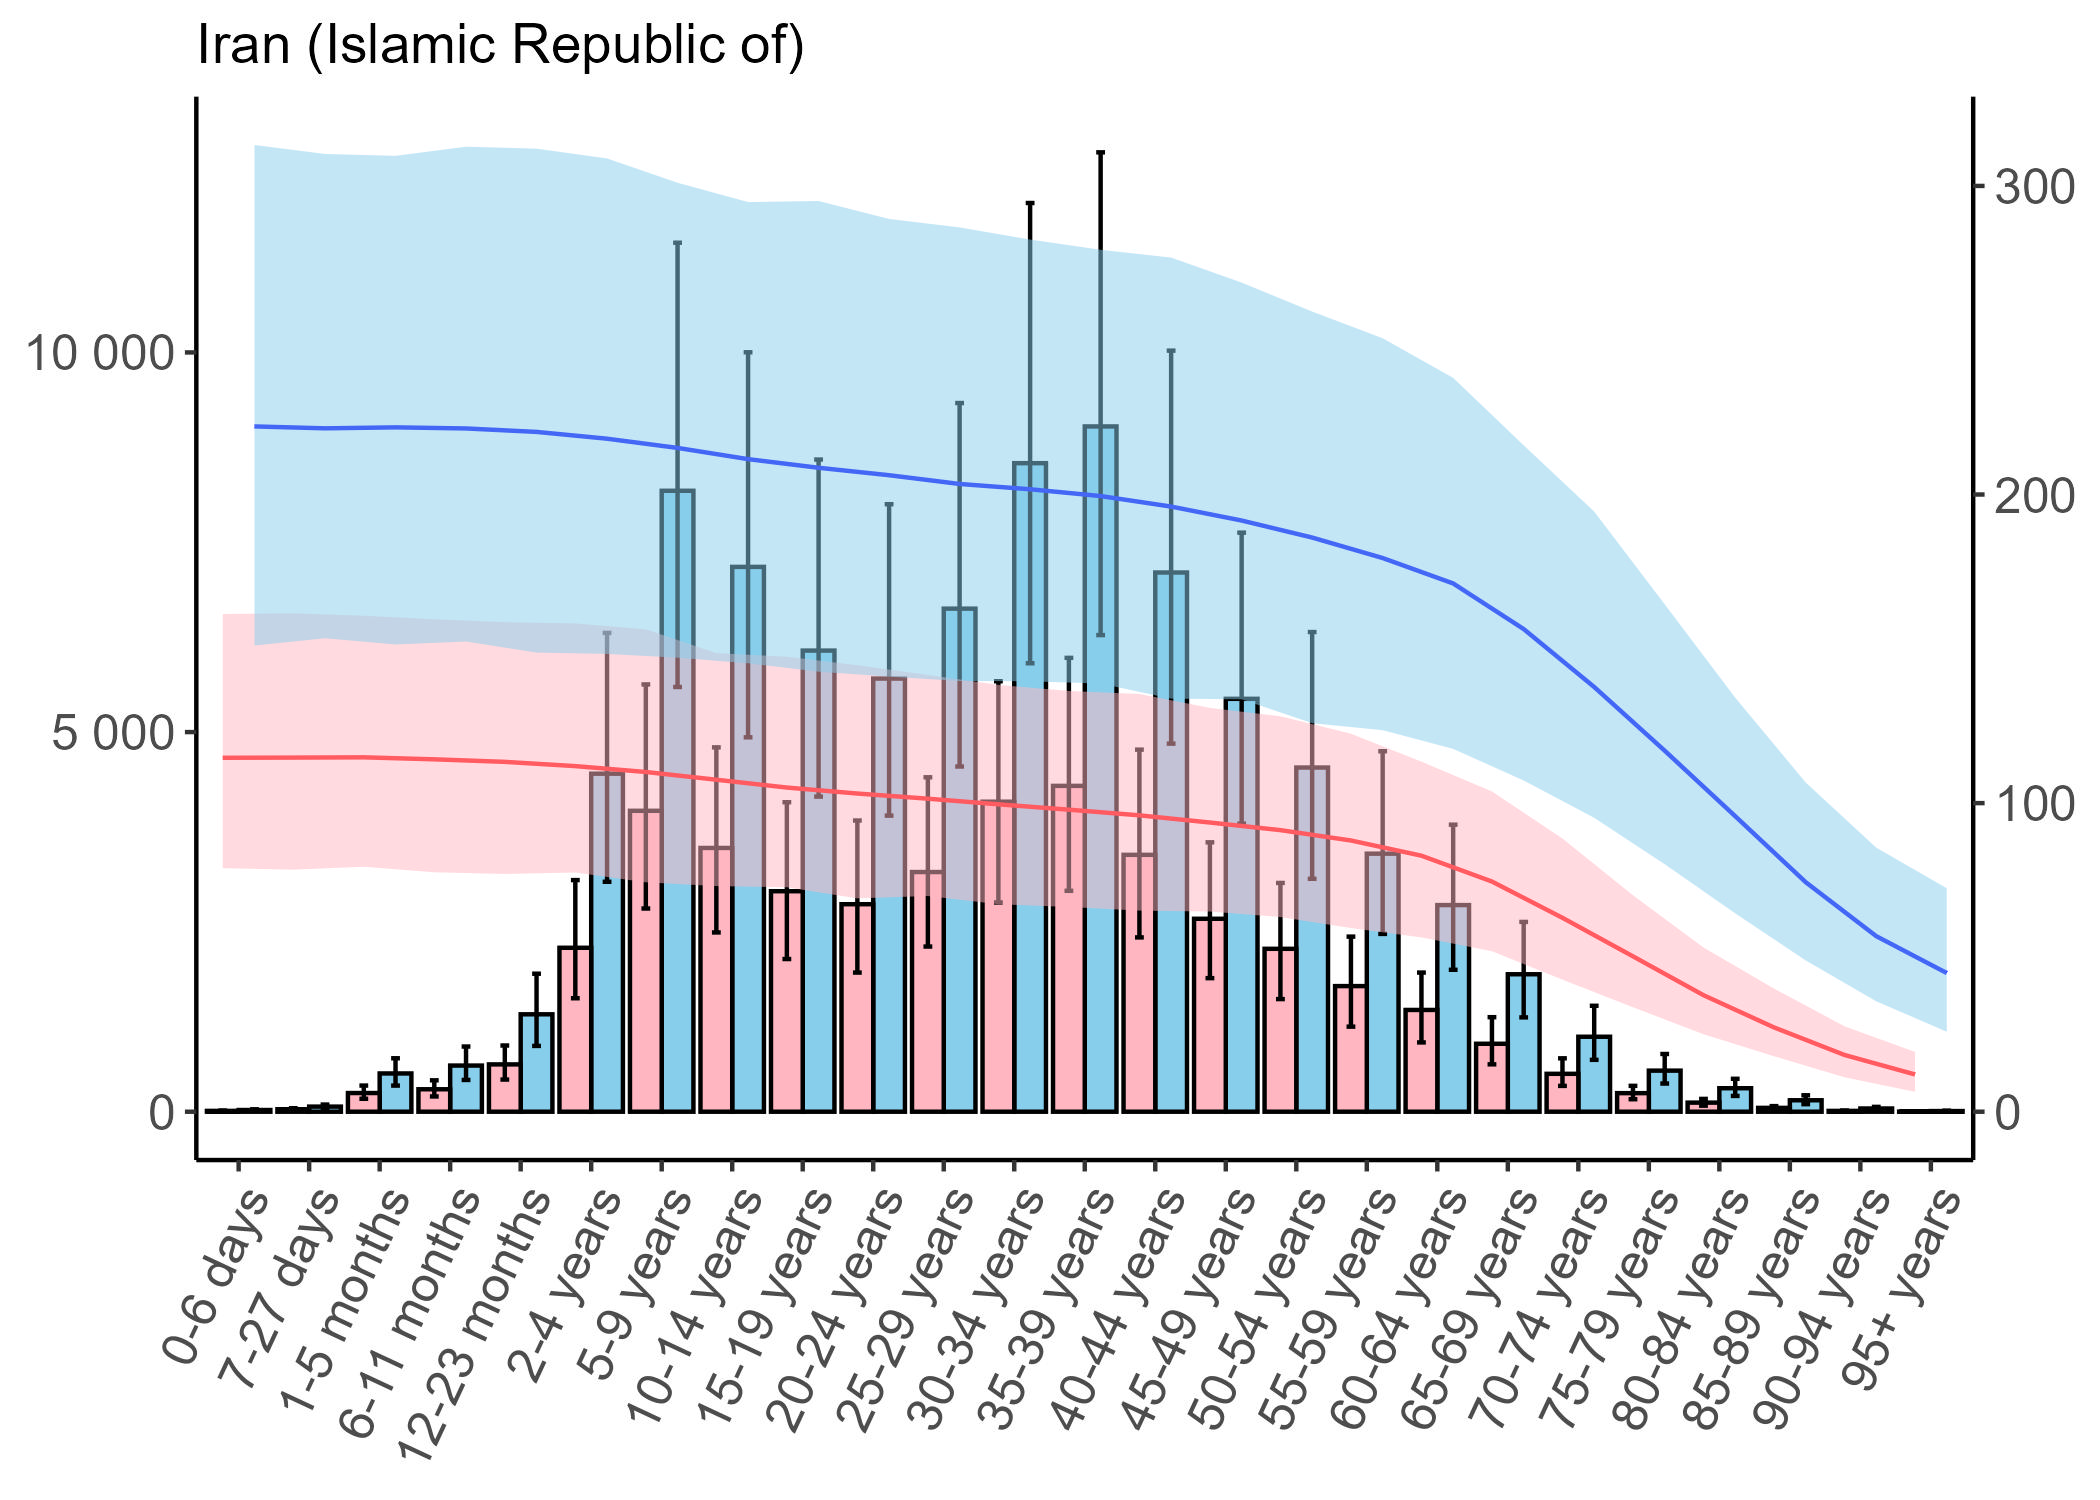

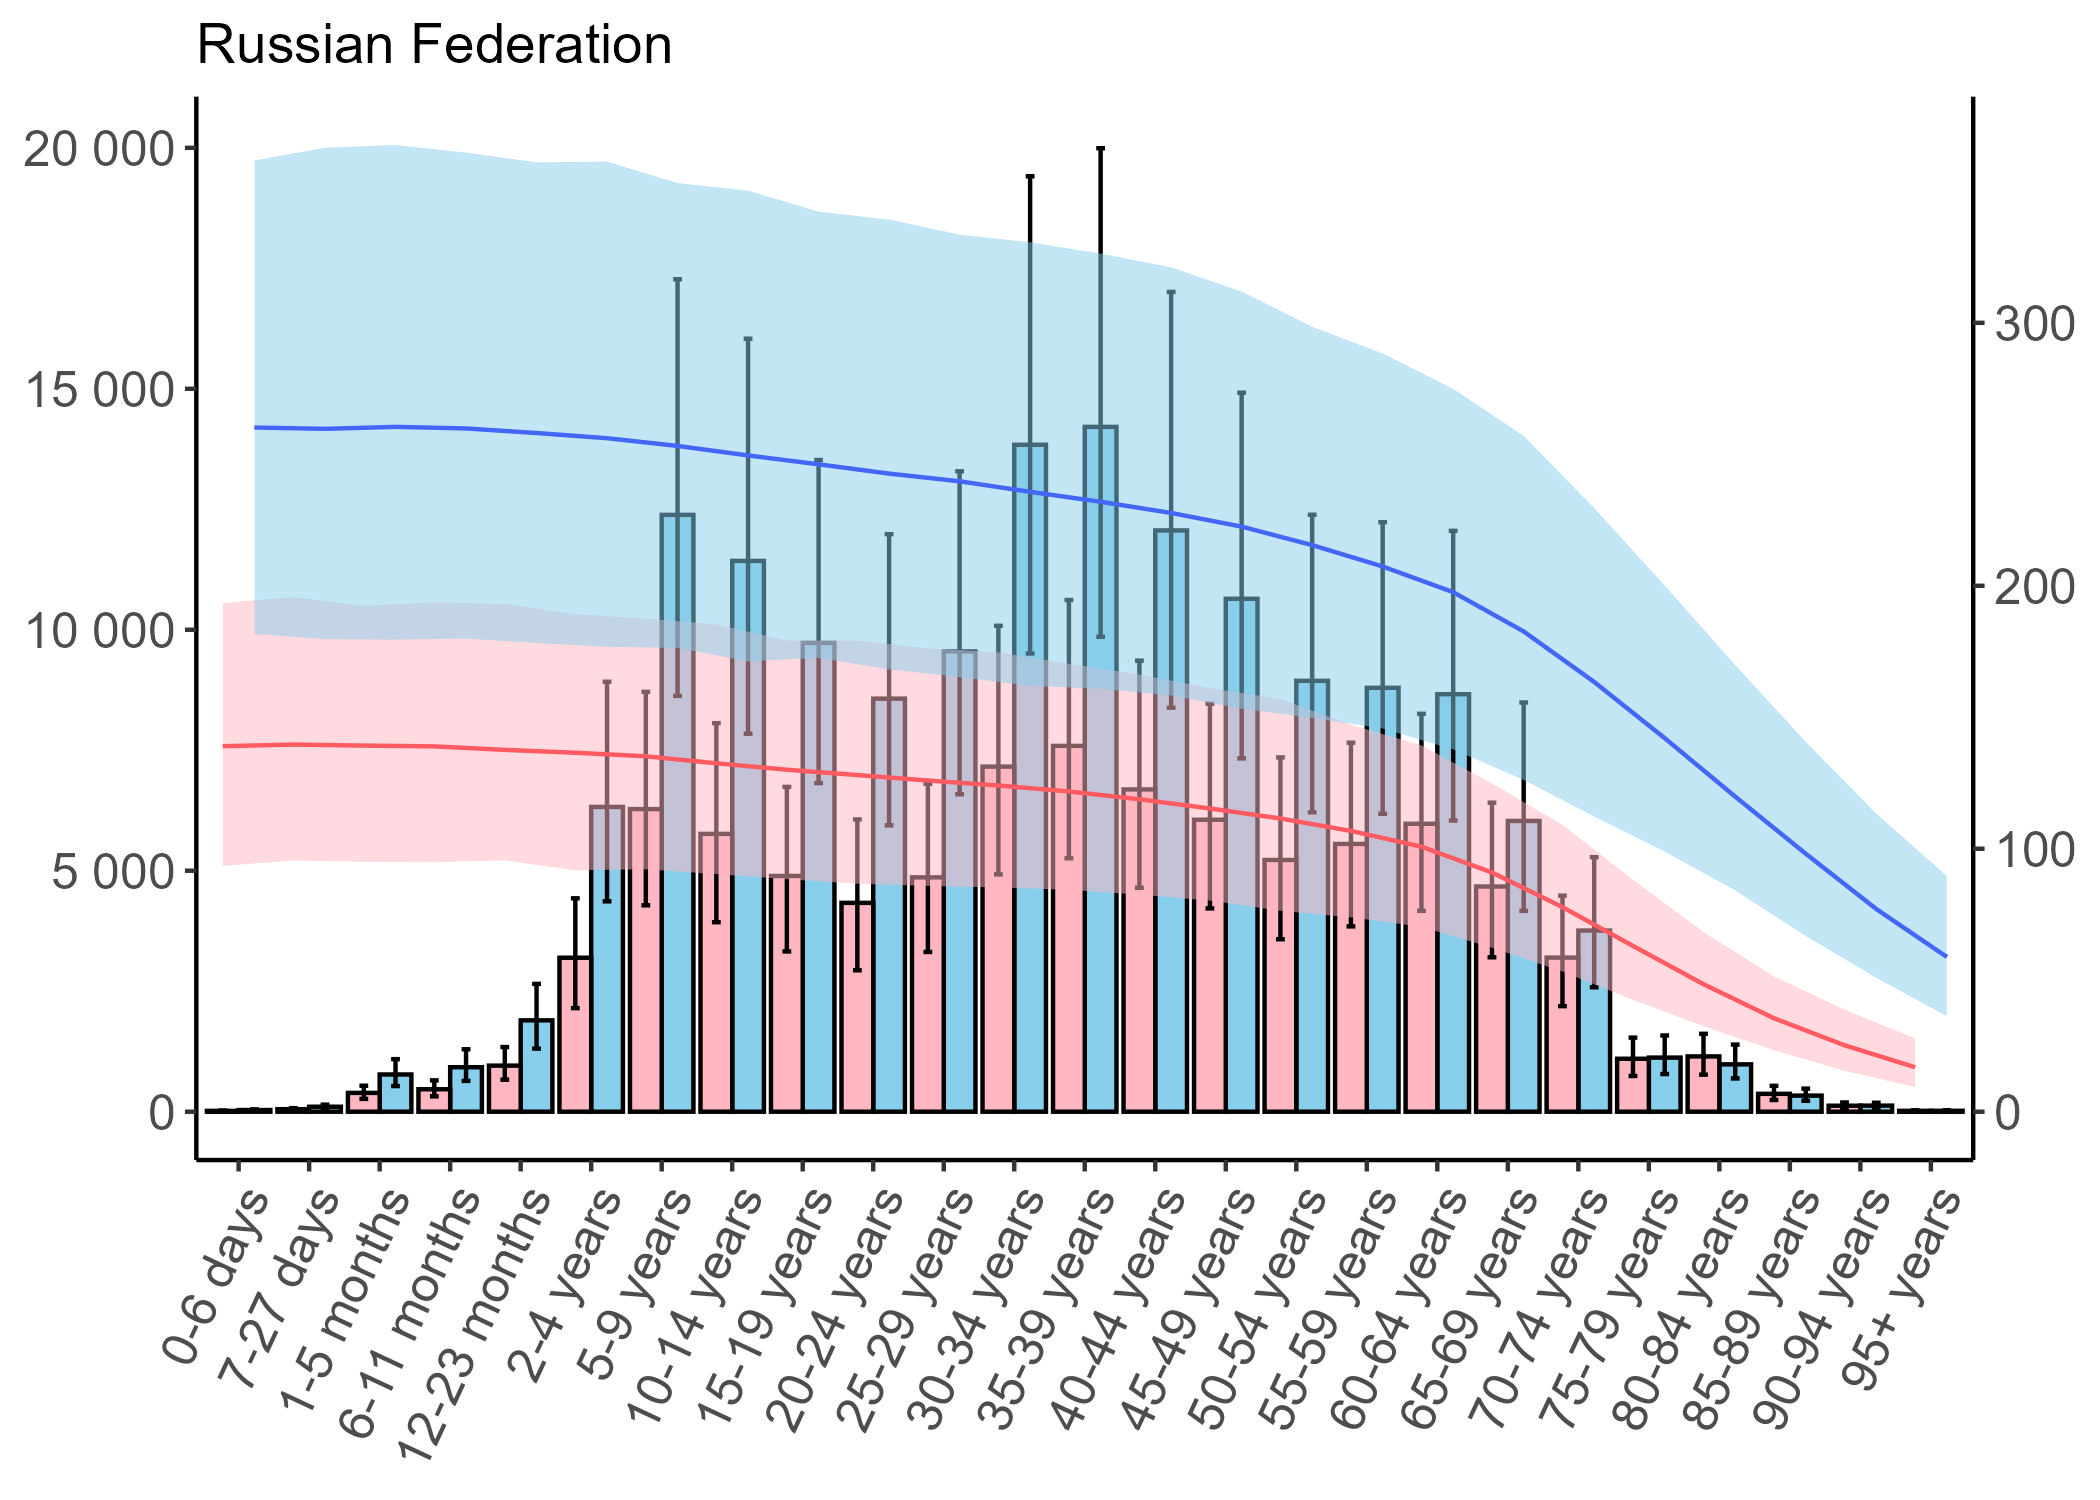

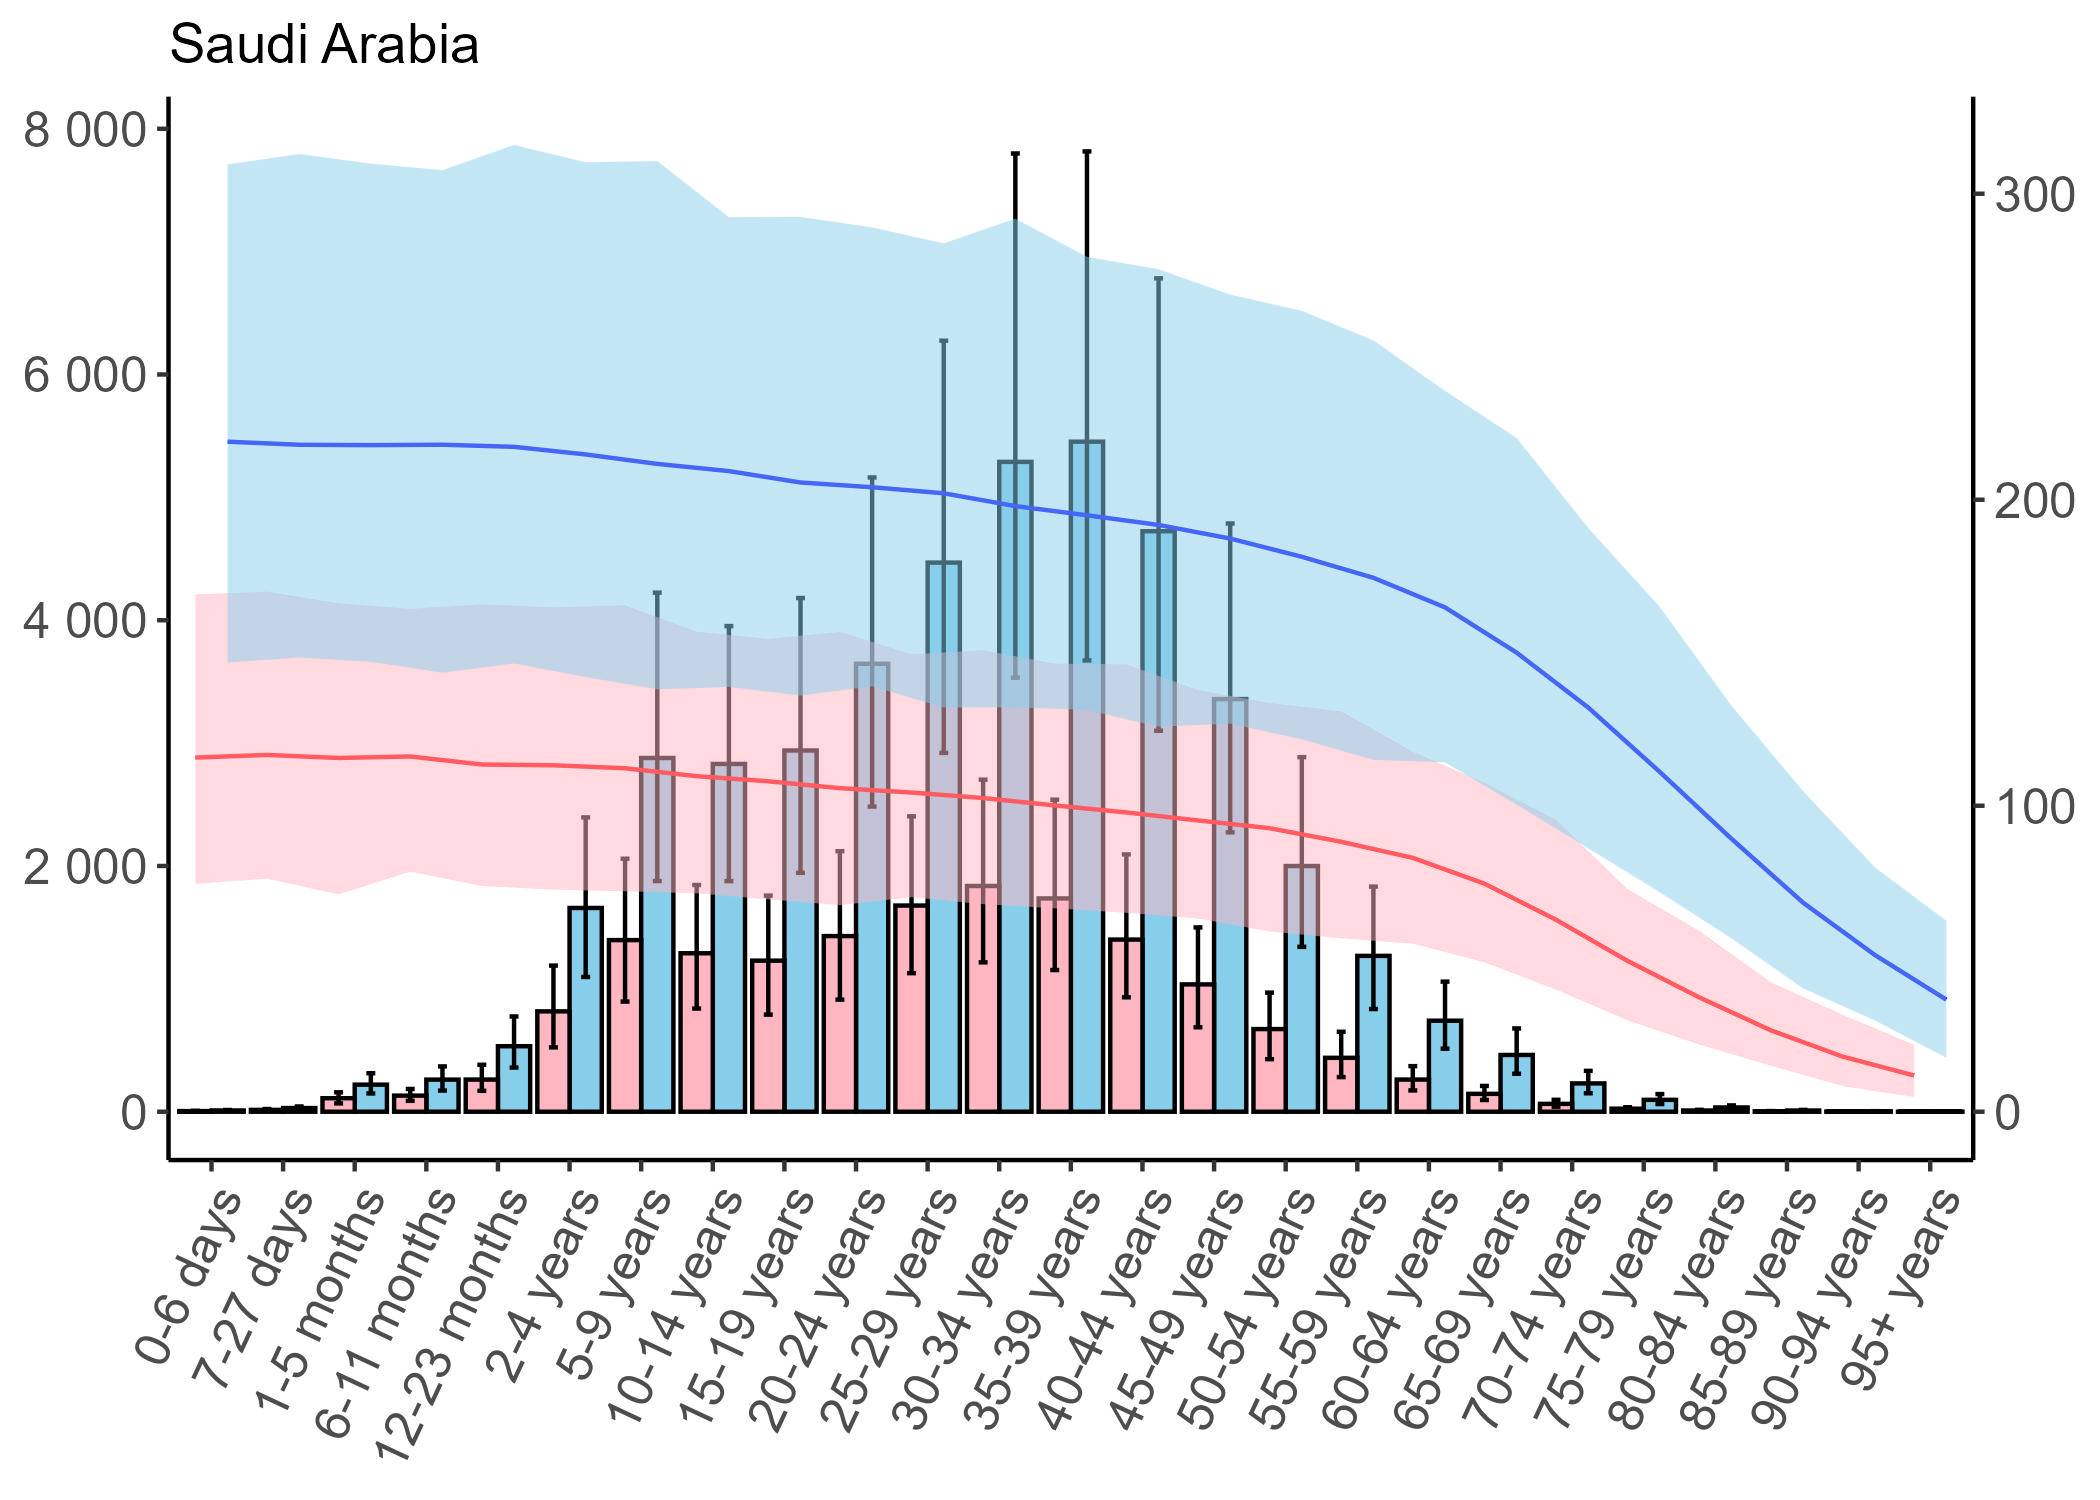

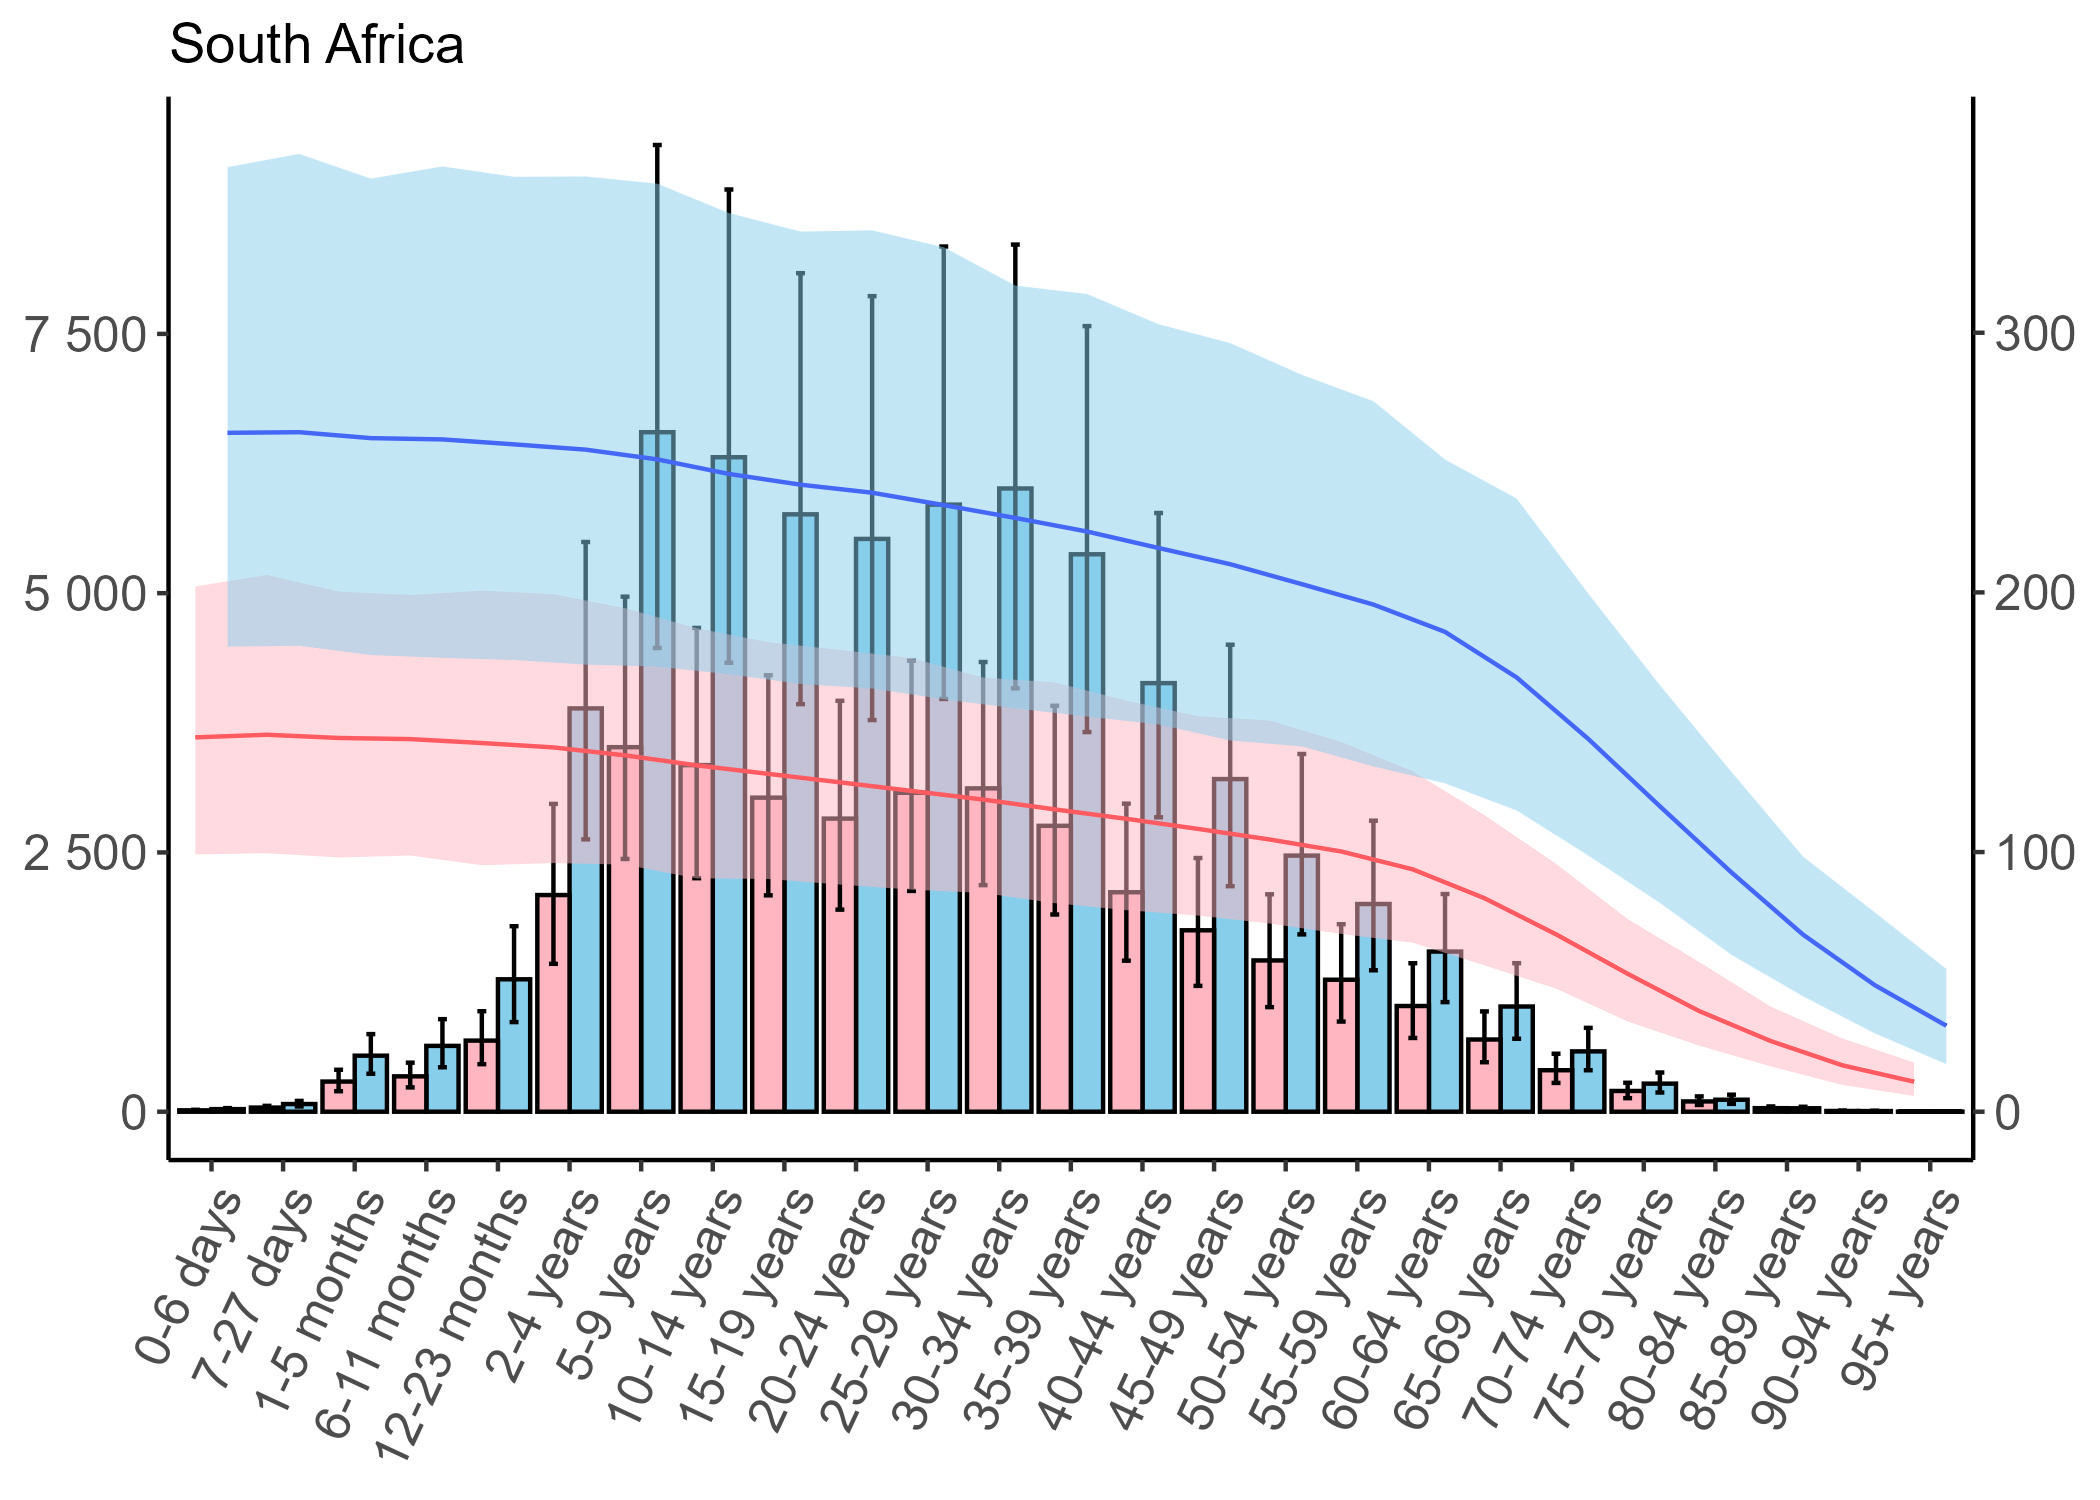

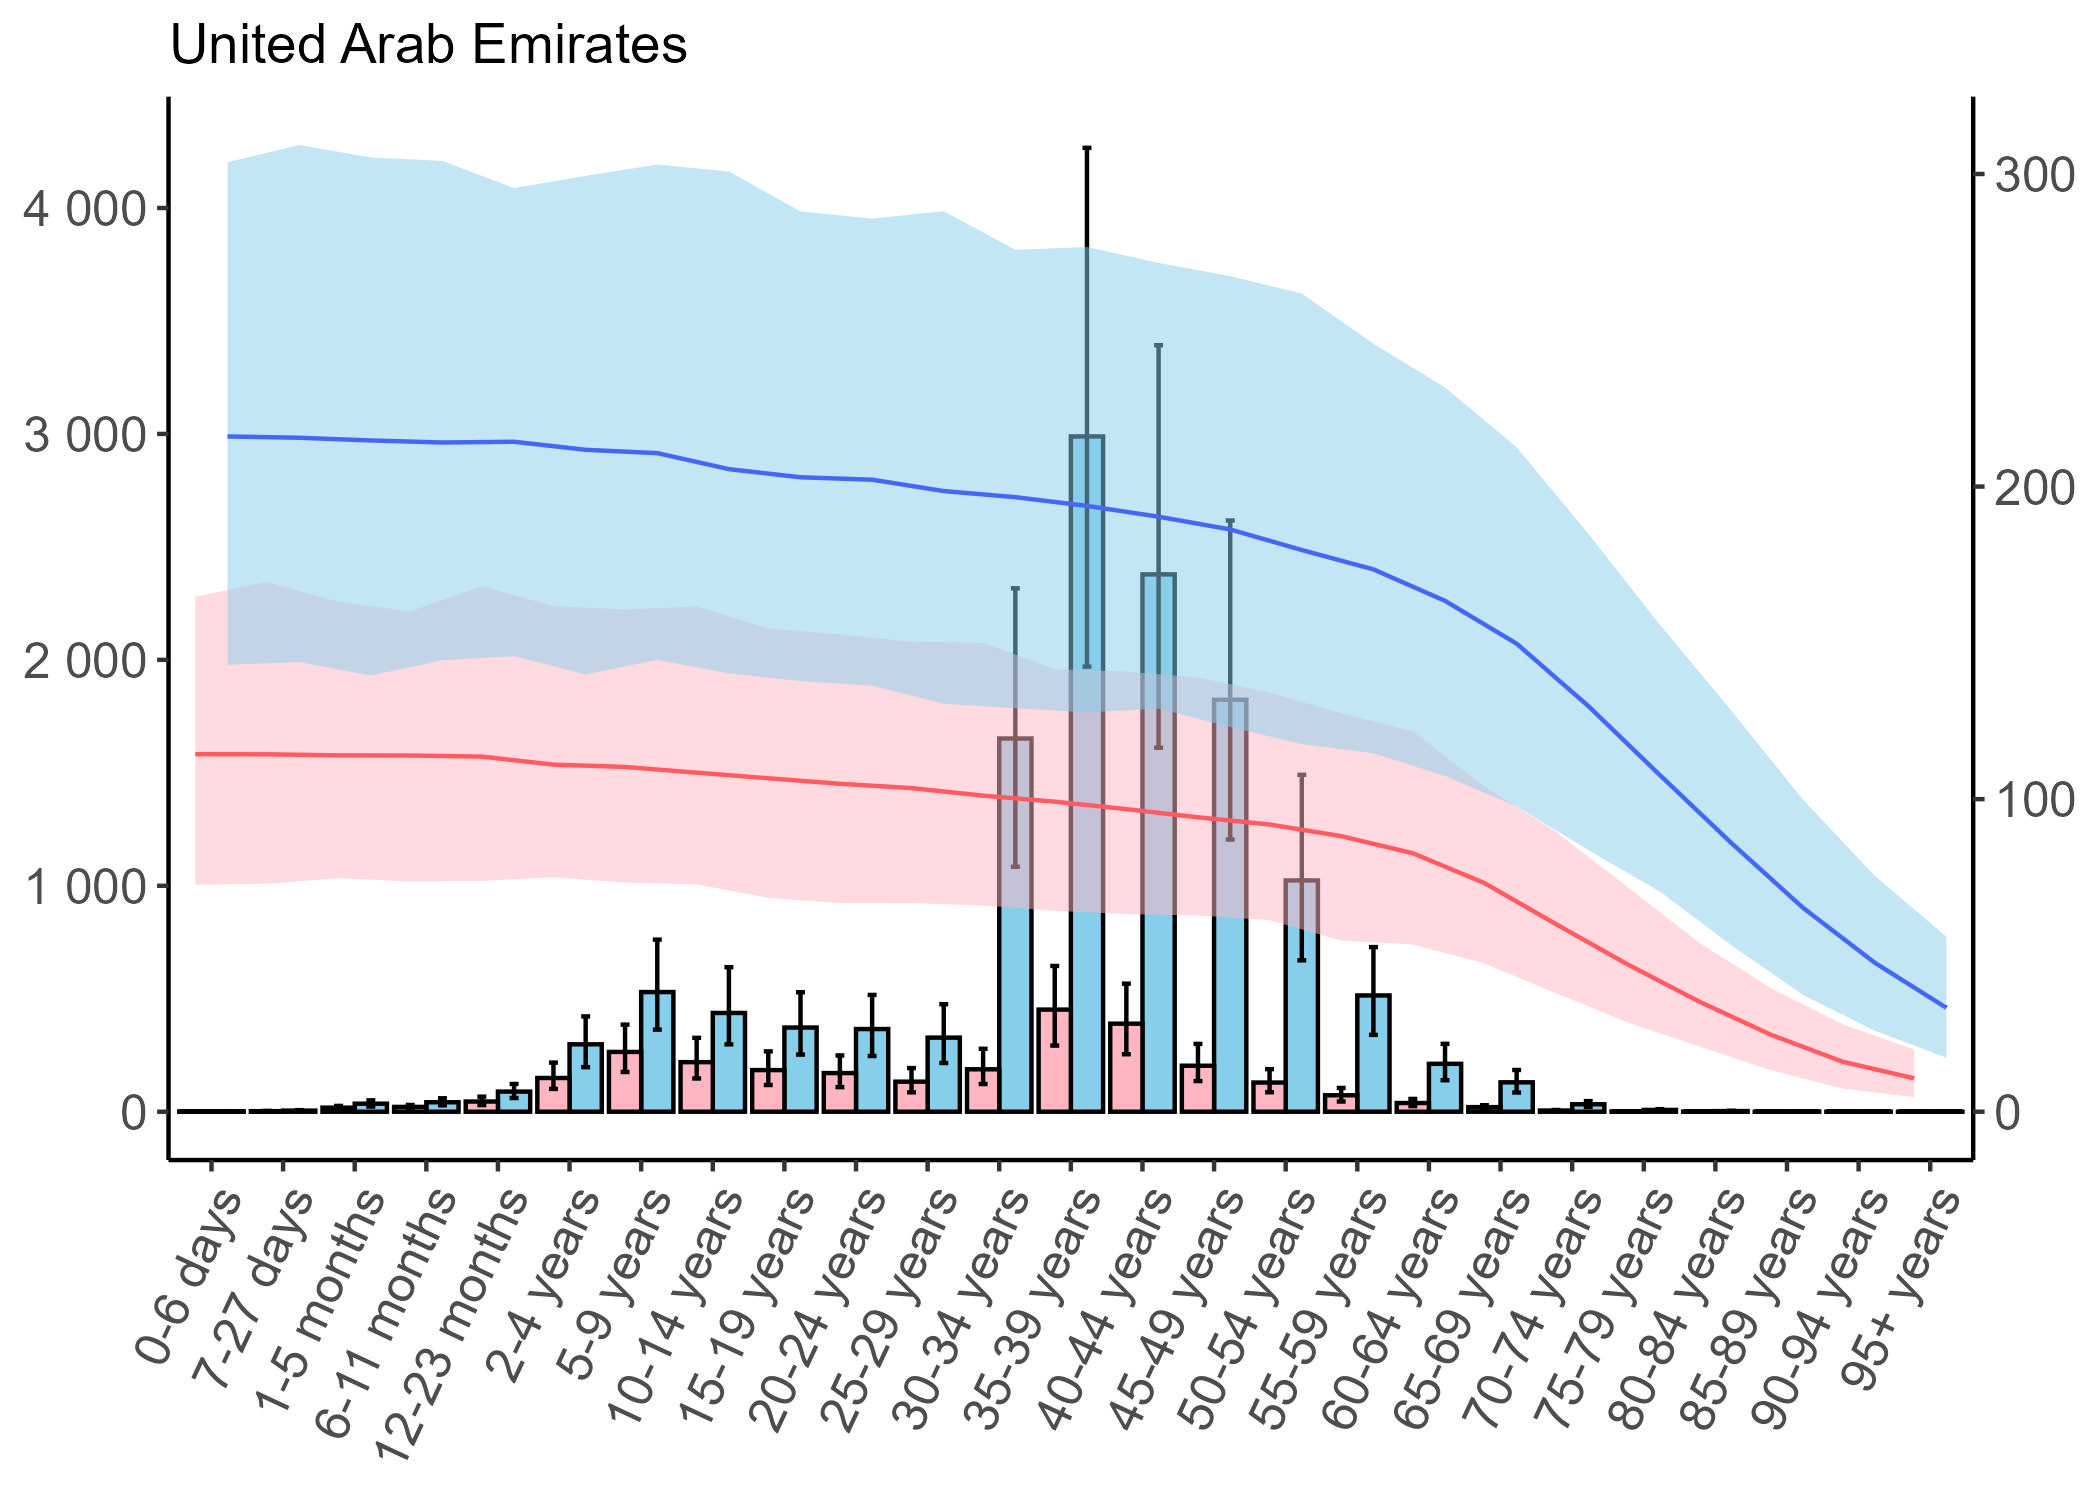

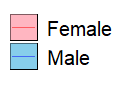

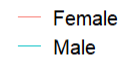

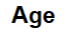

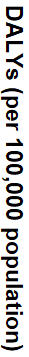

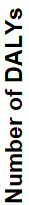


Supplemental Figure_4. The trends of Autism-Spectrum Disorder DALYs across all age groups among males and females. Distribution of DALYs across age groups, highlighting sex differences and age-related patterns in ASD burden.

DALYs: Disability Adjusted Life Years, ASDALYR: Age-standardized DALYs rate, BRICS: Brazil, Russian Federation, India, China, South Africa, Egypt, Ethiopia, Saudi Arabia, Iran, United Arab Emirates; Error bars indicate the 95% uncertainty level (UI) for the number of cases; Shading indicates the 95% UI for the age-standardized prevalence rate.
