# Supplementary material for: Trends and Burden of Autism Spectrum Disorder in BRICS Countries: A Global Burden of Disease Analysis from 1990 to 2021
Source: Research Square preprint supplement (doi:10.21203/rs.3.rs-7626996/v1), 2025-10-09
Supplement: Supplementary file 2 [file f955f2e0f81e6a5d0a8f51a9.docx]

Supplemental Table_1. Age standardized incidence of ASD and AAPC from 1990 to 2021.

| Location | 1990 | |  | 2021 | |  | AAPC_95%CI |
| --- | --- | --- | --- | --- | --- | --- | --- |
| Number _95%UI | ASIR |  | Number _95%UI | ASIR |  |  |
| Global | 1146018.28(962459.77, 1357586.30) | 18.56(15.59, 21.99) |  | 1163706.03(981645.38, 1371347.25) | 17.75(14.98, 20.92) |  | 0.16  (0.16,0.17) |
| BRICS | 467354.20(392035.41, 551847.12) | 00.00(00.00, 00.00) |  | 380300.95(318863.73, 449183.40) | 00.00(00.00, 00.00) |  | 0.00  (0.00,0.00) |
| China | 159475.00(133374.75, 188027.49) | 14.32(11.98,  16.89) |  | 77486.18(64597.41, 91916.60) | 10.02(8.35, 11.88) |  | 0.05  (0.01,0.09) |
| Brazil | 22451.25(18722.33, 26553.35) | 13.70(11.42, 16.20) |  | 23242.49(19456.70, 27530.51) | 14.20(11.80, 16.70) |  | 0.03  (0.02,0.03) |
| India | 194180.95(163238.05, 229933.59) | 16.77(14.10, 19.86) |  | 182558.59(153501.88, 215015.53) | 16.47(13.84, 19.39) |  | 0.26  (0.25,0.27) |
| Russian | 20016.72(16879.69, 23541.40) | 17.29(14.58, 20.34) |  | 13961.93(11726.02, 16532.42) | 18.42(15.47, 21.81) |  | 0.06  (0.05, 0.06) |
| South Africa | 11049.77(9281.47, 13011.70) | 22.75(19.11, 26.78) |  | 10402.65(8756.88, 12266.95) | 21.06(17.72, 24.83) |  | 0.01  (0.01,0.02) |
| Egypt | 16317.74(13604.30, 19224.54) | 19.20(16.01, 22.62) |  | 22188.55(18534.43, 26178.77) | 17.09(14.28, 20.16) |  | -0.03  (-0.05,-0.02) |
| Saudi Arabia | 4437.95(3706.38,5232.74) | 18.43(15.39, 21.73) |  | 3995.49(3318.26,4730.02) | 16.49(13.69, 19.52) |  | -0.02  (-0.03,-0.02) |
| Iran | 13359.87(11236.53, 15775.51) | 15.29(12.86, 18.06) |  | 8971.19(7509.79, 10556.91) | 14.64(12.25, 17.22) |  | 0.04  (0.03,0.05) |
| United Arab Emirates | 417.33(347.02,501.12) | 18.38(15.29, 22.08) |  | 630.79(528.99, 752.35) | 14.64(12.28, 17.46) |  | -0.14  (-0.15,-0.12) |
| Ethiopia | 25647.61(21644.88, 30045.67) | 26.72(22.55, 31.30) |  | 36863.10(30933.36, 43703.33) | 23.18(9.46, 27.49) |  | 0.02  (0.02,0.03) |

UI: Uncertainty Interval,CI: confidence interval, BRICS: Brazil, Russian Federation, India, China, South Africa, Egypt, Ethiopia, Saudi Arabia, Iran, United Arab Emirates; ASIR: Age-standardized incidence rate, AAPC: Average Annual Percentage Change.

| Location | 1990 | |  | 2021 | |  | AAPC_95%CI |
| --- | --- | --- | --- | --- | --- | --- | --- |
| Number _95%UI | ASDALYR |  | Number _95%UI | ASDALYR |  |  |
| Global | 7868387.00(5351164.32, 11069616.88) | 144.52(98.66, 203.15) |  | 11544038.08(7842314.67, 16288865.17) | 147.55(100.30, 207.38) |  | 0.07  (0.07,0.07) |
| BRICS | 3333619.00(2278284.27, 4702305.08) | 126.68(86.79,  178.37) |  | 4721012.05(3206305.47, 6638789.02) | 132.84(90.52,  187.10) |  | 0.16  (0.15, 0.16) |
| China | 1392966.25(943870.09, 1971071.00) | 115.81(78.91, 163.68) |  | 1700739.37(1146589.61, 2397647.30) | 124.18(84.22, 175.69) |  | 0.23  (0.22,0.23) |
| Brazil | 174992.62(121003.21, 245475.06) | 113.17(78.28, 158.57) |  | 247434.60(166838.64, 346061.87) | 114.35(77.68, 160.37) |  | 0.04  (0.03,0.04) |
| India | 1168135.95(803219.86, 1647738.99) | 130.13(89.69, 182.60) |  | 1887142.73(1285675.27, 2649047.79) | 131.90(90.15, 185.23) |  | 0.04  (0.04,0.05) |
| Russian | 249540.06(170444.74, 349117.98) | 168.63(115.12, 236.88) |  | 237329.78(163784.80, 332073.89) | 173.87(119.91, 243.74) |  | 0.1  (0.1,0.1) |
| South Africa | 64565.45(44800.18, 91296.68) | 166.26(114.97, 233.47) |  | 97377.93(66683.51, 136766.66) | 169.07(115.78, 237.59) |  | 0.06  (0.05,0.06) |
| Egypt | 81337.00(56167.53, 114586.36) | 139.79(94.30, 198.06) |  | 156034.13(105616.61, 220041.34) | 143.04(95.95, 202.04) |  | 0.08  (0.07,0.08) |
| Saudi Arabia | 24723.05(17115.70, 34817.73) | 148.34(100.96, 209.61) |  | 59138.17(40824.62, 84470.43) | 152.75(217.91, 102.82) |  | 0.1  (0.09,0.1) |
| Iran | 86572.36(58946.82, 120628.41) | 143.87(98.23, 201.24) |  | 126162.16(85750.68, 178256.43) | 147.767(100.86, 207.75) |  | 0.09  (0.08,0.09) |
| United Arab Emirates | 3096.94(2112.99,4329.13) | 156.21(105.45, 219.57) |  | 15979.76(10922.27, 22626.15) | 157.16(105.83, 222.85) |  | 0.02  (0.01,0.03) |
| Ethiopia | 87689.31(60603.15, 123243.73) | 159.75(110.45, 224.79) |  | 193673.41(133619.46, 271797.16) | 167.14(115.37, 233.55) |  | 0.15  (0.15,0.15) |

Supplemental Table_2. Age standardized DALYs of ASD and AAPC from 1990 to 2021.

UI: Uncertainty Interval,CI: confidence interval, BRICS: Brazil, Russian Federation, India, China, South Africa, Egypt, Ethiopia, Saudi Arabia, Iran, United Arab Emirates; DALYs: Disability adjusted life years, ASDALYR: Age-standardized DALYs rate, AAPC: Average Annual Percentage Change.
